# Supplementary material for: Assessing future impacts of tropical cyclones on global banana production
Source: Copernicus journal article supplement (doi:10.5194/nhess-2023-182), 2023-12-12

Global distribution of impacted banana producing areas across different damage levels under various return periods for both baseline(1980-2017) and future climates (2015-2050).

*Present climate conditions*

RP10

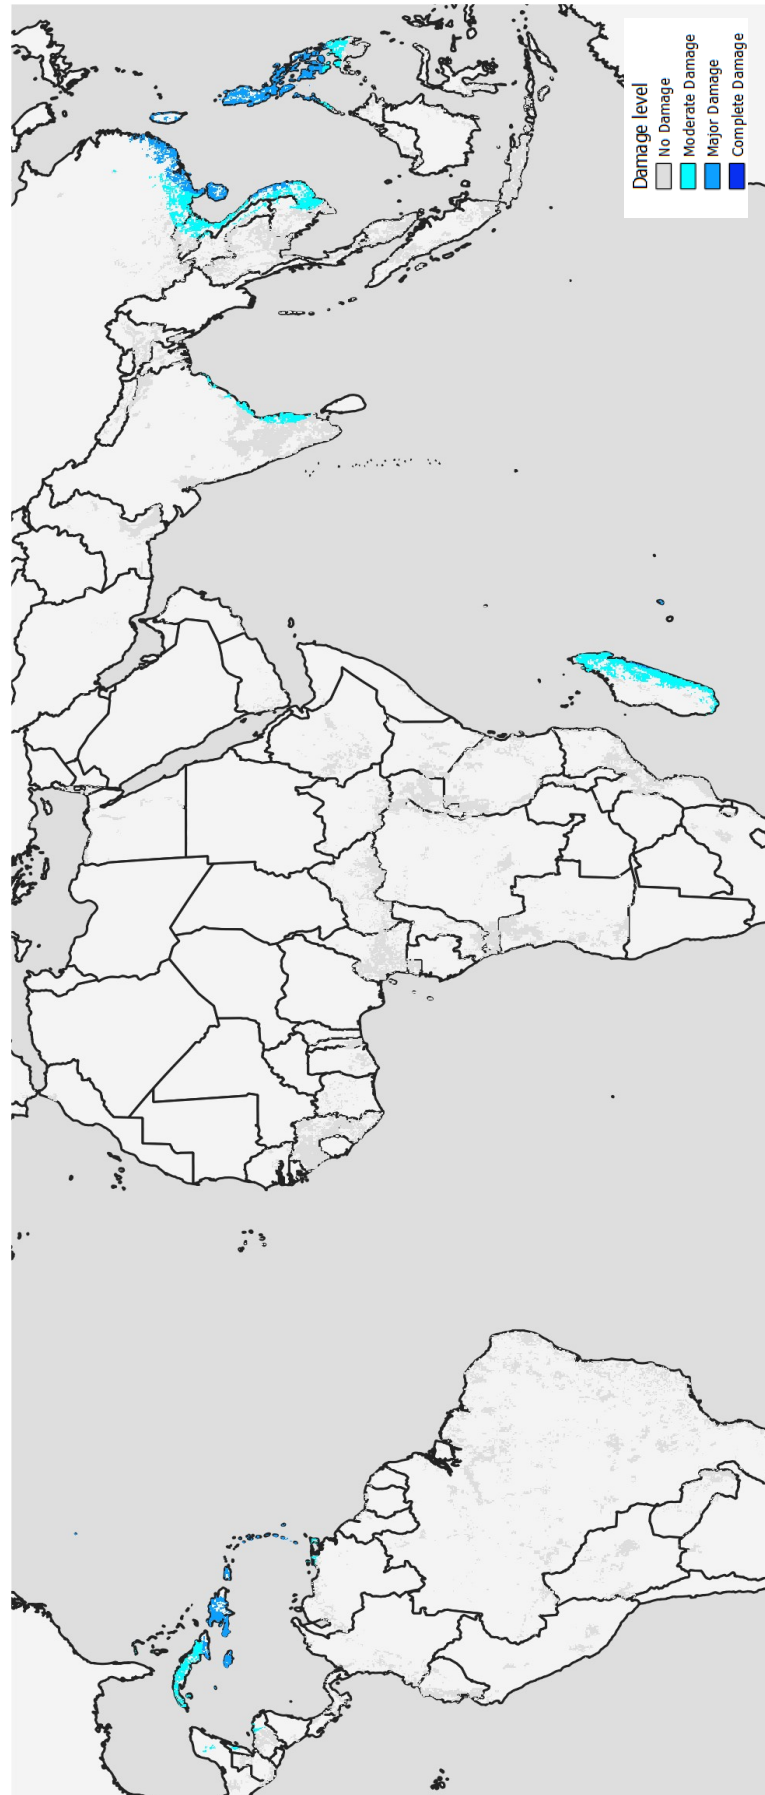

Present climate conditions

RP100

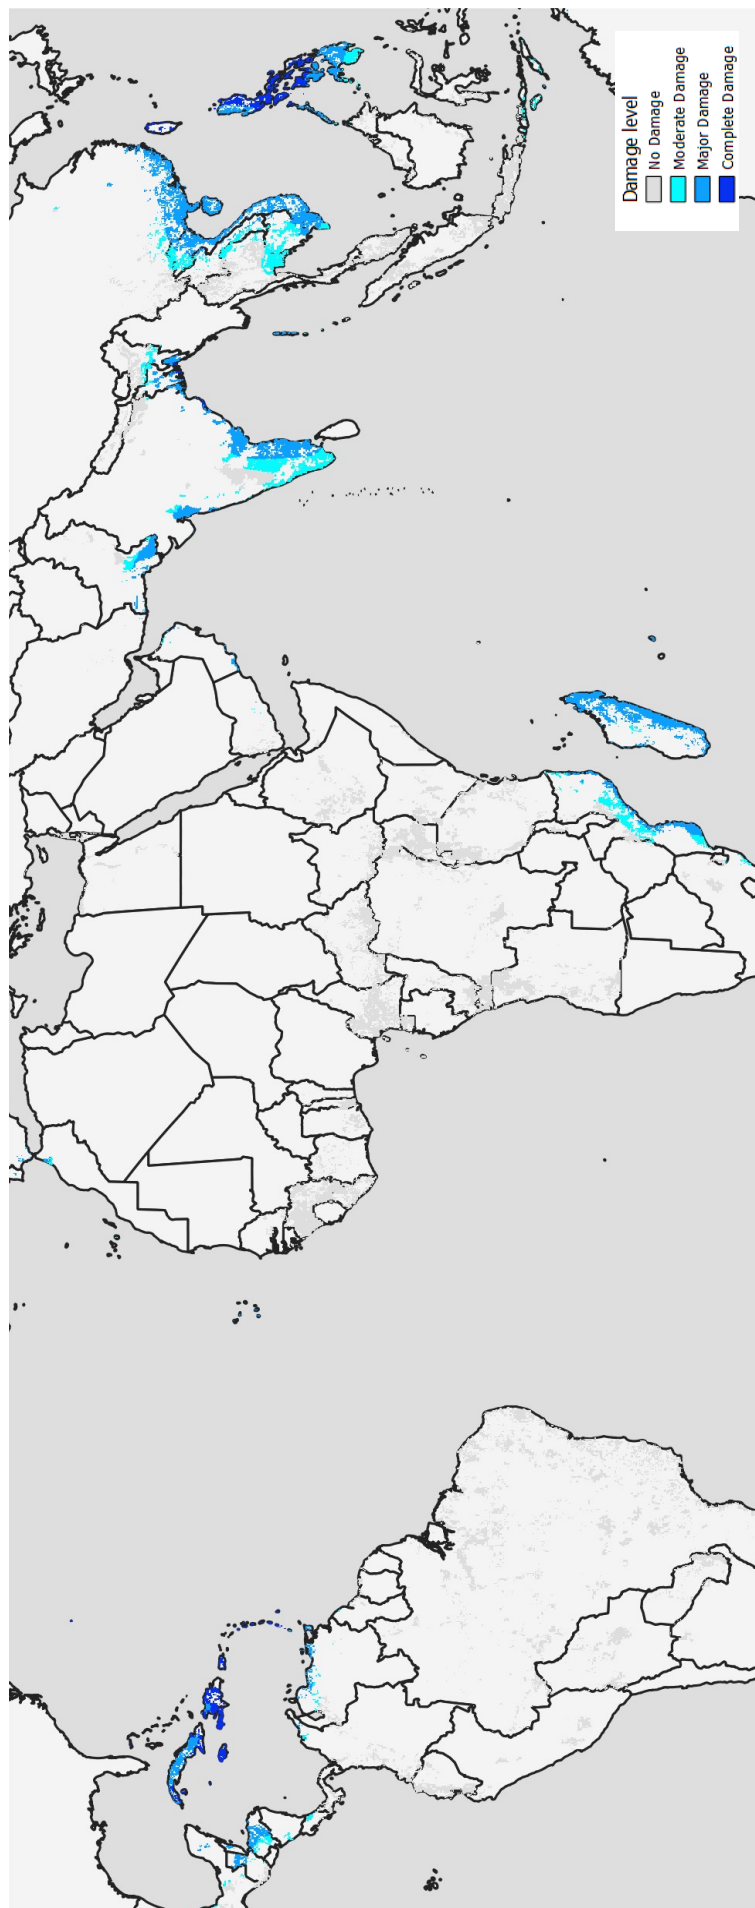

Present climate conditions

RP200

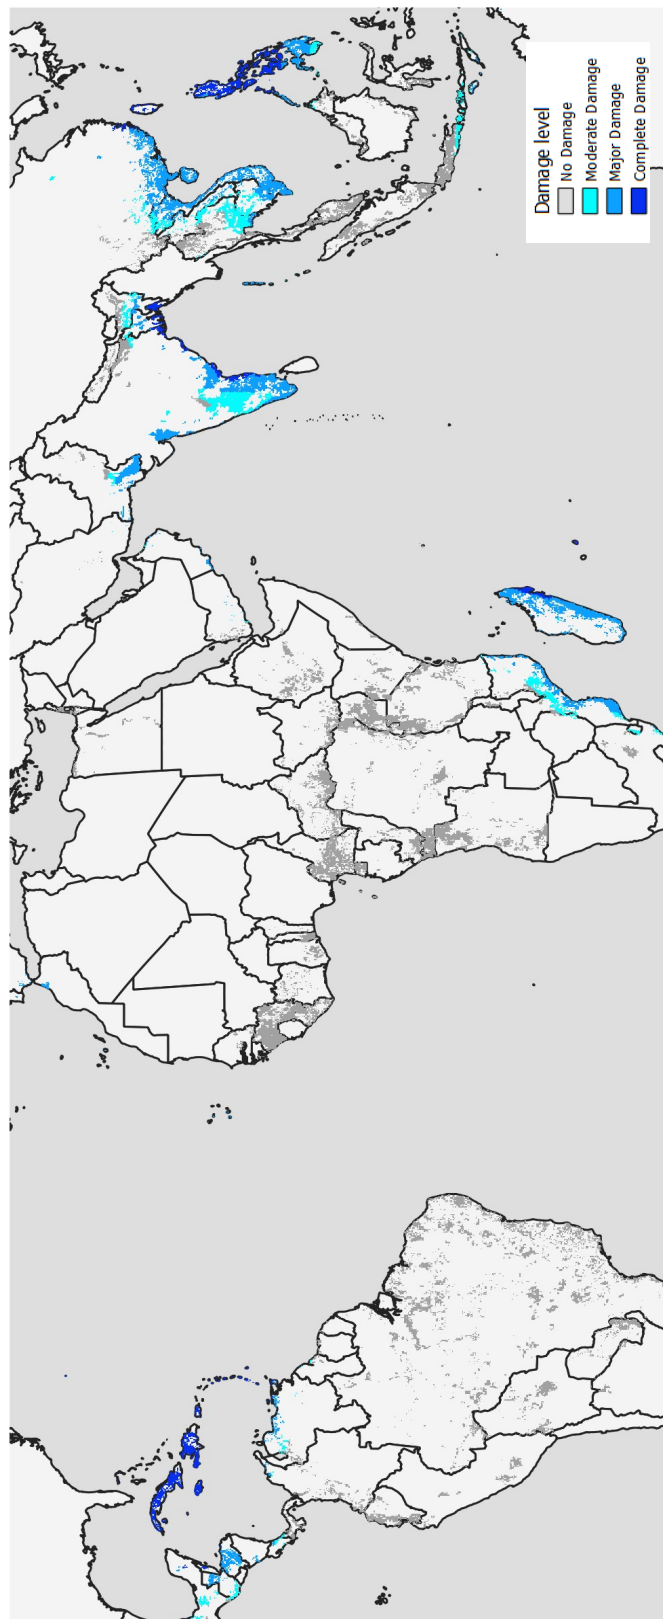

Future climate conditions

RP10

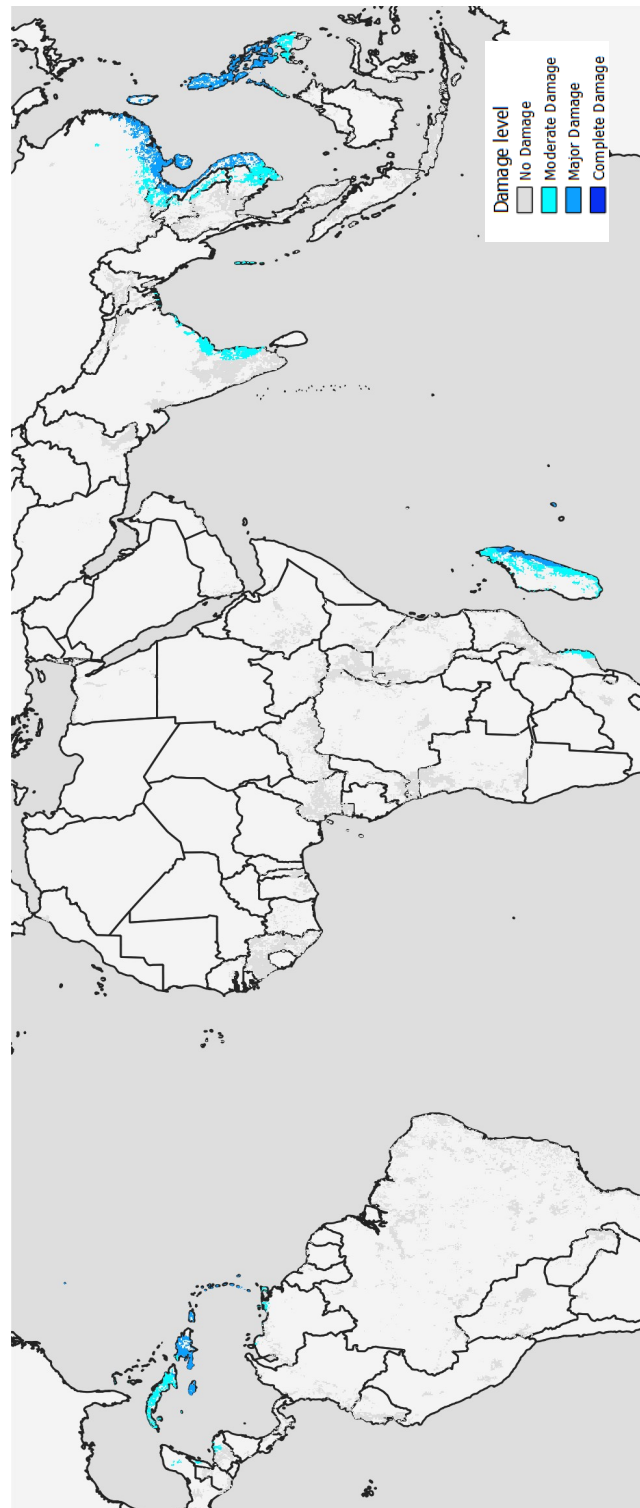

Future climate conditions

RP100

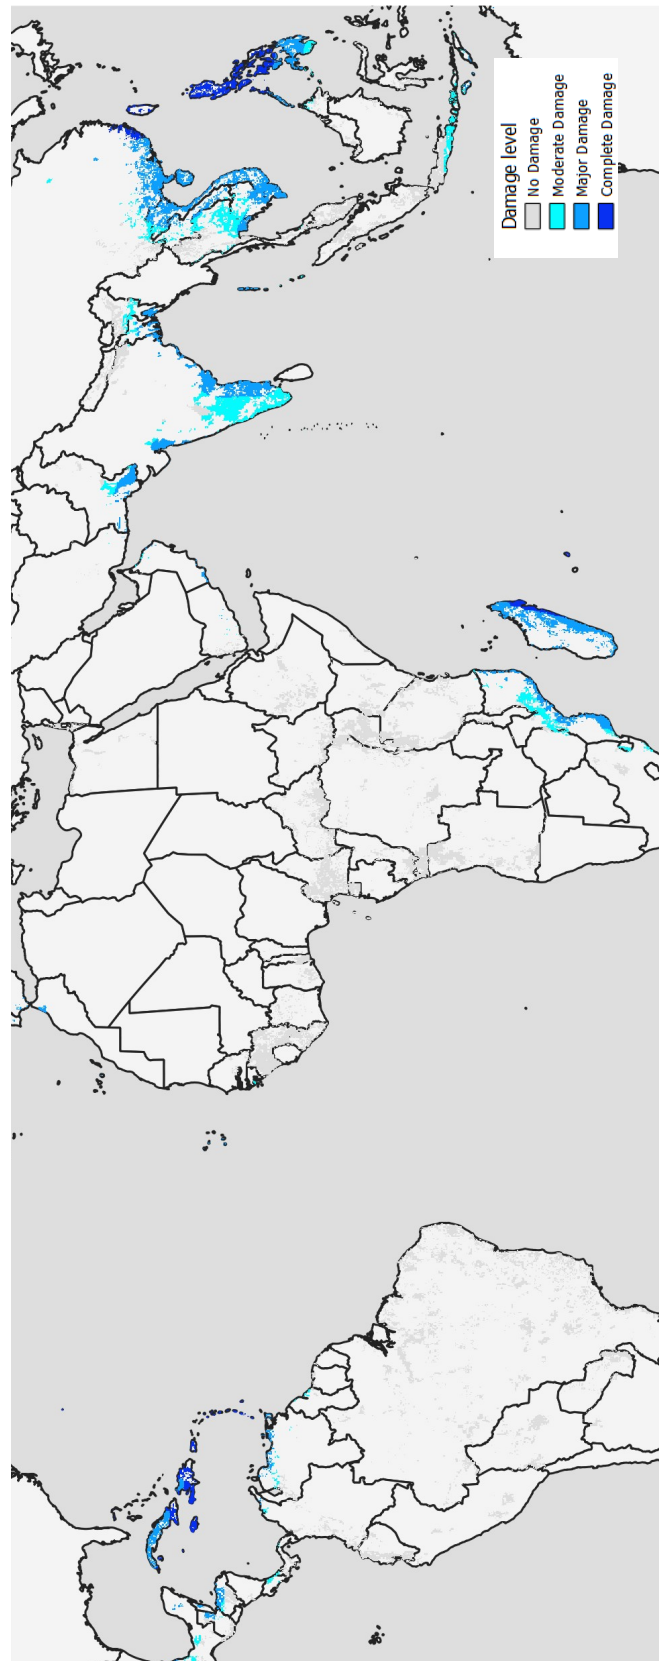

Future climate conditions

RP200

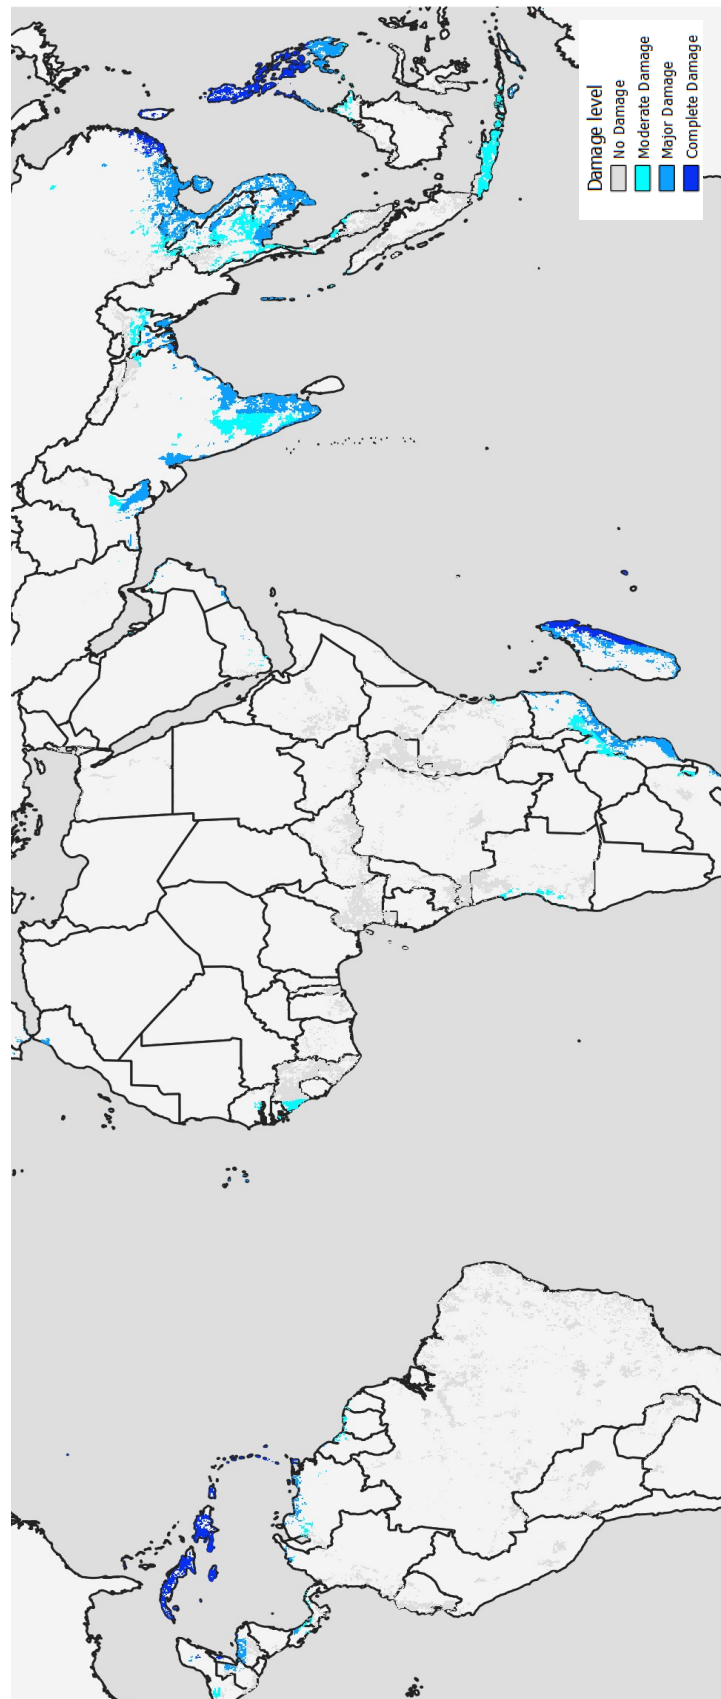

Supplement: Supplementary file 1 [file nhess-2023-182-supplement-version4.zip]
