# Supplementary material for: Assessing future impacts of tropical cyclones on global banana production
Source: Copernicus journal article supplement (doi:10.5194/nhess-2023-182), 2023-12-12
Supplement: Supplementary file 1 [file nhess-2023-182-supplement-version4.zip]

## Sheet: summaries
global summary
total production	8.71048e+07
		present			future
		RP10	RP100	RP200	RP10	RP100	RP200
	class 1	7.3873e+06	1.29501e+07	1.08991e+07	8.88315e+06	1.46001e+07	1.01996e+07
	class 2	6.75221e+06	2.35842e+07	2.86248e+07	8.79371e+06	2.3686e+07	3.03792e+07
	class 3	0	2.65019e+06	4.56139e+06	0	3.44702e+06	4.4015e+06
	shares
		present			future
		RP10	RP100	RP200	RP10	RP100	RP200
	class 1	0.0848093	0.148673	0.125126	0.101982	0.167616	0.117096
	class 2	0.0775182	0.270757	0.328625	0.100956	0.271926	0.348766				RP100							RP100
	class 3	0	0.0304253	0.0523667	0	0.0395733	0.0505311					Class 2		Class3					Class 2		Class3
											region	current	future	current future				region	current	future	current	future
	changes in the future										Caribbean	0.194781	0.292431	0.681412	0.583761			Caribbean	0.194781	0.292431	0.681412	0.583761
											Central Africa	0	0	0	0			Central America	0.123854	0.0887307	1.47934e-07	0.0131909
											Central America	0.123854	0.0887307	1.47934e-07	0.0131909			South America	0.0100691	0.0103121	0	0
		RP10	RP100	RP200							East Africa	0.0322881	0.0286351	9.59771e-08	0.0079516			West Africa	0.00182303	0.00182303	0	0
	Moderate	0.20249	0.127414	-0.0641766							East Asia	0.75461	0.661332	0.0299039	0.132629			East Africa	0.0322881	0.0286351	9.59771e-08	0.0079516
	Major	0.302346	0.00431781	0.0612899														South Africa	3.03806e-06	0.00153665	0	0
	Complete		0.30067	-0.0350535							Middle East and North Africa	0.0999033	0.155222	0	0			Middle East and North Africa	0.0999033	0.155222	0	0
																		East Asia	0.75461	0.661332	0.0299039	0.132629
											Oceania	0.191057	0.205177	9.59237e-07	0.00908177			South Asia	0.419787	0.422977	0.0065945	0
																		Southeast Asia	0.386361	0.433888	0.0792431	0.0884046
											South Africa	3.03806e-06	0.00153665	0	0			Oceania	0.191057	0.205177	9.59237e-07	0.00908177
											South America	0.0100691	0.0103121	0	0
											South Asia	0.419787	0.422977	0.0065945	0
											Southeast Asia	0.386361	0.433888	0.0792431	0.0884046
											West Africa	0.00182303	0.00182303	0	0
												0	0	0	0
											World	0.270757	0.271926	0.0304253	0.0395733

## Sheet: pivotRP10
Row Labels	Sum of total production	Sum of present_class1	Sum of present_class2	Sum of present_class3	Sum of future_class1	Sum of future_class2	Sum of future_class3
Caribbean	1.47167e+06	145345	1.14409e+06	0	207740	1.0817e+06	0
Central Africa	2.12035e+06	0	0	0	0	0	0
Central America	6.75978e+06	131601	46828.3	0	127059	95469.1	0
East Africa	1.04192e+07	216795	28231	0	165583	126669	0
East Asia	7.46648e+06	1.9199e+06	3.9394e+06	0	413063	5.52088e+06	0
Europe	273794	0	0	0	219.6	0	0
Middle East and North Africa	1.35053e+06	0	0	0	0	0	0
north america	6609.5	0	5501.6	0	0	5501.6	0
Oceania	1.0425e+06	106628	9467.7	0	131117	11145.3	0
other	468.768	0	0	0	0	0	0
South Africa	329158	0	0	0	0	0	0
South America	1.45219e+07	30379.3	0	0	79610.1	0	0
South Asia	2.33717e+07	1.48365e+06	0	0	2.88758e+06	0	0
Southeast Asia	1.59569e+07	3.353e+06	1.57869e+06	0	4.87118e+06	1.95235e+06	0
West Africa	1.89788e+06	0	0	0	0	0	0
West Asia	115936	0	0	0	0	0	0
(blank)
Grand Total	8.71048e+07	7.3873e+06	6.75221e+06	0	8.88315e+06	8.79371e+06	0

## Sheet: pivotRP100
									Row Labels	Sum of total production	Sum of present_class1	Sum of present_class2	Sum of present_class3	Sum of future_class1	Sum of future_class2	Sum of future_class3
									Caribbean	1.47167e+06	0	286653	1.00281e+06	0	430362	859102
									Anguilla	0	0	0	0	0	0	0
									Antigua and Barbuda	145.1	0	0	144.2	0	0	144.2
									Aruba	0	0	0	0	0	0	0
									Bahamas	2624.7	0	0	654.7	0	0	654.7
									Barbados	721.5	0	0	547.2	0	0	547.2
									Bermuda	4.88558	0	0	5.11578	0	0	5.11578
									Bonaire	0	0	0	0	0	0	0
									British Virgin Islands	16.5498	0	0	17.3408	0	0	17.3408
									Cayman Islands	173.6	0	0	173.6	0	0	173.6
									Cuba	186473	0	110519	65556.5	0	101192	74884.1
									Curacao	0	0	0	0	0	0	0
									Dominica	15155.3	0	0	12338.3	0	0	12338.3
									Dominican Republic	526289	0	88026.8	423333	0	213018	298341
									Grenada	313.6	0	313.6	0	0	0	313.6
									Guadeloupe	39222.5	0	0	32638.7	0	0	32638.7
									Haiti	270074	0	85798.1	179027	0	114156	150669
									Jamaica	36808.9	0	0	36633.7	0	0	36633.7
									Martinique	208737	0	0	157982	0	0	157982
									Montserrat	138	0	0	138	0	0	138
									Puerto Rico	45995.3	0	0	39681.8	0	0	39681.8
									Saba	0	0	0	0	0	0	0
									Saint Barthelemy	0	0	0	0	0	0	0
									Saint Eustatius	0	0	0	0	0	0	0
									Saint Kitts and Nevis	0	0	0	0	0	0	0
									Saint Lucia	19704.2	0	0	16937.7	0	0	16937.7
									Saint Martin	0	0	0	0	0	0	0
									Saint Vincent and the Grenadines	37001.6	0	0	37001.6	0	0	37001.6
									Sint Maarten	0	0	0	0	0	0	0
									Suriname	78910.4	0	0	0	0	0	0
									Trinidad and Tobago	3156.9	0	1995.5	0	0	1995.5	0
									Turks and Caicos Islands	0	0	0	0	0	0	0
									US Virgin Islands	0	0	0	0	0	0	0
									Central Africa	2.12035e+06	0	0	0	0	0	0
									Angola	1.59868e+06	0	0	0	0	0	0
									Central African Republic	115497	0	0	0	0	0	0
									Congo	73216.1	0	0	0	0	0	0
									Congo DRC	286948	0	0	0	0	0	0
									Equatorial Guinea	32549.5	0	0	0	0	0	0
									Gabon	13455.4	0	0	0	0	0	0
									Central America	6.75978e+06	2.05839e+06	837223	0	2.40333e+06	599800	89167.9
									Belize	72980.1	0	63334.3	0	0	63137.3	197
									Costa Rica	1.857e+06	1.57249e+06	0	0	1.66713e+06	0	0
									El Salvador	0	0	0	0	0	0	0
									Guatemala	1.97851e+06	114150	217647	0	129230	171094	0
									Honduras	637787	161350	388264	0	69621.2	224044	0
									Mexico	1.91677e+06	183005	166931	0	473385	141525	88970.9
									Nicaragua	40000.2	27395.6	1048	0	0	0	0
									Panama	256733	0	0	0	63962.8	0	0
									East Africa	1.04192e+07	114964	336415	0	119791	298353	82849
									Burundi	1.929e+06	0	0	0	0	0	0
									Comoros	0	0	0	0	0	0	0
									Djibouti	0	0	0	0	0	0	0
									Eritrea	0.9	0	0	0	0	0	0
									Ethiopia	233962	0	0	0	0	0	0
									Kenya	1.19802e+06	0	0	0	0	0	0
									Madagascar	267985	1036.3	244740	0	0	169512	76264.4
									Malawi	365517	0	0	0	68.9	0	0
									Mauritius	7272.9	0	6584.6	0	0	0	6584.6
									Mayotte	0	0	0	0	0	0	0
									Mozambique	245445	101261	85091	0	88953.7	128842	0
									Rwanda	2.2932e+06	0	0	0	0	0	0
									Somalia	22114.1	0	0	0	0	0	0
									South Sudan	511344	0	0	0	0	0	0
									Tanzania	2.72944e+06	379.2	0	0	1183.9	0	0
									Uganda	538001	0	0	0	0	0	0
									Zambia	2211.9	0	0	0	0	0	0
									Zimbabwe	75643.5	12287.4	0	0	29584.3	0	0
									East Asia	7.46648e+06	576860	5.63428e+06	223277	857105	4.93782e+06	990271
									China	7.46644e+06	576860	5.63428e+06	223277	857105	4.93782e+06	990271
									Japan	36.2	0	0	0	0	0	0
									Mongolia	0	0	0	0	0	0	0
									North Korea	0	0	0	0	0	0	0
									South Korea	0	0	0	0	0	0	0
									Europe	273794	4157	29593.5	0	497	33253.5	0
									Albania	7.1	0	0	0	0	0	0
									Andorra	9	0	0	0	0	0	0
									Austria	0	0	0	0	0	0	0
									Azores	0	0	0	0	0	0	0
									Belarus	0	0	0	0	0	0	0
									Belgium	0	0	0	0	0	0	0
									Bosnia and Herzegovina	0	0	0	0	0	0	0
									Bouvet Island	0	0	0	0	0	0	0
									Bulgaria	23.7	0	0	0	0	0	0
									Canarias	347.9	307.2	0	0	0	307.2	0
									Croatia	0	0	0	0	0	0	0
									Cyprus	3930	0	0	0	0	0	0
									Czech Republic	0	0	0	0	0	0	0
									Denmark	0	0	0	0	0	0	0
									Estonia	0	0	0	0	0	0	0
									Faroe Islands	0	0	0	0	0	0	0
									Finland	0	0	0	0	0	0	0
									France	9	0	0	0	0	0	0
									Germany	0	0	0	0	0	0	0
									Gibraltar	0.203088	0	0	0	0	0	0
									Greece	2149.5	0	0	0	0	0	0
									Greenland	0	0	0	0	0	0	0
									Guernsey	0	0	0	0	0	0	0
									Hungary	0	0	0	0	0	0	0
									Iceland	0	0	0	0	0	0	0
									Ireland	0	0	0	0	0	0	0
									Isle of Man	0	0	0	0	0	0	0
									Italy	224.1	0	0	0	0	0	0
									Jersey	0	0	0	0	0	0	0
									Latvia	0	0	0	0	0	0	0
									Liechtenstein	0	0	0	0	0	0	0
									Lithuania	0	0	0	0	0	0	0
									Luxembourg	0	0	0	0	0	0	0
									Madeira	0	0	0	0	0	0	0
									Malta	0	0	0	0	0	0	0
									Moldova	0	0	0	0	0	0	0
									Monaco	0	0	0	0	0	0	0
									Montenegro	0	0	0	0	0	0	0
									Netherlands	0	0	0	0	0	0	0
									North Macedonia	2.4	0	0	0	0	0	0
									Norway	0	0	0	0	0	0	0
									Poland	0	0	0	0	0	0	0
									Portugal	18164.9	0	705.9	0	0	705.9	0
									Romania	0	0	0	0	0	0	0
									Russian Federation	0	0	0	0	0	0	0
									San Marino	0	0	0	0	0	0	0
									Serbia	0	0	0	0	0	0	0
									Slovakia	0	0	0	0	0	0	0
									Slovenia	0	0	0	0	0	0	0
									Spain	248926	3849.8	28887.6	0	497	32240.4	0
									Svalbard	0	0	0	0	0	0	0
									Sweden	0	0	0	0	0	0	0
									Switzerland	0	0	0	0	0	0	0
									Ukraine	0	0	0	0	0	0	0
									United Kingdom	0	0	0	0	0	0	0
									Vatican City	0	0	0	0	0	0	0
									Middle East and North Africa	1.35053e+06	76551.4	134922	0	6794.3	209632	0
									Algeria	200.2	0	0	0	0	0	0
									Bahrain	0	0	0	0	0	0	0
									Egypt	816260	0	0	0	0	0	0
									Iran	73820.8	0	188.6	0	370.1	188.6	0
									Iraq	381.1	0	0	0	0	0	0
									Israel	62937.6	0	0	0	0	0	0
									Jordan	36662.6	0	0	0	0	0	0
									Kuwait	0	0	0	0	0	0	0
									Lebanon	50679.7	0	0	0	0	0	0
									Libya	0	0	0	0	0	0	0
									Morocco	187680	72873.7	114806	0	0	187680	0
									Oman	28080	1597.7	19765.8	0	3347.6	19765.8	0
									Palestinian Territory	940	0	0	0	0	0	0
									Qatar	0	0	0	0	0	0	0
									Saudi Arabia	0	0	0	0	0	0	0
									Sudan	1870.5	0	0	0	0	0	0
									Syria	167.9	0	0	0	0	0	0
									Tunisia	0	0	0	0	0	0	0
									United Arab Emirates	178.9	0	0	0	0	0	0
									Yemen	90666	2080	161.3	0	3076.6	1997.4	0
									north america	6609.5	0	0	5501.6	0	0	5501.6
									Canada	0	0	0	0	0	0	0
									Saint Pierre and Miquelon	0	0	0	0	0	0	0
									United States	6609.5	0	0	5501.6	0	0	5501.6
									Oceania	1.0425e+06	50631.3	199176	0	86955.8	213896	9467.7
									American Samoa	0	0	0	0	0	0	0
									Australia	196539	430.9	137520	0	830.8	137855	0
									Christmas Island	0	0	0	0	0	0	0
									Cocos Islands	0	0	0	0	0	0	0
									Cook Islands	0	0	0	0	0	0	0
									Fiji	3013.6	0	0	0	0	0	0
									French Polynesia	34.1	0	0	0	0	0	0
									Guam	287.1	0	0	0	0	0	0
									Kiribati	0	0	0	0	0	0	0
									Marshall Islands	0	0	0	0	0	0	0
									Micronesia	357.9	298.5	0	0	119.8	178.7	0
									Nauru	0	0	0	0	0	0	0
									New Caledonia	688.2	0	619	0	0	0	619
									New Zealand	0	0	0	0	0	0	0
									Niue	80	0	0	0	0	0	0
									Northern Mariana Islands	0	0	0	0	0	0	0
									Palau	0	0	0	0	0	0	0
									Papua New Guinea	830337	49901.9	52188.6	0	86005.2	75862.4	0
									Samoa	0	0	0	0	0	0	0
									Solomon Islands	197.7	0	0	0	0	0	0
									Tokelau	0	0	0	0	0	0	0
									Tonga	34.1249	0	0	0	0	0	0
									Tuvalu	0	0	0	0	0	0	0
									Vanuatu	10925.8	0	8848.7	0	0	0	8848.7
									other	468.768	0	0	0	0	0	0
									French Southern Territories	0	0	0	0	0	0	0
									Glorioso Islands	0	0	0	0	0	0	0
									Heard Island and McDonald Islands	0	0	0	0	0	0	0
									Juan De Nova Island	0	0	0	0	0	0	0
									Norfolk Island	0	0	0	0	0	0	0
									Pitcairn	0	0	0	0	0	0	0
									RÃ©union	0	0	0	0	0	0	0
									Saint Helena	0	0	0	0	0	0	0
									South Georgia and South Sandwich Islands	0	0	0	0	0	0	0
									United States Minor Outlying Islands	0	0	0	0	0	0	0
									Wallis and Futuna	468.768	0	0	0	0	0	0
									South Africa	329158	10280.5	0	0	31462.7	505.8	0
									Botswana	81.5	0	0	0	0	0	0
									Eswatini	4787.6	183.9	0	0	4050.4	0	0
									Lesotho	80.4	0	0	0	0	0	0
									Namibia	27302.8	0	0	0	0	0	0
									South Africa	296905	10096.6	0	0	27412.3	505.8	0
									South America	1.45219e+07	340211	146222	0	362234	149752	0
									Argentina	140500	0	0	0	0	0	0
									Bolivia	127210	0	0	0	0	0	0
									Brazil	5.60069e+06	0	0	0	0	0	0
									Chile	0	0	0	0	0	0	0
									Colombia	1.66682e+06	324230	23332.1	0	324230	23332.1	0
									Ecuador	6.49479e+06	0	0	0	0	0	0
									Falkland Islands	0	0	0	0	0	0	0
									French Guiana	6515.6	0	0	0	0	0	0
									Guyana	4906.5	196.1	0	0	1100.6	0	0
									Paraguay	57529.1	0	0	0	0	0	0
									Peru	66380.2	0	0	0	0	0	0
									Uruguay	0	0	0	0	0	0	0
									Venezuela	356557	15785	122890	0	36903.9	126419	0
									South Asia	2.33717e+07	7.86443e+06	9.81114e+06	154125	8.55165e+06	9.88572e+06	0
									Afghanistan	4.6	0	0	0	0	0	0
									Bangladesh	732221	24264.9	538709	6468.3	141567	427875	0
									Bhutan	562	0	0	0	0	0	0
									British Indian Ocean Territory	0	0	0	0	0	0	0
									India	2.24733e+07	7.81396e+06	9.2279e+06	147657	8.38052e+06	9.40743e+06	0
									Maldives	40.3328	0	0	0	0	0	0
									Nepal	65043.4	0	0	0	0	0	0
									Pakistan	100170	26202.2	44536	0	29564.9	50413.7	0
									Seychelles	401	0	0	0	0	0	0
									Sri Lanka	0	0	0	0	0	0	0
									Southeast Asia	1.59569e+07	1.85365e+06	6.16513e+06	1.26447e+06	2.18005e+06	6.9235e+06	1.41066e+06
									Brunei Darussalam	726.1	0	0	0	0	0	0
									Cambodia	154204	73336.3	68130.5	0	36756.5	106470	0
									Indonesia	4.97488e+06	131537	11857.5	0	1.07871e+06	65293.4	0
									Laos	158149	42866.1	18110.1	0	44117.7	52927.7	0
									Malaysia	268665	227.8	0	0	5183	0	0
									Myanmar	11612.7	676	0	0	2038.4	0	0
									Philippines	7.83521e+06	936274	5.03724e+06	1.26447e+06	501789	5.32566e+06	1.41066e+06
									Singapore	0	0	0	0	0	0	0
									Thailand	1.24567e+06	490036	0	0	461813	215122	0
									Timor-Leste	553	163	0	0	163	0	0
									Vietnam	1.30723e+06	178532	1.02979e+06	0	49481.1	1.15802e+06	0
									West Africa	1.89788e+06	0	3459.9	0	275.6	3459.9	0
									Benin	13677.9	0	0	0	0	0	0
									Burkina Faso	0	0	0	0	0	0	0
									CÃ´te d'Ivoire	232461	0	0	0	0	0	0
									Cabo Verde	4994.9	0	3459.9	0	0	3459.9	0
									Cameroon	1.15725e+06	0	0	0	0	0	0
									Chad	105.4	0	0	0	0	0	0
									Gambia	228.5	0	0	0	0	0	0
									Ghana	60946	0	0	0	0	0	0
									Guinea	198890	0	0	0	0	0	0
									Guinea-Bissau	4726.1	0	0	0	275.6	0	0
									Liberia	106328	0	0	0	0	0	0
									Mali	45560.7	0	0	0	0	0	0
									Mauritania	0	0	0	0	0	0	0
									Niger	86.3	0	0	0	0	0	0
									Nigeria	1610.6	0	0	0	0	0	0
									Sao Tome and Principe	21101.9	0	0	0	0	0	0
									Senegal	29992.3	0	0	0	0	0	0
									Sierra Leone	1422.5	0	0	0	0	0	0
									Togo	18506.4	0	0	0	0	0	0
									West Asia	115936	0	0	0	0	0	0
									Armenia	0	0	0	0	0	0	0
									Azerbaijan	0	0	0	0	0	0	0
									Georgia	0	0	0	0	0	0	0
									Kazakhstan	0	0	0	0	0	0	0
									Kyrgyzstan	0	0	0	0	0	0	0
									Tajikistan	0	0	0	0	0	0	0
									Turkiye	115865	0	0	0	0	0	0
									Turkmenistan	70.1	0	0	0	0	0	0
									Uzbekistan	0	0	0	0	0	0	0
									(blank)
									(blank)
									Grand Total	8.71048e+07	1.29501e+07	2.35842e+07	2.65019e+06	1.46001e+07	2.3686e+07	3.44702e+06

## Sheet: pivotRP200
Row Labels	Sum of total production	Sum of present_class1	Sum of present_class2	Sum of present_class3	Sum of future_class1	Sum of future_class2	Sum of future_class3
Caribbean	1.47167e+06	0	578	1.28889e+06	70910.8	262.4	1.2892e+06
Central Africa	2.12035e+06	0	0	0	357088	0	0
Central America	6.75978e+06	3.78959e+06	1.45568e+06	149610	742315	2.26083e+06	163974
East Africa	1.04192e+07	108077	332789	52010	122157	259053	155885
East Asia	7.46648e+06	861706	5.63454e+06	244990	764600	4.85147e+06	1.22812e+06
Europe	273794	497	33253.5	0	0	33750.5	0
Middle East and North Africa	1.35053e+06	7280.9	210458	0	10273.8	210556	58.3
north america	6609.5	0	0	5501.6	0	0	5501.6
Oceania	1.0425e+06	65556.9	226111	7872.9	106553	237462	12446.4
other	468.768	0	0	0	0	0	0
South Africa	329158	16027.7	2860.4	0	44583.2	10030	0
South America	1.45219e+07	330236	241232	2609.5	316729	261712	103.5
South Asia	2.33717e+07	3.89788e+06	1.37865e+07	1.37151e+06	4.35992e+06	1.46785e+07	64948.7
Southeast Asia	1.59569e+07	1.82221e+06	6.69734e+06	1.4384e+06	3.27153e+06	7.57212e+06	1.48126e+06
West Africa	1.89788e+06	0	3459.9	0	32935.3	3459.9	0
West Asia	115936	0	0	0	0	0	0
(blank)
Grand Total	8.71048e+07	1.08991e+07	2.86248e+07	4.56139e+06	1.01996e+07	3.03792e+07	4.4015e+06

## Sheet: RP200 regions
		sums							shares						changes
	Row Labels	total production	present_class1	present_class2	present_class3	future_class1	future_class2	future_class3	present_class1	present_class2	present_class3	future_class1	future_class2	future_class3	class 1	class 2	class 3
	Caribbean	1.47167e+06	0	578	1.28889e+06	70910.8	262.4	1.2892e+06	0	0.000392752	0.8758	0.048184	0.000178301	0.876015	#DIV/0!	-0.546021	0.000244863
	Central Africa	2.12035e+06	0	0	0	357088	0	0	0	0	0	0.16841	0	0	#DIV/0!	#DIV/0!	#DIV/0!
	Central America	6.75978e+06	3.78959e+06	1.45568e+06	149610	742315	2.26083e+06	163974	0.560609	0.215344	0.0221324	0.109813	0.334454	0.0242573	-0.804118	0.553113	0.0960054
	East Africa	1.04192e+07	108077	332789	52010	122157	259053	155885	0.0103729	0.0319401	0.00499177	0.0117242	0.0248631	0.0149614	0.130277	-0.22157	1.99722
	East Asia	7.46648e+06	861706	5.63454e+06	244990	764600	4.85147e+06	1.22812e+06	0.11541	0.754645	0.032812	0.102404	0.649766	0.164485	-0.112691	-0.138977	4.01294
	Europe	273794	497	33253.5	0	0	33750.5	0	0.00181524	0.121455	0	0	0.12327	0	-1	0.0149458	#DIV/0!
	Middle East and North Africa	1.35053e+06	7280.9	210458	0	10273.8	210556	58.3	0.00539116	0.155834	0	0.00760729	0.155907	4.31684e-05	0.411067	0.000466601	#DIV/0!
	north america	6609.5	0	0	5501.6	0	0	5501.6	0	0	0.832378	0	0	0.832378	#DIV/0!	#DIV/0!	0
	Oceania	1.0425e+06	65556.9	226111	7872.9	106553	237462	12446.4	0.0628846	0.216894	0.00755198	0.102209	0.227783	0.011939	0.625344	0.0502046	0.580917
	other	468.768	0	0	0	0	0	0	0	0	0	0	0	0	#DIV/0!	#DIV/0!	#DIV/0!
	South Africa	329158	16027.7	2860.4	0	44583.2	10030	0	0.0486931	0.00869006	0	0.135446	0.0304717	0	1.78163	2.5065	#DIV/0!
	South America	1.45219e+07	330236	241232	2609.5	316729	261712	103.5	0.0227406	0.0166116	0.000179694	0.0218104	0.0180219	7.12716e-06	-0.0409037	0.0848958	-0.960337
	South Asia	2.33717e+07	3.89788e+06	1.37865e+07	1.37151e+06	4.35992e+06	1.46785e+07	64948.7	0.166777	0.589879	0.0586825	0.186547	0.628045	0.00277894	0.118538	0.0647017	-0.952644
	Southeast Asia	1.59569e+07	1.82221e+06	6.69734e+06	1.4384e+06	3.27153e+06	7.57212e+06	1.48126e+06	0.114196	0.419715	0.0901429	0.205023	0.474536	0.0928289	0.795367	0.130616	0.0297966
	West Africa	1.89788e+06	0	3459.9	0	32935.3	3459.9	0	0	0.00182303	0	0.0173537	0.00182303	0	#DIV/0!	0	#DIV/0!
	West Asia	115936	0	0	0	0	0	0	0	0	0	0	0	0	#DIV/0!	#DIV/0!	#DIV/0!
	Grand Total	8.71048e+07	1.08991e+07	2.86248e+07	4.56139e+06	1.01996e+07	3.03792e+07	4.4015e+06	0.125126	0.328625	0.0523667	0.117096	0.348766	0.0505311	-0.0641766	0.0612899	-0.0350535

## Sheet: RP100 regions
		sums							shares						changes
	Row Labels	total production	present_class1	present_class2	present_class3	future_class1	future_class2	future_class3	present_class1	present_class2	present_class3	future_class1	future_class2	future_class3	class 1	class 2	class 3
	Caribbean	1.47167e+06	0	286653	1.00281e+06	0	430362	859102	0	0.194781	0.681412	0	0.292431	0.583761	#DIV/0!	0.501332	-0.143306
	Central Africa	2.12035e+06	0	0	0	0	0	0	0	0	0	0	0	0	#DIV/0!	#DIV/0!	#DIV/0!
	Central America	6.75978e+06	2.05839e+06	837223	1	2.40333e+06	599800	89167.9	0.304506	0.123854	1.47934e-07	0.355533	0.0887307	0.0131909	0.167575	-0.283584	89166.9
	East Africa	1.04192e+07	114964	336415	1	119791	298353	82849	0.0110339	0.0322881	9.59771e-08	0.0114972	0.0286351	0.0079516	0.0419835	-0.11314	82848
	East Asia	7.46648e+06	576860	5.63428e+06	223277	857105	4.93782e+06	990271	0.07726	0.75461	0.0299039	0.114794	0.661332	0.132629	0.48581	-0.123611	3.43517
	Europe	273794	4157	29593.5	0	497	33253.5	0	0.015183	0.108087	0	0.00181524	0.121455	0	-0.880443	0.123676	#DIV/0!
	Middle East and North Africa	1.35053e+06	76551.4	134922	0	6794.3	209632	0	0.0566827	0.0999033	0	0.00503086	0.155222	0	-0.911245	0.553726	#DIV/0!
	north america	6609.5	0	0	5501.6	0	0	5501.6	0	0	0.832378	0	0	0.832378	#DIV/0!	#DIV/0!	0
	Oceania	1.0425e+06	50631.3	199176	1	86955.8	213896	9467.7	0.0485674	0.191057	9.59237e-07	0.0834112	0.205177	0.00908177	0.717432	0.0739028	9466.7
	other	468.768	0	0	0	0	0	0	0	0	0	0	0	0	#DIV/0!	#DIV/0!	#DIV/0!
	South Africa	329158	10280.5	1	0	31462.7	505.8	0	0.0312327	3.03806e-06	0	0.0955855	0.00153665	0	2.06043	504.8	#DIV/0!
	South America	1.45219e+07	340211	146222	0	362234	149752	0	0.0234274	0.0100691	0	0.024944	0.0103121	0	0.0647346	0.0241379	#DIV/0!
	South Asia	2.33717e+07	7.86443e+06	9.81114e+06	154125	8.55165e+06	9.88572e+06	0	0.336493	0.419787	0.0065945	0.365897	0.422977	0	0.0873834	0.00760109	-1
	Southeast Asia	1.59569e+07	1.85365e+06	6.16513e+06	1.26447e+06	2.18005e+06	6.9235e+06	1.41066e+06	0.116166	0.386361	0.0792431	0.136622	0.433888	0.0884046	0.176088	0.123009	0.115611
	West Africa	1.89788e+06	0	3459.9	0	275.6	3459.9	0	0	0.00182303	0	0.000145214	0.00182303	0	#DIV/0!	0	#DIV/0!
	West Asia	115936	0	0	0	0	0	0	0	0	0	0	0	0	#DIV/0!	#DIV/0!	#DIV/0!
	Grand Total	8.71048e+07	1.29501e+07	2.35842e+07	2.65019e+06	1.46001e+07	2.3686e+07	3.44702e+06	0.148673	0.270757	0.0304253	0.167616	0.271926	0.0395733	0.127414	0.00431781	0.30067

## Sheet: RP10 regions
		sums							shares						changes
	Row Labels	total production	present_class1	present_class2	present_class3	future_class1	future_class2	future_class3	present_class1	present_class2	present_class3	future_class1	future_class2	future_class3	class 1	class 2	class 3
	Caribbean	1.47167e+06	145345	1.14409e+06	0	207740	1.0817e+06	0	0.098762	0.777412	0	0.14116	0.735015	0	0.429291	-0.0545369	#DIV/0!
	Central Africa	2.12035e+06	0	0	0	0	0	0	0	0	0	0	0	0	#DIV/0!	#DIV/0!	#DIV/0!
	Central America	6.75978e+06	131601	46828.3	0	127059	95469.1	0	0.0194683	0.00692749	0	0.0187963	0.0141231	0	-0.0345171	1.03871	#DIV/0!
	East Africa	1.04192e+07	216795	28231	0	165583	126669	0	0.0208074	0.00270953	0	0.0158922	0.0121574	0	-0.236223	3.48689	#DIV/0!
	East Asia	7.46648e+06	1.9199e+06	3.9394e+06	0	413063	5.52088e+06	0	0.257136	0.527611	0	0.0553224	0.739422	0	-0.784852	0.401453	#DIV/0!
	Europe	273794	0	0	0	219.6	0	0	0	0	0	0.000802064	0	0	#DIV/0!	#DIV/0!	#DIV/0!
	Middle East and North Africa	1.35053e+06	0	0	0	0	0	0	0	0	0	0	0	0	#DIV/0!	#DIV/0!	#DIV/0!
	north america	6609.5	0	5501.6	0	0	5501.6	0	0	0.832378	0	0	0.832378	0	#DIV/0!	0	#DIV/0!
	Oceania	1.0425e+06	106628	9467.7	0	131117	11145.3	0	0.102281	0.00908177	0	0.125773	0.010691	0	0.229674	0.177192	#DIV/0!
	other	468.768	0	0	0	0	0	0	0	0	0	0	0	0	#DIV/0!	#DIV/0!	#DIV/0!
	South Africa	329158	0	0	0	0	0	0	0	0	0	0	0	0	#DIV/0!	#DIV/0!	#DIV/0!
	South America	1.45219e+07	30379.3	0	0	79610.1	0	0	0.00209196	0	0	0.00548207	0	0	1.62054	#DIV/0!	#DIV/0!
	South Asia	2.33717e+07	1.48365e+06	0	0	2.88758e+06	0	0	0.0634805	0	0	0.12355	0	0	0.946271	#DIV/0!	#DIV/0!
	Southeast Asia	1.59569e+07	3.353e+06	1.57869e+06	0	4.87118e+06	1.95235e+06	0	0.210129	0.098935	0	0.305271	0.122352	0	0.452784	0.236688	#DIV/0!
	West Africa	1.89788e+06	0	0	0	0	0	0	0	0	0	0	0	0	#DIV/0!	#DIV/0!	#DIV/0!
	West Asia	115936	0	0	0	0	0	0	0	0	0	0	0	0	#DIV/0!	#DIV/0!	#DIV/0!
	Grand Total	8.71048e+07	7.3873e+06	6.75221e+06	0	8.88315e+06	8.79371e+06	0	0.0848093	0.0775182	0	0.101982	0.100956	0	0.20249	0.302346	#DIV/0!

## Sheet: RP10
FID	COUNTRY	ISO	region	total production	present_class1	present_class2	present_class3	future_class1	future_class2	future_class3		share_P1	share_P2	share_P3	share_F1	share_F2	share_F3
1	Afghanistan	AF	South Asia	4.6	0	0	0	0	0	0		0	0	0	0	0	0
2	Albania	AL	Europe	7.1	0	0	0	0	0	0		0	0	0	0	0	0
3	Algeria	DZ	Middle East and North Africa	200.2	0	0	0	0	0	0		0	0	0	0	0	0
4	American Samoa	AS	Oceania	0	0	0	0	0	0	0		#DIV/0!	#DIV/0!	#DIV/0!	#DIV/0!	#DIV/0!	#DIV/0!
5	Andorra	AD	Europe	9	0	0	0	0	0	0		0	0	0	0	0	0
6	Angola	AO	Central Africa	1.59868e+06	0	0	0	0	0	0		0	0	0	0	0	0
7	Anguilla	AI	Caribbean	0	0	0	0	0	0	0		#DIV/0!	#DIV/0!	#DIV/0!	#DIV/0!	#DIV/0!	#DIV/0!
9	Antigua and Barbuda	AG	Caribbean	145.1	0	144.2	0	0	144.2	0		0	0.993797	0	0	0.993797	0
10	Argentina	AR	South America	140500	0	0	0	0	0	0		0	0	0	0	0	0
11	Armenia	AM	West Asia	0	0	0	0	0	0	0		#DIV/0!	#DIV/0!	#DIV/0!	#DIV/0!	#DIV/0!	#DIV/0!
12	Aruba	AW	Caribbean	0	0	0	0	0	0	0		#DIV/0!	#DIV/0!	#DIV/0!	#DIV/0!	#DIV/0!	#DIV/0!
13	Australia	AU	Oceania	196539	106628	0	0	130107	1677.6	0		0.542527	0	0	0.66199	0.0085357	0
14	Austria	AT	Europe	0	0	0	0	0	0	0		#DIV/0!	#DIV/0!	#DIV/0!	#DIV/0!	#DIV/0!	#DIV/0!
15	Azerbaijan	AZ	West Asia	0	0	0	0	0	0	0		#DIV/0!	#DIV/0!	#DIV/0!	#DIV/0!	#DIV/0!	#DIV/0!
16	Azores	PT	Europe	0	0	0	0	0	0	0		#DIV/0!	#DIV/0!	#DIV/0!	#DIV/0!	#DIV/0!	#DIV/0!
17	Bahamas	BS	Caribbean	2624.7	654.7	0	0	535	119.7	0		0.249438	0	0	0.203833	0.0456052	0
18	Bahrain	BH	Middle East and North Africa	0	0	0	0	0	0	0		#DIV/0!	#DIV/0!	#DIV/0!	#DIV/0!	#DIV/0!	#DIV/0!
19	Bangladesh	BD	South Asia	732221	0	0	0	1625.9	0	0		0	0	0	0.0022205	0	0
20	Barbados	BB	Caribbean	721.5	0	547.2	0	0	547.2	0		0	0.75842	0	0	0.75842	0
21	Belarus	BY	Europe	0	0	0	0	0	0	0		#DIV/0!	#DIV/0!	#DIV/0!	#DIV/0!	#DIV/0!	#DIV/0!
22	Belgium	BE	Europe	0	0	0	0	0	0	0		#DIV/0!	#DIV/0!	#DIV/0!	#DIV/0!	#DIV/0!	#DIV/0!
23	Belize	BZ	Central America	72980.1	63334.3	0	0	63334.3	0	0		0.86783	0	0	0.86783	0	0
24	Benin	BJ	West Africa	13677.9	0	0	0	0	0	0		0	0	0	0	0	0
25	Bermuda	BM	Caribbean	4.88558	0	5.11578	0	0	5.11578	0		0	1.04712	0	0	1.04712	0
26	Bhutan	BT	South Asia	562	0	0	0	0	0	0		0	0	0	0	0	0
27	Bolivia	BO	South America	127210	0	0	0	0	0	0		0	0	0	0	0	0
28	Bonaire	BQ	Caribbean	0	0	0	0	0	0	0		#DIV/0!	#DIV/0!	#DIV/0!	#DIV/0!	#DIV/0!	#DIV/0!
29	Bosnia and Herzegovina	BA	Europe	0	0	0	0	0	0	0		#DIV/0!	#DIV/0!	#DIV/0!	#DIV/0!	#DIV/0!	#DIV/0!
30	Botswana	BW	South Africa	81.5	0	0	0	0	0	0		0	0	0	0	0	0
31	Bouvet Island	BV	Europe	0	0	0	0	0	0	0		#DIV/0!	#DIV/0!	#DIV/0!	#DIV/0!	#DIV/0!	#DIV/0!
32	Brazil	BR	South America	5.60069e+06	0	0	0	0	0	0		0	0	0	0	0	0
33	British Indian Ocean Territory	IO	South Asia	0	0	0	0	0	0	0		#DIV/0!	#DIV/0!	#DIV/0!	#DIV/0!	#DIV/0!	#DIV/0!
34	British Virgin Islands	VG	Caribbean	16.5498	0	17.3408	0	0	17.3408	0		0	1.04779	0	0	1.04779	0
35	Brunei Darussalam	BN	Southeast Asia	726.1	0	0	0	0	0	0		0	0	0	0	0	0
36	Bulgaria	BG	Europe	23.7	0	0	0	0	0	0		0	0	0	0	0	0
37	Burkina Faso	BF	West Africa	0	0	0	0	0	0	0		#DIV/0!	#DIV/0!	#DIV/0!	#DIV/0!	#DIV/0!	#DIV/0!
38	Burundi	BI	East Africa	1.929e+06	0	0	0	0	0	0		0	0	0	0	0	0
39	Cabo Verde	CV	West Africa	4994.9	0	0	0	0	0	0		0	0	0	0	0	0
40	Cambodia	KH	Southeast Asia	154204	21183.8	0	0	110931	0	0		0.137375	0	0	0.719378	0	0
41	Cameroon	CM	West Africa	1.15725e+06	0	0	0	0	0	0		0	0	0	0	0	0
42	Canada	CA	north america	0	0	0	0	0	0	0		#DIV/0!	#DIV/0!	#DIV/0!	#DIV/0!	#DIV/0!	#DIV/0!
43	Canarias	ES	europe	347.9	0	0	0	0	0	0		0	0	0	0	0	0
44	Cayman Islands	KY	Caribbean	173.6	0	173.6	0	173.6	0	0		0	1	0	1	0	0
45	Central African Republic	CF	central africa	115497	0	0	0	0	0	0		0	0	0	0	0	0
46	Chad	TD	west africa	105.4	0	0	0	0	0	0		0	0	0	0	0	0
47	Chile	CL	South America	0	0	0	0	0	0	0		#DIV/0!	#DIV/0!	#DIV/0!	#DIV/0!	#DIV/0!	#DIV/0!
48	China	CN	East Asia	7.46644e+06	1.9199e+06	3.9394e+06	0	413063	5.52088e+06	0		0.257138	0.527614	0	0.0553227	0.739426	0
49	Christmas Island	CX	oceania	0	0	0	0	0	0	0		#DIV/0!	#DIV/0!	#DIV/0!	#DIV/0!	#DIV/0!	#DIV/0!
50	Cocos Islands	CC	oceania	0	0	0	0	0	0	0		#DIV/0!	#DIV/0!	#DIV/0!	#DIV/0!	#DIV/0!	#DIV/0!
51	Colombia	CO	South America	1.66682e+06	0	0	0	0	0	0		0	0	0	0	0	0
52	Comoros	KM	East Africa	0	0	0	0	0	0	0		#DIV/0!	#DIV/0!	#DIV/0!	#DIV/0!	#DIV/0!	#DIV/0!
53	Congo	CG	Central Africa	73216.1	0	0	0	0	0	0		0	0	0	0	0	0
54	Congo DRC	CD	Central Africa	286948	0	0	0	0	0	0		0	0	0	0	0	0
55	Cook Islands	CK	Oceania	0	0	0	0	0	0	0		#DIV/0!	#DIV/0!	#DIV/0!	#DIV/0!	#DIV/0!	#DIV/0!
56	Costa Rica	CR	Central America	1.857e+06	0	0	0	0	0	0		0	0	0	0	0	0
57	CÃ´te d'Ivoire	CI	West Africa	232461	0	0	0	0	0	0		0	0	0	0	0	0
58	Croatia	HR	Europe	0	0	0	0	0	0	0		#DIV/0!	#DIV/0!	#DIV/0!	#DIV/0!	#DIV/0!	#DIV/0!
59	Cuba	CU	Caribbean	186473	142694	33353.9	0	171541	4507.5	0		0.76523	0.178867	0	0.919925	0.0241724	0
60	Curacao	CW	Caribbean	0	0	0	0	0	0	0		#DIV/0!	#DIV/0!	#DIV/0!	#DIV/0!	#DIV/0!	#DIV/0!
61	Cyprus	CY	Europe	3930	0	0	0	0	0	0		0	0	0	0	0	0
62	Czech Republic	CZ	Europe	0	0	0	0	0	0	0		#DIV/0!	#DIV/0!	#DIV/0!	#DIV/0!	#DIV/0!	#DIV/0!
63	Denmark	DK	Europe	0	0	0	0	0	0	0		#DIV/0!	#DIV/0!	#DIV/0!	#DIV/0!	#DIV/0!	#DIV/0!
64	Djibouti	DJ	East Africa	0	0	0	0	0	0	0		#DIV/0!	#DIV/0!	#DIV/0!	#DIV/0!	#DIV/0!	#DIV/0!
65	Dominica	DM	Caribbean	15155.3	0	12338.3	0	0	12338.3	0		0	0.814124	0	0	0.814124	0
66	Dominican Republic	DO	Caribbean	526289	0	511360	0	0	511360	0		0	0.971632	0	0	0.971632	0
67	Ecuador	EC	South America	6.49479e+06	0	0	0	0	0	0		0	0	0	0	0	0
68	Egypt	EG	Middle East and North Africa	816260	0	0	0	0	0	0		0	0	0	0	0	0
69	El Salvador	SV	Central America	0	0	0	0	0	0	0		#DIV/0!	#DIV/0!	#DIV/0!	#DIV/0!	#DIV/0!	#DIV/0!
70	Equatorial Guinea	GQ	central africa	32549.5	0	0	0	0	0	0		0	0	0	0	0	0
71	Eritrea	ER	East Africa	0.9	0	0	0	0	0	0		0	0	0	0	0	0
72	Estonia	EE	Europe	0	0	0	0	0	0	0		#DIV/0!	#DIV/0!	#DIV/0!	#DIV/0!	#DIV/0!	#DIV/0!
73	Eswatini	SZ	South Africa	4787.6	0	0	0	0	0	0		0	0	0	0	0	0
74	Ethiopia	ET	East Africa	233962	0	0	0	0	0	0		0	0	0	0	0	0
75	Falkland Islands	FK	South America	0	0	0	0	0	0	0		#DIV/0!	#DIV/0!	#DIV/0!	#DIV/0!	#DIV/0!	#DIV/0!
76	Faroe Islands	FO	Europe	0	0	0	0	0	0	0		#DIV/0!	#DIV/0!	#DIV/0!	#DIV/0!	#DIV/0!	#DIV/0!
77	Fiji	FJ	oceania	3013.6	0	0	0	0	0	0		0	0	0	0	0	0
78	Finland	FI	Europe	0	0	0	0	0	0	0		#DIV/0!	#DIV/0!	#DIV/0!	#DIV/0!	#DIV/0!	#DIV/0!
79	France	FR	Europe	9	0	0	0	0	0	0		0	0	0	0	0	0
80	French Guiana	GF	South America	6515.6	0	0	0	0	0	0		0	0	0	0	0	0
81	French Polynesia	PF	oceania	34.1	0	0	0	0	0	0		0	0	0	0	0	0
82	French Southern Territories	TF	other	0	0	0	0	0	0	0		#DIV/0!	#DIV/0!	#DIV/0!	#DIV/0!	#DIV/0!	#DIV/0!
83	Gabon	GA	Central Africa	13455.4	0	0	0	0	0	0		0	0	0	0	0	0
84	Gambia	GM	West Africa	228.5	0	0	0	0	0	0		0	0	0	0	0	0
85	Georgia	GE	West Asia	0	0	0	0	0	0	0		#DIV/0!	#DIV/0!	#DIV/0!	#DIV/0!	#DIV/0!	#DIV/0!
86	Germany	DE	Europe	0	0	0	0	0	0	0		#DIV/0!	#DIV/0!	#DIV/0!	#DIV/0!	#DIV/0!	#DIV/0!
87	Ghana	GH	West Africa	60946	0	0	0	0	0	0		0	0	0	0	0	0
88	Gibraltar	GI	europe	0.203088	0	0	0	0	0	0		0	0	0	0	0	0
89	Glorioso Islands	TF	other	0	0	0	0	0	0	0		#DIV/0!	#DIV/0!	#DIV/0!	#DIV/0!	#DIV/0!	#DIV/0!
90	Greece	GR	europe	2149.5	0	0	0	0	0	0		0	0	0	0	0	0
91	Greenland	GL	europe	0	0	0	0	0	0	0		#DIV/0!	#DIV/0!	#DIV/0!	#DIV/0!	#DIV/0!	#DIV/0!
92	Grenada	GD	Caribbean	313.6	0	313.6	0	0	313.6	0		0	1	0	0	1	0
93	Guadeloupe	GP	Caribbean	39222.5	0	32638.7	0	0	32638.7	0		0	0.832142	0	0	0.832142	0
94	Guam	GU	oceania	287.1	0	0	0	0	0	0		0	0	0	0	0	0
95	Guatemala	GT	Central America	1.97851e+06	0	0	0	0	0	0		0	0	0	0	0	0
96	Guernsey	GG	Europe	0	0	0	0	0	0	0		#DIV/0!	#DIV/0!	#DIV/0!	#DIV/0!	#DIV/0!	#DIV/0!
97	Guinea	GN	West Africa	198890	0	0	0	0	0	0		0	0	0	0	0	0
98	Guinea-Bissau	GW	West Africa	4726.1	0	0	0	0	0	0		0	0	0	0	0	0
99	Guyana	GY	South America	4906.5	0	0	0	0	0	0		0	0	0	0	0	0
100	Haiti	HT	Caribbean	270074	0	264825	0	33494.9	231331	0		0	0.980565	0	0.124021	0.856544	0
101	Heard Island and McDonald Islands	HM	other	0	0	0	0	0	0	0		#DIV/0!	#DIV/0!	#DIV/0!	#DIV/0!	#DIV/0!	#DIV/0!
102	Honduras	HN	Central America	637787	15829.6	0	0	59927.9	0	0		0.0248196	0	0	0.0939622	0	0
103	Hungary	HU	Europe	0	0	0	0	0	0	0		#DIV/0!	#DIV/0!	#DIV/0!	#DIV/0!	#DIV/0!	#DIV/0!
104	Iceland	IS	Europe	0	0	0	0	0	0	0		#DIV/0!	#DIV/0!	#DIV/0!	#DIV/0!	#DIV/0!	#DIV/0!
105	India	IN	South Asia	2.24733e+07	1.48365e+06	0	0	2.88596e+06	0	0		0.0660183	0	0	0.128417	0	0
106	Indonesia	ID	Southeast Asia	4.97488e+06	0	0	0	0	0	0		0	0	0	0	0	0
107	Iran	IR	Middle East and North Africa	73820.8	0	0	0	0	0	0		0	0	0	0	0	0
108	Iraq	IQ	Middle East and North Africa	381.1	0	0	0	0	0	0		0	0	0	0	0	0
109	Ireland	IE	Europe	0	0	0	0	0	0	0		#DIV/0!	#DIV/0!	#DIV/0!	#DIV/0!	#DIV/0!	#DIV/0!
110	Isle of Man	IM	Europe	0	0	0	0	0	0	0		#DIV/0!	#DIV/0!	#DIV/0!	#DIV/0!	#DIV/0!	#DIV/0!
111	Israel	IL	Middle East and North Africa	62937.6	0	0	0	0	0	0		0	0	0	0	0	0
112	Italy	IT	Europe	224.1	0	0	0	0	0	0		0	0	0	0	0	0
113	Jamaica	JM	Caribbean	36808.9	0	36633.7	0	0	36633.7	0		0	0.99524	0	0	0.99524	0
114	Japan	JP	East Asia	36.2	0	0	0	0	0	0		0	0	0	0	0	0
115	Jersey	JE	Europe	0	0	0	0	0	0	0		#DIV/0!	#DIV/0!	#DIV/0!	#DIV/0!	#DIV/0!	#DIV/0!
116	Jordan	JO	Middle East and North Africa	36662.6	0	0	0	0	0	0		0	0	0	0	0	0
117	Juan De Nova Island	TF	other	0	0	0	0	0	0	0		#DIV/0!	#DIV/0!	#DIV/0!	#DIV/0!	#DIV/0!	#DIV/0!
118	Kazakhstan	KZ	West Asia	0	0	0	0	0	0	0		#DIV/0!	#DIV/0!	#DIV/0!	#DIV/0!	#DIV/0!	#DIV/0!
119	Kenya	KE	East Africa	1.19802e+06	0	0	0	0	0	0		0	0	0	0	0	0
120	Kiribati	KI	oceania	0	0	0	0	0	0	0		#DIV/0!	#DIV/0!	#DIV/0!	#DIV/0!	#DIV/0!	#DIV/0!
121	Kuwait	KW	Middle East and North Africa	0	0	0	0	0	0	0		#DIV/0!	#DIV/0!	#DIV/0!	#DIV/0!	#DIV/0!	#DIV/0!
122	Kyrgyzstan	KG	West Asia	0	0	0	0	0	0	0		#DIV/0!	#DIV/0!	#DIV/0!	#DIV/0!	#DIV/0!	#DIV/0!
123	Laos	LA	Southeast Asia	158149	19761.8	0	0	54386.7	30.5	0		0.124957	0	0	0.343896	0.000192856	0
124	Latvia	LV	Europe	0	0	0	0	0	0	0		#DIV/0!	#DIV/0!	#DIV/0!	#DIV/0!	#DIV/0!	#DIV/0!
125	Lebanon	LB	Middle East and North Africa	50679.7	0	0	0	0	0	0		0	0	0	0	0	0
126	Lesotho	LS	South Africa	80.4	0	0	0	0	0	0		0	0	0	0	0	0
127	Liberia	LR	West Africa	106328	0	0	0	0	0	0		0	0	0	0	0	0
128	Libya	LY	Middle East and North Africa	0	0	0	0	0	0	0		#DIV/0!	#DIV/0!	#DIV/0!	#DIV/0!	#DIV/0!	#DIV/0!
129	Liechtenstein	LI	Europe	0	0	0	0	0	0	0		#DIV/0!	#DIV/0!	#DIV/0!	#DIV/0!	#DIV/0!	#DIV/0!
130	Lithuania	LT	Europe	0	0	0	0	0	0	0		#DIV/0!	#DIV/0!	#DIV/0!	#DIV/0!	#DIV/0!	#DIV/0!
131	Luxembourg	LU	Europe	0	0	0	0	0	0	0		#DIV/0!	#DIV/0!	#DIV/0!	#DIV/0!	#DIV/0!	#DIV/0!
132	Madagascar	MG	East Africa	267985	216795	21646.4	0	124590	120085	0		0.808982	0.0807747	0	0.464912	0.448103	0
133	Madeira	PT	Europe	0	0	0	0	0	0	0		#DIV/0!	#DIV/0!	#DIV/0!	#DIV/0!	#DIV/0!	#DIV/0!
134	Malawi	MW	East Africa	365517	0	0	0	0	0	0		0	0	0	0	0	0
135	Malaysia	MY	Southeast Asia	268665	0	0	0	0	0	0		0	0	0	0	0	0
136	Maldives	MV	South Asia	40.3328	0	0	0	0	0	0		0	0	0	0	0	0
137	Mali	ML	West Africa	45560.7	0	0	0	0	0	0		0	0	0	0	0	0
138	Malta	MT	europe	0	0	0	0	0	0	0		#DIV/0!	#DIV/0!	#DIV/0!	#DIV/0!	#DIV/0!	#DIV/0!
139	Marshall Islands	MH	oceania	0	0	0	0	0	0	0		#DIV/0!	#DIV/0!	#DIV/0!	#DIV/0!	#DIV/0!	#DIV/0!
140	Martinique	MQ	Caribbean	208737	0	157982	0	0	157982	0		0	0.756847	0	0	0.756847	0
141	Mauritania	MR	West Africa	0	0	0	0	0	0	0		#DIV/0!	#DIV/0!	#DIV/0!	#DIV/0!	#DIV/0!	#DIV/0!
142	Mauritius	MU	East Africa	7272.9	0	6584.6	0	0	6584.6	0		0	0.905361	0	0	0.905361	0
143	Mayotte	YT	East Africa	0	0	0	0	0	0	0		#DIV/0!	#DIV/0!	#DIV/0!	#DIV/0!	#DIV/0!	#DIV/0!
144	Mexico	MX	central america	1.91677e+06	52437.6	46828.3	0	3796.8	95469.1	0		0.0273573	0.0244308	0	0.00198083	0.0498072	0
145	Micronesia	FM	oceania	357.9	0	0	0	238.1	0	0		0	0	0	0.66527	0	0
146	Moldova	MD	Europe	0	0	0	0	0	0	0		#DIV/0!	#DIV/0!	#DIV/0!	#DIV/0!	#DIV/0!	#DIV/0!
147	Monaco	MC	Europe	0	0	0	0	0	0	0		#DIV/0!	#DIV/0!	#DIV/0!	#DIV/0!	#DIV/0!	#DIV/0!
148	Mongolia	MN	East Asia	0	0	0	0	0	0	0		#DIV/0!	#DIV/0!	#DIV/0!	#DIV/0!	#DIV/0!	#DIV/0!
149	Montenegro	ME	Europe	0	0	0	0	0	0	0		#DIV/0!	#DIV/0!	#DIV/0!	#DIV/0!	#DIV/0!	#DIV/0!
150	Montserrat	MS	Caribbean	138	0	138	0	0	138	0		0	1	0	0	1	0
151	Morocco	MA	Middle East and North Africa	187680	0	0	0	0	0	0		0	0	0	0	0	0
152	Mozambique	MZ	East Africa	245445	0	0	0	40993.6	0	0		0	0	0	0.167017	0	0
153	Myanmar	MM	Southeast Asia	11612.7	0	0	0	0	0	0		0	0	0	0	0	0
154	Namibia	NA	South Africa	27302.8	0	0	0	0	0	0		0	0	0	0	0	0
155	Nauru	NR	oceania	0	0	0	0	0	0	0		#DIV/0!	#DIV/0!	#DIV/0!	#DIV/0!	#DIV/0!	#DIV/0!
156	Nepal	NP	south asia	65043.4	0	0	0	0	0	0		0	0	0	0	0	0
157	Netherlands	NL	Europe	0	0	0	0	0	0	0		#DIV/0!	#DIV/0!	#DIV/0!	#DIV/0!	#DIV/0!	#DIV/0!
158	New Caledonia	NC	oceania	688.2	0	619	0	0	619	0		0	0.899448	0	0	0.899448	0
159	New Zealand	NZ	oceania	0	0	0	0	0	0	0		#DIV/0!	#DIV/0!	#DIV/0!	#DIV/0!	#DIV/0!	#DIV/0!
160	Nicaragua	NI	central america	40000.2	0	0	0	0	0	0		0	0	0	0	0	0
161	Niger	NE	West Africa	86.3	0	0	0	0	0	0		0	0	0	0	0	0
162	Nigeria	NG	West Africa	1610.6	0	0	0	0	0	0		0	0	0	0	0	0
163	Niue	NU	oceania	80	0	0	0	0	0	0		0	0	0	0	0	0
164	Norfolk Island	NF	other	0	0	0	0	0	0	0		#DIV/0!	#DIV/0!	#DIV/0!	#DIV/0!	#DIV/0!	#DIV/0!
165	North Korea	KP	East Asia	0	0	0	0	0	0	0		#DIV/0!	#DIV/0!	#DIV/0!	#DIV/0!	#DIV/0!	#DIV/0!
166	North Macedonia	MK	Europe	2.4	0	0	0	0	0	0		0	0	0	0	0	0
167	Northern Mariana Islands	MP	oceania	0	0	0	0	0	0	0		#DIV/0!	#DIV/0!	#DIV/0!	#DIV/0!	#DIV/0!	#DIV/0!
168	Norway	NO	Europe	0	0	0	0	0	0	0		#DIV/0!	#DIV/0!	#DIV/0!	#DIV/0!	#DIV/0!	#DIV/0!
169	Oman	OM	Middle East and North Africa	28080	0	0	0	0	0	0		0	0	0	0	0	0
170	Pakistan	PK	South Asia	100170	0	0	0	0	0	0		0	0	0	0	0	0
171	Palau	PW	oceania	0	0	0	0	0	0	0		#DIV/0!	#DIV/0!	#DIV/0!	#DIV/0!	#DIV/0!	#DIV/0!
172	Palestinian Territory	PS	Middle East and North Africa	940	0	0	0	0	0	0		0	0	0	0	0	0
173	Panama	PA	central america	256733	0	0	0	0	0	0		0	0	0	0	0	0
174	Papua New Guinea	PG	oceania	830337	0	0	0	772.2	0	0		0	0	0	0.000929984	0	0
175	Paraguay	PY	South America	57529.1	0	0	0	0	0	0		0	0	0	0	0	0
176	Peru	PE	South America	66380.2	0	0	0	0	0	0		0	0	0	0	0	0
177	Philippines	PH	Southeast Asia	7.83521e+06	2.65134e+06	1.44285e+06	0	3.99312e+06	1.48816e+06	0		0.338388	0.18415	0	0.509638	0.189933	0
178	Pitcairn	PN	other	0	0	0	0	0	0	0		#DIV/0!	#DIV/0!	#DIV/0!	#DIV/0!	#DIV/0!	#DIV/0!
179	Poland	PL	Europe	0	0	0	0	0	0	0		#DIV/0!	#DIV/0!	#DIV/0!	#DIV/0!	#DIV/0!	#DIV/0!
180	Portugal	PT	Europe	18164.9	0	0	0	219.6	0	0		0	0	0	0.0120892	0	0
181	Puerto Rico	PR	Caribbean	45995.3	0	39681.8	0	0	39681.8	0		0	0.862736	0	0	0.862736	0
182	Qatar	QA	Middle East and North Africa	0	0	0	0	0	0	0		#DIV/0!	#DIV/0!	#DIV/0!	#DIV/0!	#DIV/0!	#DIV/0!
183	RÃ©union	RE	other	0	0	0	0	0	0	0		#DIV/0!	#DIV/0!	#DIV/0!	#DIV/0!	#DIV/0!	#DIV/0!
184	Romania	RO	europe	0	0	0	0	0	0	0		#DIV/0!	#DIV/0!	#DIV/0!	#DIV/0!	#DIV/0!	#DIV/0!
185	Russian Federation	RU	europe	0	0	0	0	0	0	0		#DIV/0!	#DIV/0!	#DIV/0!	#DIV/0!	#DIV/0!	#DIV/0!
186	Rwanda	RW	East Africa	2.2932e+06	0	0	0	0	0	0		0	0	0	0	0	0
187	Saba	BQ	Caribbean	0	0	0	0	0	0	0		#DIV/0!	#DIV/0!	#DIV/0!	#DIV/0!	#DIV/0!	#DIV/0!
188	Saint Barthelemy	BL	Caribbean	0	0	0	0	0	0	0		#DIV/0!	#DIV/0!	#DIV/0!	#DIV/0!	#DIV/0!	#DIV/0!
189	Saint Eustatius	BQ	Caribbean	0	0	0	0	0	0	0		#DIV/0!	#DIV/0!	#DIV/0!	#DIV/0!	#DIV/0!	#DIV/0!
190	Saint Helena	SH	other	0	0	0	0	0	0	0		#DIV/0!	#DIV/0!	#DIV/0!	#DIV/0!	#DIV/0!	#DIV/0!
191	Saint Kitts and Nevis	KN	Caribbean	0	0	0	0	0	0	0		#DIV/0!	#DIV/0!	#DIV/0!	#DIV/0!	#DIV/0!	#DIV/0!
192	Saint Lucia	LC	Caribbean	19704.2	0	16937.7	0	0	16937.7	0		0	0.859598	0	0	0.859598	0
193	Saint Martin	MF	Caribbean	0	0	0	0	0	0	0		#DIV/0!	#DIV/0!	#DIV/0!	#DIV/0!	#DIV/0!	#DIV/0!
194	Saint Pierre and Miquelon	PM	north america	0	0	0	0	0	0	0		#DIV/0!	#DIV/0!	#DIV/0!	#DIV/0!	#DIV/0!	#DIV/0!
195	Saint Vincent and the Grenadines	VC	Caribbean	37001.6	0	37001.6	0	0	37001.6	0		0	1	0	0	1	0
196	Samoa	WS	oceania	0	0	0	0	0	0	0		#DIV/0!	#DIV/0!	#DIV/0!	#DIV/0!	#DIV/0!	#DIV/0!
197	San Marino	SM	Europe	0	0	0	0	0	0	0		#DIV/0!	#DIV/0!	#DIV/0!	#DIV/0!	#DIV/0!	#DIV/0!
198	Sao Tome and Principe	ST	west africa	21101.9	0	0	0	0	0	0		0	0	0	0	0	0
199	Saudi Arabia	SA	Middle East and North Africa	0	0	0	0	0	0	0		#DIV/0!	#DIV/0!	#DIV/0!	#DIV/0!	#DIV/0!	#DIV/0!
200	Senegal	SN	West Africa	29992.3	0	0	0	0	0	0		0	0	0	0	0	0
201	Serbia	RS	Europe	0	0	0	0	0	0	0		#DIV/0!	#DIV/0!	#DIV/0!	#DIV/0!	#DIV/0!	#DIV/0!
202	Seychelles	SC	south asia	401	0	0	0	0	0	0		0	0	0	0	0	0
203	Sierra Leone	SL	West Africa	1422.5	0	0	0	0	0	0		0	0	0	0	0	0
204	Singapore	SG	Southeast Asia	0	0	0	0	0	0	0		#DIV/0!	#DIV/0!	#DIV/0!	#DIV/0!	#DIV/0!	#DIV/0!
205	Sint Maarten	SX	Caribbean	0	0	0	0	0	0	0		#DIV/0!	#DIV/0!	#DIV/0!	#DIV/0!	#DIV/0!	#DIV/0!
206	Slovakia	SK	Europe	0	0	0	0	0	0	0		#DIV/0!	#DIV/0!	#DIV/0!	#DIV/0!	#DIV/0!	#DIV/0!
207	Slovenia	SI	Europe	0	0	0	0	0	0	0		#DIV/0!	#DIV/0!	#DIV/0!	#DIV/0!	#DIV/0!	#DIV/0!
208	Solomon Islands	SB	oceania	197.7	0	0	0	0	0	0		0	0	0	0	0	0
209	Somalia	SO	East Africa	22114.1	0	0	0	0	0	0		0	0	0	0	0	0
210	South Africa	ZA	South Africa	296905	0	0	0	0	0	0		0	0	0	0	0	0
211	South Georgia and South Sandwich Islands	GS	other	0	0	0	0	0	0	0		#DIV/0!	#DIV/0!	#DIV/0!	#DIV/0!	#DIV/0!	#DIV/0!
212	South Korea	KR	East Asia	0	0	0	0	0	0	0		#DIV/0!	#DIV/0!	#DIV/0!	#DIV/0!	#DIV/0!	#DIV/0!
213	South Sudan	SS	East Africa	511344	0	0	0	0	0	0		0	0	0	0	0	0
214	Spain	ES	Europe	248926	0	0	0	0	0	0		0	0	0	0	0	0
215	Sri Lanka	LK	south asia	0	0	0	0	0	0	0		#DIV/0!	#DIV/0!	#DIV/0!	#DIV/0!	#DIV/0!	#DIV/0!
216	Sudan	SD	Middle East and North Africa	1870.5	0	0	0	0	0	0		0	0	0	0	0	0
217	Suriname	SR	Caribbean	78910.4	0	0	0	0	0	0		0	0	0	0	0	0
218	Svalbard	SJ	Europe	0	0	0	0	0	0	0		#DIV/0!	#DIV/0!	#DIV/0!	#DIV/0!	#DIV/0!	#DIV/0!
219	Sweden	SE	Europe	0	0	0	0	0	0	0		#DIV/0!	#DIV/0!	#DIV/0!	#DIV/0!	#DIV/0!	#DIV/0!
220	Switzerland	CH	Europe	0	0	0	0	0	0	0		#DIV/0!	#DIV/0!	#DIV/0!	#DIV/0!	#DIV/0!	#DIV/0!
221	Syria	SY	Middle East and North Africa	167.9	0	0	0	0	0	0		0	0	0	0	0	0
222	Tajikistan	TJ	West Asia	0	0	0	0	0	0	0		#DIV/0!	#DIV/0!	#DIV/0!	#DIV/0!	#DIV/0!	#DIV/0!
223	Tanzania	TZ	east africa	2.72944e+06	0	0	0	0	0	0		0	0	0	0	0	0
224	Thailand	TH	Southeast Asia	1.24567e+06	0	0	0	32291.3	0	0		0	0	0	0.0259229	0	0
225	Timor-Leste	TL	Southeast Asia	553	0	0	0	0	0	0		0	0	0	0	0	0
226	Togo	TG	West Africa	18506.4	0	0	0	0	0	0		0	0	0	0	0	0
227	Tokelau	TK	oceania	0	0	0	0	0	0	0		#DIV/0!	#DIV/0!	#DIV/0!	#DIV/0!	#DIV/0!	#DIV/0!
228	Tonga	TO	oceania	34.1249	0	0	0	0	0	0		0	0	0	0	0	0
229	Trinidad and Tobago	TT	Caribbean	3156.9	1995.5	0	0	1995.5	0	0		0.632107	0	0	0.632107	0	0
230	Tunisia	TN	Middle East and North Africa	0	0	0	0	0	0	0		#DIV/0!	#DIV/0!	#DIV/0!	#DIV/0!	#DIV/0!	#DIV/0!
231	Turkiye	TR	West Asia	115865	0	0	0	0	0	0		0	0	0	0	0	0
232	Turkmenistan	TM	West Asia	70.1	0	0	0	0	0	0		0	0	0	0	0	0
233	Turks and Caicos Islands	TC	Caribbean	0	0	0	0	0	0	0		#DIV/0!	#DIV/0!	#DIV/0!	#DIV/0!	#DIV/0!	#DIV/0!
234	Tuvalu	TV	oceania	0	0	0	0	0	0	0		#DIV/0!	#DIV/0!	#DIV/0!	#DIV/0!	#DIV/0!	#DIV/0!
235	Uganda	UG	east africa	538001	0	0	0	0	0	0		0	0	0	0	0	0
236	Ukraine	UA	Europe	0	0	0	0	0	0	0		#DIV/0!	#DIV/0!	#DIV/0!	#DIV/0!	#DIV/0!	#DIV/0!
237	United Arab Emirates	AE	Middle East and North Africa	178.9	0	0	0	0	0	0		0	0	0	0	0	0
238	United Kingdom	GB	Europe	0	0	0	0	0	0	0		#DIV/0!	#DIV/0!	#DIV/0!	#DIV/0!	#DIV/0!	#DIV/0!
239	United States	US	north america	6609.5	0	5501.6	0	0	5501.6	0		0	0.832378	0	0	0.832378	0
240	United States Minor Outlying Islands	UM	other	0	0	0	0	0	0	0		#DIV/0!	#DIV/0!	#DIV/0!	#DIV/0!	#DIV/0!	#DIV/0!
241	Uruguay	UY	South America	0	0	0	0	0	0	0		#DIV/0!	#DIV/0!	#DIV/0!	#DIV/0!	#DIV/0!	#DIV/0!
242	US Virgin Islands	VI	Caribbean	0	0	0	0	0	0	0		#DIV/0!	#DIV/0!	#DIV/0!	#DIV/0!	#DIV/0!	#DIV/0!
243	Uzbekistan	UZ	west asia	0	0	0	0	0	0	0		#DIV/0!	#DIV/0!	#DIV/0!	#DIV/0!	#DIV/0!	#DIV/0!
244	Vanuatu	VU	oceania	10925.8	0	8848.7	0	0	8848.7	0		0	0.80989	0	0	0.80989	0
245	Vatican City	VA	Europe	0	0	0	0	0	0	0		#DIV/0!	#DIV/0!	#DIV/0!	#DIV/0!	#DIV/0!	#DIV/0!
246	Venezuela	VE	South America	356557	30379.3	0	0	79610.1	0	0		0.0852017	0	0	0.223274	0	0
247	Vietnam	VN	Southeast Asia	1.30723e+06	660709	135844	0	680452	464160	0		0.505427	0.103918	0	0.52053	0.355072	0
248	Wallis and Futuna	WF	other	468.768	0	0	0	0	0	0		0	0	0	0	0	0
249	Yemen	YE	Middle East and North Africa	90666	0	0	0	0	0	0		0	0	0	0	0	0
250	Zambia	ZM	East Africa	2211.9	0	0	0	0	0	0		0	0	0	0	0	0
251	Zimbabwe	ZW	East Africa	75643.5	0	0	0	0	0	0		0	0	0	0	0	0

## Sheet: RP100
FID	COUNTRY	ISO	region	total production	present_class1	present_class2	present_class3	future_class1	future_class2	future_class3		share_P1	share_P2	share_P3	share_F1	share_F2	share_F3
1	Afghanistan	AF	South Asia	4.6	0	0	0	0	0	0		0	0	0	0	0	0
2	Albania	AL	Europe	7.1	0	0	0	0	0	0		0	0	0	0	0	0
3	Algeria	DZ	Middle East and North Africa	200.2	0	0	0	0	0	0		0	0	0	0	0	0
4	American Samoa	AS	Oceania	0	0	0	0	0	0	0		#DIV/0!	#DIV/0!	#DIV/0!	#DIV/0!	#DIV/0!	#DIV/0!
5	Andorra	AD	Europe	9	0	0	0	0	0	0		0	0	0	0	0	0
6	Angola	AO	Central Africa	1.59868e+06	0	0	0	0	0	0		0	0	0	0	0	0
7	Anguilla	AI	Caribbean	0	0	0	0	0	0	0		#DIV/0!	#DIV/0!	#DIV/0!	#DIV/0!	#DIV/0!	#DIV/0!
9	Antigua and Barbuda	AG	Caribbean	145.1	0	0	144.2	0	0	144.2		0	0	0.993797	0	0	0.993797
10	Argentina	AR	South America	140500	0	0	0	0	0	0		0	0	0	0	0	0
11	Armenia	AM	West Asia	0	0	0	0	0	0	0		#DIV/0!	#DIV/0!	#DIV/0!	#DIV/0!	#DIV/0!	#DIV/0!
12	Aruba	AW	Caribbean	0	0	0	0	0	0	0		#DIV/0!	#DIV/0!	#DIV/0!	#DIV/0!	#DIV/0!	#DIV/0!
13	Australia	AU	Oceania	196539	430.9	137520	0	830.8	137855	0		0.00219244	0.699708	0	0.00422714	0.701412	0
14	Austria	AT	Europe	0	0	0	0	0	0	0		#DIV/0!	#DIV/0!	#DIV/0!	#DIV/0!	#DIV/0!	#DIV/0!
15	Azerbaijan	AZ	West Asia	0	0	0	0	0	0	0		#DIV/0!	#DIV/0!	#DIV/0!	#DIV/0!	#DIV/0!	#DIV/0!
16	Azores	PT	Europe	0	0	0	0	0	0	0		#DIV/0!	#DIV/0!	#DIV/0!	#DIV/0!	#DIV/0!	#DIV/0!
17	Bahamas	BS	Caribbean	2624.7	0	0	654.7	0	0	654.7		0	0	0.249438	0	0	0.249438
18	Bahrain	BH	Middle East and North Africa	0	0	0	0	0	0	0		#DIV/0!	#DIV/0!	#DIV/0!	#DIV/0!	#DIV/0!	#DIV/0!
19	Bangladesh	BD	South Asia	732221	24264.9	538709	6468.3	141567	427875	0		0.0331388	0.735719	0.00883381	0.193339	0.584353	0
20	Barbados	BB	Caribbean	721.5	0	0	547.2	0	0	547.2		0	0	0.75842	0	0	0.75842
21	Belarus	BY	Europe	0	0	0	0	0	0	0		#DIV/0!	#DIV/0!	#DIV/0!	#DIV/0!	#DIV/0!	#DIV/0!
22	Belgium	BE	Europe	0	0	0	0	0	0	0		#DIV/0!	#DIV/0!	#DIV/0!	#DIV/0!	#DIV/0!	#DIV/0!
23	Belize	BZ	Central America	72980.1	0	63334.3	0	0	63137.3	197		0	0.86783	0	0	0.86513	0.00269937
24	Benin	BJ	West Africa	13677.9	0	0	0	0	0	0		0	0	0	0	0	0
25	Bermuda	BM	Caribbean	4.88558	0	0	5.11578	0	0	5.11578		0	0	1.04712	0	0	1.04712
26	Bhutan	BT	South Asia	562	0	0	0	0	0	0		0	0	0	0	0	0
27	Bolivia	BO	South America	127210	0	0	0	0	0	0		0	0	0	0	0	0
28	Bonaire	BQ	Caribbean	0	0	0	0	0	0	0		#DIV/0!	#DIV/0!	#DIV/0!	#DIV/0!	#DIV/0!	#DIV/0!
29	Bosnia and Herzegovina	BA	Europe	0	0	0	0	0	0	0		#DIV/0!	#DIV/0!	#DIV/0!	#DIV/0!	#DIV/0!	#DIV/0!
30	Botswana	BW	South Africa	81.5	0	0	0	0	0	0		0	0	0	0	0	0
31	Bouvet Island	BV	Europe	0	0	0	0	0	0	0		#DIV/0!	#DIV/0!	#DIV/0!	#DIV/0!	#DIV/0!	#DIV/0!
32	Brazil	BR	South America	5.60069e+06	0	0	0	0	0	0		0	0	0	0	0	0
33	British Indian Ocean Territory	IO	South Asia	0	0	0	0	0	0	0		#DIV/0!	#DIV/0!	#DIV/0!	#DIV/0!	#DIV/0!	#DIV/0!
34	British Virgin Islands	VG	Caribbean	16.5498	0	0	17.3408	0	0	17.3408		0	0	1.04779	0	0	1.04779
35	Brunei Darussalam	BN	Southeast Asia	726.1	0	0	0	0	0	0		0	0	0	0	0	0
36	Bulgaria	BG	Europe	23.7	0	0	0	0	0	0		0	0	0	0	0	0
37	Burkina Faso	BF	West Africa	0	0	0	0	0	0	0		#DIV/0!	#DIV/0!	#DIV/0!	#DIV/0!	#DIV/0!	#DIV/0!
38	Burundi	BI	East Africa	1.929e+06	0	0	0	0	0	0		0	0	0	0	0	0
39	Cabo Verde	CV	West Africa	4994.9	0	3459.9	0	0	3459.9	0		0	0.692687	0	0	0.692687	0
40	Cambodia	KH	Southeast Asia	154204	73336.3	68130.5	0	36756.5	106470	0		0.47558	0.441821	0	0.238363	0.690446	0
41	Cameroon	CM	West Africa	1.15725e+06	0	0	0	0	0	0		0	0	0	0	0	0
42	Canada	CA	north america	0	0	0	0	0	0	0		#DIV/0!	#DIV/0!	#DIV/0!	#DIV/0!	#DIV/0!	#DIV/0!
43	Canarias	ES	europe	347.9	307.2	0	0	0	307.2	0		0.883012	0	0	0	0.883012	0
44	Cayman Islands	KY	Caribbean	173.6	0	0	173.6	0	0	173.6		0	0	1	0	0	1
45	Central African Republic	CF	central africa	115497	0	0	0	0	0	0		0	0	0	0	0	0
46	Chad	TD	west africa	105.4	0	0	0	0	0	0		0	0	0	0	0	0
47	Chile	CL	South America	0	0	0	0	0	0	0		#DIV/0!	#DIV/0!	#DIV/0!	#DIV/0!	#DIV/0!	#DIV/0!
48	China	CN	East Asia	7.46644e+06	576860	5.63428e+06	223277	857105	4.93782e+06	990271		0.0772604	0.754614	0.029904	0.114794	0.661335	0.13263
49	Christmas Island	CX	oceania	0	0	0	0	0	0	0		#DIV/0!	#DIV/0!	#DIV/0!	#DIV/0!	#DIV/0!	#DIV/0!
50	Cocos Islands	CC	oceania	0	0	0	0	0	0	0		#DIV/0!	#DIV/0!	#DIV/0!	#DIV/0!	#DIV/0!	#DIV/0!
51	Colombia	CO	South America	1.66682e+06	324230	23332.1	0	324230	23332.1	0		0.19452	0.013998	0	0.19452	0.013998	0
52	Comoros	KM	East Africa	0	0	0	0	0	0	0		#DIV/0!	#DIV/0!	#DIV/0!	#DIV/0!	#DIV/0!	#DIV/0!
53	Congo	CG	Central Africa	73216.1	0	0	0	0	0	0		0	0	0	0	0	0
54	Congo DRC	CD	Central Africa	286948	0	0	0	0	0	0		0	0	0	0	0	0
55	Cook Islands	CK	Oceania	0	0	0	0	0	0	0		#DIV/0!	#DIV/0!	#DIV/0!	#DIV/0!	#DIV/0!	#DIV/0!
56	Costa Rica	CR	Central America	1.857e+06	1.57249e+06	0	0	1.66713e+06	0	0		0.846792	0	0	0.897755	0	0
57	CÃ´te d'Ivoire	CI	West Africa	232461	0	0	0	0	0	0		0	0	0	0	0	0
58	Croatia	HR	Europe	0	0	0	0	0	0	0		#DIV/0!	#DIV/0!	#DIV/0!	#DIV/0!	#DIV/0!	#DIV/0!
59	Cuba	CU	Caribbean	186473	0	110519	65556.5	0	101192	74884.1		0	0.592683	0.351561	0	0.542661	0.401582
60	Curacao	CW	Caribbean	0	0	0	0	0	0	0		#DIV/0!	#DIV/0!	#DIV/0!	#DIV/0!	#DIV/0!	#DIV/0!
61	Cyprus	CY	Europe	3930	0	0	0	0	0	0		0	0	0	0	0	0
62	Czech Republic	CZ	Europe	0	0	0	0	0	0	0		#DIV/0!	#DIV/0!	#DIV/0!	#DIV/0!	#DIV/0!	#DIV/0!
63	Denmark	DK	Europe	0	0	0	0	0	0	0		#DIV/0!	#DIV/0!	#DIV/0!	#DIV/0!	#DIV/0!	#DIV/0!
64	Djibouti	DJ	East Africa	0	0	0	0	0	0	0		#DIV/0!	#DIV/0!	#DIV/0!	#DIV/0!	#DIV/0!	#DIV/0!
65	Dominica	DM	Caribbean	15155.3	0	0	12338.3	0	0	12338.3		0	0	0.814124	0	0	0.814124
66	Dominican Republic	DO	Caribbean	526289	0	88026.8	423333	0	213018	298341		0	0.167259	0.804373	0	0.404755	0.566877
67	Ecuador	EC	South America	6.49479e+06	0	0	0	0	0	0		0	0	0	0	0	0
68	Egypt	EG	Middle East and North Africa	816260	0	0	0	0	0	0		0	0	0	0	0	0
69	El Salvador	SV	Central America	0	0	0	0	0	0	0		#DIV/0!	#DIV/0!	#DIV/0!	#DIV/0!	#DIV/0!	#DIV/0!
70	Equatorial Guinea	GQ	central africa	32549.5	0	0	0	0	0	0		0	0	0	0	0	0
71	Eritrea	ER	East Africa	0.9	0	0	0	0	0	0		0	0	0	0	0	0
72	Estonia	EE	Europe	0	0	0	0	0	0	0		#DIV/0!	#DIV/0!	#DIV/0!	#DIV/0!	#DIV/0!	#DIV/0!
73	Eswatini	SZ	South Africa	4787.6	183.9	0	0	4050.4	0	0		0.0384117	0	0	0.846019	0	0
74	Ethiopia	ET	East Africa	233962	0	0	0	0	0	0		0	0	0	0	0	0
75	Falkland Islands	FK	South America	0	0	0	0	0	0	0		#DIV/0!	#DIV/0!	#DIV/0!	#DIV/0!	#DIV/0!	#DIV/0!
76	Faroe Islands	FO	Europe	0	0	0	0	0	0	0		#DIV/0!	#DIV/0!	#DIV/0!	#DIV/0!	#DIV/0!	#DIV/0!
77	Fiji	FJ	oceania	3013.6	0	0	0	0	0	0		0	0	0	0	0	0
78	Finland	FI	Europe	0	0	0	0	0	0	0		#DIV/0!	#DIV/0!	#DIV/0!	#DIV/0!	#DIV/0!	#DIV/0!
79	France	FR	Europe	9	0	0	0	0	0	0		0	0	0	0	0	0
80	French Guiana	GF	South America	6515.6	0	0	0	0	0	0		0	0	0	0	0	0
81	French Polynesia	PF	oceania	34.1	0	0	0	0	0	0		0	0	0	0	0	0
82	French Southern Territories	TF	other	0	0	0	0	0	0	0		#DIV/0!	#DIV/0!	#DIV/0!	#DIV/0!	#DIV/0!	#DIV/0!
83	Gabon	GA	Central Africa	13455.4	0	0	0	0	0	0		0	0	0	0	0	0
84	Gambia	GM	West Africa	228.5	0	0	0	0	0	0		0	0	0	0	0	0
85	Georgia	GE	West Asia	0	0	0	0	0	0	0		#DIV/0!	#DIV/0!	#DIV/0!	#DIV/0!	#DIV/0!	#DIV/0!
86	Germany	DE	Europe	0	0	0	0	0	0	0		#DIV/0!	#DIV/0!	#DIV/0!	#DIV/0!	#DIV/0!	#DIV/0!
87	Ghana	GH	West Africa	60946	0	0	0	0	0	0		0	0	0	0	0	0
88	Gibraltar	GI	europe	0.203088	0	0	0	0	0	0		0	0	0	0	0	0
89	Glorioso Islands	TF	other	0	0	0	0	0	0	0		#DIV/0!	#DIV/0!	#DIV/0!	#DIV/0!	#DIV/0!	#DIV/0!
90	Greece	GR	europe	2149.5	0	0	0	0	0	0		0	0	0	0	0	0
91	Greenland	GL	europe	0	0	0	0	0	0	0		#DIV/0!	#DIV/0!	#DIV/0!	#DIV/0!	#DIV/0!	#DIV/0!
92	Grenada	GD	Caribbean	313.6	0	313.6	0	0	0	313.6		0	1	0	0	0	1
93	Guadeloupe	GP	Caribbean	39222.5	0	0	32638.7	0	0	32638.7		0	0	0.832142	0	0	0.832142
94	Guam	GU	oceania	287.1	0	0	0	0	0	0		0	0	0	0	0	0
95	Guatemala	GT	Central America	1.97851e+06	114150	217647	0	129230	171094	0		0.057695	0.110005	0	0.065317	0.0864762	0
96	Guernsey	GG	Europe	0	0	0	0	0	0	0		#DIV/0!	#DIV/0!	#DIV/0!	#DIV/0!	#DIV/0!	#DIV/0!
97	Guinea	GN	West Africa	198890	0	0	0	0	0	0		0	0	0	0	0	0
98	Guinea-Bissau	GW	West Africa	4726.1	0	0	0	275.6	0	0		0	0	0	0.0583145	0	0
99	Guyana	GY	South America	4906.5	196.1	0	0	1100.6	0	0		0.0399674	0	0	0.224315	0	0
100	Haiti	HT	Caribbean	270074	0	85798.1	179027	0	114156	150669		0	0.317683	0.662881	0	0.422684	0.55788
101	Heard Island and McDonald Islands	HM	other	0	0	0	0	0	0	0		#DIV/0!	#DIV/0!	#DIV/0!	#DIV/0!	#DIV/0!	#DIV/0!
102	Honduras	HN	Central America	637787	161350	388264	0	69621.2	224044	0		0.252984	0.608767	0	0.109161	0.351283	0
103	Hungary	HU	Europe	0	0	0	0	0	0	0		#DIV/0!	#DIV/0!	#DIV/0!	#DIV/0!	#DIV/0!	#DIV/0!
104	Iceland	IS	Europe	0	0	0	0	0	0	0		#DIV/0!	#DIV/0!	#DIV/0!	#DIV/0!	#DIV/0!	#DIV/0!
105	India	IN	South Asia	2.24733e+07	7.81396e+06	9.2279e+06	147657	8.38052e+06	9.40743e+06	0		0.3477	0.410616	0.00657032	0.37291	0.418605	0
106	Indonesia	ID	Southeast Asia	4.97488e+06	131537	11857.5	0	1.07871e+06	65293.4	0		0.0264403	0.00238348	0	0.216832	0.0131246	0
107	Iran	IR	Middle East and North Africa	73820.8	0	188.6	0	370.1	188.6	0		0	0.00255484	0	0.00501349	0.00255484	0
108	Iraq	IQ	Middle East and North Africa	381.1	0	0	0	0	0	0		0	0	0	0	0	0
109	Ireland	IE	Europe	0	0	0	0	0	0	0		#DIV/0!	#DIV/0!	#DIV/0!	#DIV/0!	#DIV/0!	#DIV/0!
110	Isle of Man	IM	Europe	0	0	0	0	0	0	0		#DIV/0!	#DIV/0!	#DIV/0!	#DIV/0!	#DIV/0!	#DIV/0!
111	Israel	IL	Middle East and North Africa	62937.6	0	0	0	0	0	0		0	0	0	0	0	0
112	Italy	IT	Europe	224.1	0	0	0	0	0	0		0	0	0	0	0	0
113	Jamaica	JM	Caribbean	36808.9	0	0	36633.7	0	0	36633.7		0	0	0.99524	0	0	0.99524
114	Japan	JP	East Asia	36.2	0	0	0	0	0	0		0	0	0	0	0	0
115	Jersey	JE	Europe	0	0	0	0	0	0	0		#DIV/0!	#DIV/0!	#DIV/0!	#DIV/0!	#DIV/0!	#DIV/0!
116	Jordan	JO	Middle East and North Africa	36662.6	0	0	0	0	0	0		0	0	0	0	0	0
117	Juan De Nova Island	TF	other	0	0	0	0	0	0	0		#DIV/0!	#DIV/0!	#DIV/0!	#DIV/0!	#DIV/0!	#DIV/0!
118	Kazakhstan	KZ	West Asia	0	0	0	0	0	0	0		#DIV/0!	#DIV/0!	#DIV/0!	#DIV/0!	#DIV/0!	#DIV/0!
119	Kenya	KE	East Africa	1.19802e+06	0	0	0	0	0	0		0	0	0	0	0	0
120	Kiribati	KI	oceania	0	0	0	0	0	0	0		#DIV/0!	#DIV/0!	#DIV/0!	#DIV/0!	#DIV/0!	#DIV/0!
121	Kuwait	KW	Middle East and North Africa	0	0	0	0	0	0	0		#DIV/0!	#DIV/0!	#DIV/0!	#DIV/0!	#DIV/0!	#DIV/0!
122	Kyrgyzstan	KG	West Asia	0	0	0	0	0	0	0		#DIV/0!	#DIV/0!	#DIV/0!	#DIV/0!	#DIV/0!	#DIV/0!
123	Laos	LA	Southeast Asia	158149	42866.1	18110.1	0	44117.7	52927.7	0		0.271049	0.114513	0	0.278963	0.33467	0
124	Latvia	LV	Europe	0	0	0	0	0	0	0		#DIV/0!	#DIV/0!	#DIV/0!	#DIV/0!	#DIV/0!	#DIV/0!
125	Lebanon	LB	Middle East and North Africa	50679.7	0	0	0	0	0	0		0	0	0	0	0	0
126	Lesotho	LS	South Africa	80.4	0	0	0	0	0	0		0	0	0	0	0	0
127	Liberia	LR	West Africa	106328	0	0	0	0	0	0		0	0	0	0	0	0
128	Libya	LY	Middle East and North Africa	0	0	0	0	0	0	0		#DIV/0!	#DIV/0!	#DIV/0!	#DIV/0!	#DIV/0!	#DIV/0!
129	Liechtenstein	LI	Europe	0	0	0	0	0	0	0		#DIV/0!	#DIV/0!	#DIV/0!	#DIV/0!	#DIV/0!	#DIV/0!
130	Lithuania	LT	Europe	0	0	0	0	0	0	0		#DIV/0!	#DIV/0!	#DIV/0!	#DIV/0!	#DIV/0!	#DIV/0!
131	Luxembourg	LU	Europe	0	0	0	0	0	0	0		#DIV/0!	#DIV/0!	#DIV/0!	#DIV/0!	#DIV/0!	#DIV/0!
132	Madagascar	MG	East Africa	267985	1036.3	244740	0	0	169512	76264.4		0.00386701	0.913259	0	0	0.632541	0.284585
133	Madeira	PT	Europe	0	0	0	0	0	0	0		#DIV/0!	#DIV/0!	#DIV/0!	#DIV/0!	#DIV/0!	#DIV/0!
134	Malawi	MW	East Africa	365517	0	0	0	68.9	0	0		0	0	0	0.0001885	0	0
135	Malaysia	MY	Southeast Asia	268665	227.8	0	0	5183	0	0		0.000847896	0	0	0.0192917	0	0
136	Maldives	MV	South Asia	40.3328	0	0	0	0	0	0		0	0	0	0	0	0
137	Mali	ML	West Africa	45560.7	0	0	0	0	0	0		0	0	0	0	0	0
138	Malta	MT	europe	0	0	0	0	0	0	0		#DIV/0!	#DIV/0!	#DIV/0!	#DIV/0!	#DIV/0!	#DIV/0!
139	Marshall Islands	MH	oceania	0	0	0	0	0	0	0		#DIV/0!	#DIV/0!	#DIV/0!	#DIV/0!	#DIV/0!	#DIV/0!
140	Martinique	MQ	Caribbean	208737	0	0	157982	0	0	157982		0	0	0.756847	0	0	0.756847
141	Mauritania	MR	West Africa	0	0	0	0	0	0	0		#DIV/0!	#DIV/0!	#DIV/0!	#DIV/0!	#DIV/0!	#DIV/0!
142	Mauritius	MU	East Africa	7272.9	0	6584.6	0	0	0	6584.6		0	0.905361	0	0	0	0.905361
143	Mayotte	YT	East Africa	0	0	0	0	0	0	0		#DIV/0!	#DIV/0!	#DIV/0!	#DIV/0!	#DIV/0!	#DIV/0!
144	Mexico	MX	central america	1.91677e+06	183005	166931	0	473385	141525	88970.9		0.0954758	0.0870896	0	0.24697	0.0738349	0.0464171
145	Micronesia	FM	oceania	357.9	298.5	0	0	119.8	178.7	0		0.834032	0	0	0.33473	0.499301	0
146	Moldova	MD	Europe	0	0	0	0	0	0	0		#DIV/0!	#DIV/0!	#DIV/0!	#DIV/0!	#DIV/0!	#DIV/0!
147	Monaco	MC	Europe	0	0	0	0	0	0	0		#DIV/0!	#DIV/0!	#DIV/0!	#DIV/0!	#DIV/0!	#DIV/0!
148	Mongolia	MN	East Asia	0	0	0	0	0	0	0		#DIV/0!	#DIV/0!	#DIV/0!	#DIV/0!	#DIV/0!	#DIV/0!
149	Montenegro	ME	Europe	0	0	0	0	0	0	0		#DIV/0!	#DIV/0!	#DIV/0!	#DIV/0!	#DIV/0!	#DIV/0!
150	Montserrat	MS	Caribbean	138	0	0	138	0	0	138		0	0	1	0	0	1
151	Morocco	MA	Middle East and North Africa	187680	72873.7	114806	0	0	187680	0		0.388287	0.611713	0	0	1	0
152	Mozambique	MZ	East Africa	245445	101261	85091	0	88953.7	128842	0		0.412562	0.34668	0	0.362418	0.524931	0
153	Myanmar	MM	Southeast Asia	11612.7	676	0	0	2038.4	0	0		0.0582121	0	0	0.175532	0	0
154	Namibia	NA	South Africa	27302.8	0	0	0	0	0	0		0	0	0	0	0	0
155	Nauru	NR	oceania	0	0	0	0	0	0	0		#DIV/0!	#DIV/0!	#DIV/0!	#DIV/0!	#DIV/0!	#DIV/0!
156	Nepal	NP	south asia	65043.4	0	0	0	0	0	0		0	0	0	0	0	0
157	Netherlands	NL	Europe	0	0	0	0	0	0	0		#DIV/0!	#DIV/0!	#DIV/0!	#DIV/0!	#DIV/0!	#DIV/0!
158	New Caledonia	NC	oceania	688.2	0	619	0	0	0	619		0	0.899448	0	0	0	0.899448
159	New Zealand	NZ	oceania	0	0	0	0	0	0	0		#DIV/0!	#DIV/0!	#DIV/0!	#DIV/0!	#DIV/0!	#DIV/0!
160	Nicaragua	NI	central america	40000.2	27395.6	1048	0	0	0	0		0.684887	0.0261999	0	0	0	0
161	Niger	NE	West Africa	86.3	0	0	0	0	0	0		0	0	0	0	0	0
162	Nigeria	NG	West Africa	1610.6	0	0	0	0	0	0		0	0	0	0	0	0
163	Niue	NU	oceania	80	0	0	0	0	0	0		0	0	0	0	0	0
164	Norfolk Island	NF	other	0	0	0	0	0	0	0		#DIV/0!	#DIV/0!	#DIV/0!	#DIV/0!	#DIV/0!	#DIV/0!
165	North Korea	KP	East Asia	0	0	0	0	0	0	0		#DIV/0!	#DIV/0!	#DIV/0!	#DIV/0!	#DIV/0!	#DIV/0!
166	North Macedonia	MK	Europe	2.4	0	0	0	0	0	0		0	0	0	0	0	0
167	Northern Mariana Islands	MP	oceania	0	0	0	0	0	0	0		#DIV/0!	#DIV/0!	#DIV/0!	#DIV/0!	#DIV/0!	#DIV/0!
168	Norway	NO	Europe	0	0	0	0	0	0	0		#DIV/0!	#DIV/0!	#DIV/0!	#DIV/0!	#DIV/0!	#DIV/0!
169	Oman	OM	Middle East and North Africa	28080	1597.7	19765.8	0	3347.6	19765.8	0		0.0568981	0.70391	0	0.119217	0.70391	0
170	Pakistan	PK	South Asia	100170	26202.2	44536	0	29564.9	50413.7	0		0.261578	0.444605	0	0.295148	0.503282	0
171	Palau	PW	oceania	0	0	0	0	0	0	0		#DIV/0!	#DIV/0!	#DIV/0!	#DIV/0!	#DIV/0!	#DIV/0!
172	Palestinian Territory	PS	Middle East and North Africa	940	0	0	0	0	0	0		0	0	0	0	0	0
173	Panama	PA	central america	256733	0	0	0	63962.8	0	0		0	0	0	0.249142	0	0
174	Papua New Guinea	PG	oceania	830337	49901.9	52188.6	0	86005.2	75862.4	0		0.0600983	0.0628523	0	0.103579	0.0913634	0
175	Paraguay	PY	South America	57529.1	0	0	0	0	0	0		0	0	0	0	0	0
176	Peru	PE	South America	66380.2	0	0	0	0	0	0		0	0	0	0	0	0
177	Philippines	PH	Southeast Asia	7.83521e+06	936274	5.03724e+06	1.26447e+06	501789	5.32566e+06	1.41066e+06		0.119496	0.642898	0.161384	0.0640428	0.679709	0.180041
178	Pitcairn	PN	other	0	0	0	0	0	0	0		#DIV/0!	#DIV/0!	#DIV/0!	#DIV/0!	#DIV/0!	#DIV/0!
179	Poland	PL	Europe	0	0	0	0	0	0	0		#DIV/0!	#DIV/0!	#DIV/0!	#DIV/0!	#DIV/0!	#DIV/0!
180	Portugal	PT	Europe	18164.9	0	705.9	0	0	705.9	0		0	0.0388607	0	0	0.0388607	0
181	Puerto Rico	PR	Caribbean	45995.3	0	0	39681.8	0	0	39681.8		0	0	0.862736	0	0	0.862736
182	Qatar	QA	Middle East and North Africa	0	0	0	0	0	0	0		#DIV/0!	#DIV/0!	#DIV/0!	#DIV/0!	#DIV/0!	#DIV/0!
183	RÃ©union	RE	other	0	0	0	0	0	0	0		#DIV/0!	#DIV/0!	#DIV/0!	#DIV/0!	#DIV/0!	#DIV/0!
184	Romania	RO	europe	0	0	0	0	0	0	0		#DIV/0!	#DIV/0!	#DIV/0!	#DIV/0!	#DIV/0!	#DIV/0!
185	Russian Federation	RU	europe	0	0	0	0	0	0	0		#DIV/0!	#DIV/0!	#DIV/0!	#DIV/0!	#DIV/0!	#DIV/0!
186	Rwanda	RW	East Africa	2.2932e+06	0	0	0	0	0	0		0	0	0	0	0	0
187	Saba	BQ	Caribbean	0	0	0	0	0	0	0		#DIV/0!	#DIV/0!	#DIV/0!	#DIV/0!	#DIV/0!	#DIV/0!
188	Saint Barthelemy	BL	Caribbean	0	0	0	0	0	0	0		#DIV/0!	#DIV/0!	#DIV/0!	#DIV/0!	#DIV/0!	#DIV/0!
189	Saint Eustatius	BQ	Caribbean	0	0	0	0	0	0	0		#DIV/0!	#DIV/0!	#DIV/0!	#DIV/0!	#DIV/0!	#DIV/0!
190	Saint Helena	SH	other	0	0	0	0	0	0	0		#DIV/0!	#DIV/0!	#DIV/0!	#DIV/0!	#DIV/0!	#DIV/0!
191	Saint Kitts and Nevis	KN	Caribbean	0	0	0	0	0	0	0		#DIV/0!	#DIV/0!	#DIV/0!	#DIV/0!	#DIV/0!	#DIV/0!
192	Saint Lucia	LC	Caribbean	19704.2	0	0	16937.7	0	0	16937.7		0	0	0.859598	0	0	0.859598
193	Saint Martin	MF	Caribbean	0	0	0	0	0	0	0		#DIV/0!	#DIV/0!	#DIV/0!	#DIV/0!	#DIV/0!	#DIV/0!
194	Saint Pierre and Miquelon	PM	north america	0	0	0	0	0	0	0		#DIV/0!	#DIV/0!	#DIV/0!	#DIV/0!	#DIV/0!	#DIV/0!
195	Saint Vincent and the Grenadines	VC	Caribbean	37001.6	0	0	37001.6	0	0	37001.6		0	0	1	0	0	1
196	Samoa	WS	oceania	0	0	0	0	0	0	0		#DIV/0!	#DIV/0!	#DIV/0!	#DIV/0!	#DIV/0!	#DIV/0!
197	San Marino	SM	Europe	0	0	0	0	0	0	0		#DIV/0!	#DIV/0!	#DIV/0!	#DIV/0!	#DIV/0!	#DIV/0!
198	Sao Tome and Principe	ST	west africa	21101.9	0	0	0	0	0	0		0	0	0	0	0	0
199	Saudi Arabia	SA	Middle East and North Africa	0	0	0	0	0	0	0		#DIV/0!	#DIV/0!	#DIV/0!	#DIV/0!	#DIV/0!	#DIV/0!
200	Senegal	SN	West Africa	29992.3	0	0	0	0	0	0		0	0	0	0	0	0
201	Serbia	RS	Europe	0	0	0	0	0	0	0		#DIV/0!	#DIV/0!	#DIV/0!	#DIV/0!	#DIV/0!	#DIV/0!
202	Seychelles	SC	south asia	401	0	0	0	0	0	0		0	0	0	0	0	0
203	Sierra Leone	SL	West Africa	1422.5	0	0	0	0	0	0		0	0	0	0	0	0
204	Singapore	SG	Southeast Asia	0	0	0	0	0	0	0		#DIV/0!	#DIV/0!	#DIV/0!	#DIV/0!	#DIV/0!	#DIV/0!
205	Sint Maarten	SX	Caribbean	0	0	0	0	0	0	0		#DIV/0!	#DIV/0!	#DIV/0!	#DIV/0!	#DIV/0!	#DIV/0!
206	Slovakia	SK	Europe	0	0	0	0	0	0	0		#DIV/0!	#DIV/0!	#DIV/0!	#DIV/0!	#DIV/0!	#DIV/0!
207	Slovenia	SI	Europe	0	0	0	0	0	0	0		#DIV/0!	#DIV/0!	#DIV/0!	#DIV/0!	#DIV/0!	#DIV/0!
208	Solomon Islands	SB	oceania	197.7	0	0	0	0	0	0		0	0	0	0	0	0
209	Somalia	SO	East Africa	22114.1	0	0	0	0	0	0		0	0	0	0	0	0
210	South Africa	ZA	South Africa	296905	10096.6	0	0	27412.3	505.8	0		0.0340061	0	0	0.0923267	0.00170357	0
211	South Georgia and South Sandwich Islands	GS	other	0	0	0	0	0	0	0		#DIV/0!	#DIV/0!	#DIV/0!	#DIV/0!	#DIV/0!	#DIV/0!
212	South Korea	KR	East Asia	0	0	0	0	0	0	0		#DIV/0!	#DIV/0!	#DIV/0!	#DIV/0!	#DIV/0!	#DIV/0!
213	South Sudan	SS	East Africa	511344	0	0	0	0	0	0		0	0	0	0	0	0
214	Spain	ES	Europe	248926	3849.8	28887.6	0	497	32240.4	0		0.0154657	0.116049	0	0.00199658	0.129518	0
215	Sri Lanka	LK	south asia	0	0	0	0	0	0	0		#DIV/0!	#DIV/0!	#DIV/0!	#DIV/0!	#DIV/0!	#DIV/0!
216	Sudan	SD	Middle East and North Africa	1870.5	0	0	0	0	0	0		0	0	0	0	0	0
217	Suriname	SR	Caribbean	78910.4	0	0	0	0	0	0		0	0	0	0	0	0
218	Svalbard	SJ	Europe	0	0	0	0	0	0	0		#DIV/0!	#DIV/0!	#DIV/0!	#DIV/0!	#DIV/0!	#DIV/0!
219	Sweden	SE	Europe	0	0	0	0	0	0	0		#DIV/0!	#DIV/0!	#DIV/0!	#DIV/0!	#DIV/0!	#DIV/0!
220	Switzerland	CH	Europe	0	0	0	0	0	0	0		#DIV/0!	#DIV/0!	#DIV/0!	#DIV/0!	#DIV/0!	#DIV/0!
221	Syria	SY	Middle East and North Africa	167.9	0	0	0	0	0	0		0	0	0	0	0	0
222	Tajikistan	TJ	West Asia	0	0	0	0	0	0	0		#DIV/0!	#DIV/0!	#DIV/0!	#DIV/0!	#DIV/0!	#DIV/0!
223	Tanzania	TZ	east africa	2.72944e+06	379.2	0	0	1183.9	0	0		0.00013893	0	0	0.000433753	0	0
224	Thailand	TH	Southeast Asia	1.24567e+06	490036	0	0	461813	215122	0		0.393392	0	0	0.370736	0.172696	0
225	Timor-Leste	TL	Southeast Asia	553	163	0	0	163	0	0		0.294756	0	0	0.294756	0	0
226	Togo	TG	West Africa	18506.4	0	0	0	0	0	0		0	0	0	0	0	0
227	Tokelau	TK	oceania	0	0	0	0	0	0	0		#DIV/0!	#DIV/0!	#DIV/0!	#DIV/0!	#DIV/0!	#DIV/0!
228	Tonga	TO	oceania	34.1249	0	0	0	0	0	0		0	0	0	0	0	0
229	Trinidad and Tobago	TT	Caribbean	3156.9	0	1995.5	0	0	1995.5	0		0	0.632107	0	0	0.632107	0
230	Tunisia	TN	Middle East and North Africa	0	0	0	0	0	0	0		#DIV/0!	#DIV/0!	#DIV/0!	#DIV/0!	#DIV/0!	#DIV/0!
231	Turkiye	TR	West Asia	115865	0	0	0	0	0	0		0	0	0	0	0	0
232	Turkmenistan	TM	West Asia	70.1	0	0	0	0	0	0		0	0	0	0	0	0
233	Turks and Caicos Islands	TC	Caribbean	0	0	0	0	0	0	0		#DIV/0!	#DIV/0!	#DIV/0!	#DIV/0!	#DIV/0!	#DIV/0!
234	Tuvalu	TV	oceania	0	0	0	0	0	0	0		#DIV/0!	#DIV/0!	#DIV/0!	#DIV/0!	#DIV/0!	#DIV/0!
235	Uganda	UG	east africa	538001	0	0	0	0	0	0		0	0	0	0	0	0
236	Ukraine	UA	Europe	0	0	0	0	0	0	0		#DIV/0!	#DIV/0!	#DIV/0!	#DIV/0!	#DIV/0!	#DIV/0!
237	United Arab Emirates	AE	Middle East and North Africa	178.9	0	0	0	0	0	0		0	0	0	0	0	0
238	United Kingdom	GB	Europe	0	0	0	0	0	0	0		#DIV/0!	#DIV/0!	#DIV/0!	#DIV/0!	#DIV/0!	#DIV/0!
239	United States	US	north america	6609.5	0	0	5501.6	0	0	5501.6		0	0	0.832378	0	0	0.832378
240	United States Minor Outlying Islands	UM	other	0	0	0	0	0	0	0		#DIV/0!	#DIV/0!	#DIV/0!	#DIV/0!	#DIV/0!	#DIV/0!
241	Uruguay	UY	South America	0	0	0	0	0	0	0		#DIV/0!	#DIV/0!	#DIV/0!	#DIV/0!	#DIV/0!	#DIV/0!
242	US Virgin Islands	VI	Caribbean	0	0	0	0	0	0	0		#DIV/0!	#DIV/0!	#DIV/0!	#DIV/0!	#DIV/0!	#DIV/0!
243	Uzbekistan	UZ	west asia	0	0	0	0	0	0	0		#DIV/0!	#DIV/0!	#DIV/0!	#DIV/0!	#DIV/0!	#DIV/0!
244	Vanuatu	VU	oceania	10925.8	0	8848.7	0	0	0	8848.7		0	0.80989	0	0	0	0.80989
245	Vatican City	VA	Europe	0	0	0	0	0	0	0		#DIV/0!	#DIV/0!	#DIV/0!	#DIV/0!	#DIV/0!	#DIV/0!
246	Venezuela	VE	South America	356557	15785	122890	0	36903.9	126419	0		0.0442706	0.344657	0	0.103501	0.354556	0
247	Vietnam	VN	Southeast Asia	1.30723e+06	178532	1.02979e+06	0	49481.1	1.15802e+06	0		0.136573	0.787762	0	0.0378519	0.885858	0
248	Wallis and Futuna	WF	other	468.768	0	0	0	0	0	0		0	0	0	0	0	0
249	Yemen	YE	Middle East and North Africa	90666	2080	161.3	0	3076.6	1997.4	0		0.0229413	0.00177906	0	0.0339333	0.0220303	0
250	Zambia	ZM	East Africa	2211.9	0	0	0	0	0	0		0	0	0	0	0	0
251	Zimbabwe	ZW	East Africa	75643.5	12287.4	0	0	29584.3	0	0		0.162438	0	0	0.391102	0	0

## Sheet: RP200
FID	COUNTRY	ISO	region	total production	present_class1	present_class2	present_class3	future_class1	future_class2	future_class3		share_P1	share_P2	share_P3	share_F1	share_F2	share_F3
1	Afghanistan	AF	South Asia	4.6	0	0	0	0	0	0		0	0	0	0	0	0
2	Albania	AL	Europe	7.1	0	0	0	0	0	0		0	0	0	0	0	0
3	Algeria	DZ	Middle East and North Africa	200.2	0	0	0	0	0	0		0	0	0	0	0	0
4	American Samoa	AS	Oceania	0	0	0	0	0	0	0		#DIV/0!	#DIV/0!	#DIV/0!	#DIV/0!	#DIV/0!	#DIV/0!
5	Andorra	AD	Europe	9	0	0	0	0	0	0		0	0	0	0	0	0
6	Angola	AO	Central Africa	1.59868e+06	0	0	0	357088	0	0		0	0	0	0.223364	0	0
7	Anguilla	AI	Caribbean	0	0	0	0	0	0	0		#DIV/0!	#DIV/0!	#DIV/0!	#DIV/0!	#DIV/0!	#DIV/0!
9	Antigua and Barbuda	AG	Caribbean	145.1	0	0	144.2	0	0	144.2		0	0	0.993797	0	0	0.993797
10	Argentina	AR	South America	140500	0	0	0	0	0	0		0	0	0	0	0	0
11	Armenia	AM	West Asia	0	0	0	0	0	0	0		#DIV/0!	#DIV/0!	#DIV/0!	#DIV/0!	#DIV/0!	#DIV/0!
12	Aruba	AW	Caribbean	0	0	0	0	0	0	0		#DIV/0!	#DIV/0!	#DIV/0!	#DIV/0!	#DIV/0!	#DIV/0!
13	Australia	AU	Oceania	196539	536.4	137711	0	830.8	135648	2206.5		0.00272923	0.700677	0	0.00422714	0.690185	0.0112268
14	Austria	AT	Europe	0	0	0	0	0	0	0		#DIV/0!	#DIV/0!	#DIV/0!	#DIV/0!	#DIV/0!	#DIV/0!
15	Azerbaijan	AZ	West Asia	0	0	0	0	0	0	0		#DIV/0!	#DIV/0!	#DIV/0!	#DIV/0!	#DIV/0!	#DIV/0!
16	Azores	PT	Europe	0	0	0	0	0	0	0		#DIV/0!	#DIV/0!	#DIV/0!	#DIV/0!	#DIV/0!	#DIV/0!
17	Bahamas	BS	Caribbean	2624.7	0	0	654.7	0	0	654.7		0	0	0.249438	0	0	0.249438
18	Bahrain	BH	Middle East and North Africa	0	0	0	0	90.8322	0	0		#DIV/0!	#DIV/0!	#DIV/0!	#DIV/0!	#DIV/0!	#DIV/0!
19	Bangladesh	BD	South Asia	732221	9317.9	299197	265675	21314.4	552620	0		0.0127255	0.408615	0.362835	0.0291092	0.754717	0
20	Barbados	BB	Caribbean	721.5	0	0	547.2	0	0	547.2		0	0	0.75842	0	0	0.75842
21	Belarus	BY	Europe	0	0	0	0	0	0	0		#DIV/0!	#DIV/0!	#DIV/0!	#DIV/0!	#DIV/0!	#DIV/0!
22	Belgium	BE	Europe	0	0	0	0	0	0	0		#DIV/0!	#DIV/0!	#DIV/0!	#DIV/0!	#DIV/0!	#DIV/0!
23	Belize	BZ	Central America	72980.1	0	0	63334.3	0	0	63334.3		0	0	0.86783	0	0	0.86783
24	Benin	BJ	West Africa	13677.9	0	0	0	0	0	0		0	0	0	0	0	0
25	Bermuda	BM	Caribbean	4.88558	0	0	5.11578	0	0	5.11578		0	0	1.04712	0	0	1.04712
26	Bhutan	BT	South Asia	562	0	0	0	0	0	0		0	0	0	0	0	0
27	Bolivia	BO	South America	127210	0	0	0	0	0	0		0	0	0	0	0	0
28	Bonaire	BQ	Caribbean	0	0	0	0	0	0	0		#DIV/0!	#DIV/0!	#DIV/0!	#DIV/0!	#DIV/0!	#DIV/0!
29	Bosnia and Herzegovina	BA	Europe	0	0	0	0	0	0	0		#DIV/0!	#DIV/0!	#DIV/0!	#DIV/0!	#DIV/0!	#DIV/0!
30	Botswana	BW	South Africa	81.5	0	0	0	0	0	0		0	0	0	0	0	0
31	Bouvet Island	BV	Europe	0	0	0	0	0	0	0		#DIV/0!	#DIV/0!	#DIV/0!	#DIV/0!	#DIV/0!	#DIV/0!
32	Brazil	BR	South America	5.60069e+06	0	0	0	0	0	0		0	0	0	0	0	0
33	British Indian Ocean Territory	IO	South Asia	0	0	0	0	0	0	0		#DIV/0!	#DIV/0!	#DIV/0!	#DIV/0!	#DIV/0!	#DIV/0!
34	British Virgin Islands	VG	Caribbean	16.5498	0	0	17.3408	0	0	17.3408		0	0	1.04779	0	0	1.04779
35	Brunei Darussalam	BN	Southeast Asia	726.1	0	0	0	23.5	0	0		0	0	0	0.0323647	0	0
36	Bulgaria	BG	Europe	23.7	0	0	0	0	0	0		0	0	0	0	0	0
37	Burkina Faso	BF	West Africa	0	0	0	0	0	0	0		#DIV/0!	#DIV/0!	#DIV/0!	#DIV/0!	#DIV/0!	#DIV/0!
38	Burundi	BI	East Africa	1.929e+06	0	0	0	0	0	0		0	0	0	0	0	0
39	Cabo Verde	CV	West Africa	4994.9	0	3459.9	0	0	3459.9	0		0	0.692687	0	0	0.692687	0
40	Cambodia	KH	Southeast Asia	154204	47638.2	95587.9	0	23753	119473	0		0.30893	0.61988	0	0.154036	0.774773	0
41	Cameroon	CM	West Africa	1.15725e+06	0	0	0	0	0	0		0	0	0	0	0	0
42	Canada	CA	north america	0	0	0	0	0	0	0		#DIV/0!	#DIV/0!	#DIV/0!	#DIV/0!	#DIV/0!	#DIV/0!
43	Canarias	ES	europe	347.9	0	307.2	0	0	307.2	0		0	0.883012	0	0	0.883012	0
44	Cayman Islands	KY	Caribbean	173.6	0	0	173.6	0	0	173.6		0	0	1	0	0	1
45	Central African Republic	CF	central africa	115497	0	0	0	0	0	0		0	0	0	0	0	0
46	Chad	TD	west africa	105.4	0	0	0	0	0	0		0	0	0	0	0	0
47	Chile	CL	South America	0	0	0	0	0	0	0		#DIV/0!	#DIV/0!	#DIV/0!	#DIV/0!	#DIV/0!	#DIV/0!
48	China	CN	East Asia	7.46644e+06	861706	5.63454e+06	244990	764600	4.85147e+06	1.22812e+06		0.11541	0.754649	0.0328122	0.102405	0.64977	0.164485
49	Christmas Island	CX	oceania	0	0	0	0	0	0	0		#DIV/0!	#DIV/0!	#DIV/0!	#DIV/0!	#DIV/0!	#DIV/0!
50	Cocos Islands	CC	oceania	0	0	0	0	0	0	0		#DIV/0!	#DIV/0!	#DIV/0!	#DIV/0!	#DIV/0!	#DIV/0!
51	Colombia	CO	South America	1.66682e+06	235817	111745	0	218039	129522	0		0.141477	0.0670407	0	0.130811	0.0777062	0
52	Comoros	KM	East Africa	0	0	0	0	0	0	0		#DIV/0!	#DIV/0!	#DIV/0!	#DIV/0!	#DIV/0!	#DIV/0!
53	Congo	CG	Central Africa	73216.1	0	0	0	0	0	0		0	0	0	0	0	0
54	Congo DRC	CD	Central Africa	286948	0	0	0	0	0	0		0	0	0	0	0	0
55	Cook Islands	CK	Oceania	0	0	0	0	0	0	0		#DIV/0!	#DIV/0!	#DIV/0!	#DIV/0!	#DIV/0!	#DIV/0!
56	Costa Rica	CR	Central America	1.857e+06	1.29427e+06	393979	0	155204	1.51236e+06	0		0.69697	0.212159	0	0.0835777	0.814414	0
57	CÃ´te d'Ivoire	CI	West Africa	232461	0	0	0	0	0	0		0	0	0	0	0	0
58	Croatia	HR	Europe	0	0	0	0	0	0	0		#DIV/0!	#DIV/0!	#DIV/0!	#DIV/0!	#DIV/0!	#DIV/0!
59	Cuba	CU	Caribbean	186473	0	0	176076	0	0	176076		0	0	0.944243	0	0	0.944243
60	Curacao	CW	Caribbean	0	0	0	0	0	0	0		#DIV/0!	#DIV/0!	#DIV/0!	#DIV/0!	#DIV/0!	#DIV/0!
61	Cyprus	CY	Europe	3930	0	0	0	0	0	0		0	0	0	0	0	0
62	Czech Republic	CZ	Europe	0	0	0	0	0	0	0		#DIV/0!	#DIV/0!	#DIV/0!	#DIV/0!	#DIV/0!	#DIV/0!
63	Denmark	DK	Europe	0	0	0	0	0	0	0		#DIV/0!	#DIV/0!	#DIV/0!	#DIV/0!	#DIV/0!	#DIV/0!
64	Djibouti	DJ	East Africa	0	0	0	0	0	0	0		#DIV/0!	#DIV/0!	#DIV/0!	#DIV/0!	#DIV/0!	#DIV/0!
65	Dominica	DM	Caribbean	15155.3	0	0	12338.3	0	0	12338.3		0	0	0.814124	0	0	0.814124
66	Dominican Republic	DO	Caribbean	526289	0	0	511360	0	0	511360		0	0	0.971632	0	0	0.971632
67	Ecuador	EC	South America	6.49479e+06	0	0	0	0	0	0		0	0	0	0	0	0
68	Egypt	EG	Middle East and North Africa	816260	0	0	0	0	0	0		0	0	0	0	0	0
69	El Salvador	SV	Central America	0	1547.46	0	0	0	0	0		#DIV/0!	#DIV/0!	#DIV/0!	#DIV/0!	#DIV/0!	#DIV/0!
70	Equatorial Guinea	GQ	central africa	32549.5	0	0	0	0	0	0		0	0	0	0	0	0
71	Eritrea	ER	East Africa	0.9	0	0	0	0	0	0		0	0	0	0	0	0
72	Estonia	EE	Europe	0	0	0	0	0	0	0		#DIV/0!	#DIV/0!	#DIV/0!	#DIV/0!	#DIV/0!	#DIV/0!
73	Eswatini	SZ	South Africa	4787.6	4050.4	0	0	3879.4	171	0		0.846019	0	0	0.810302	0.0357173	0
74	Ethiopia	ET	East Africa	233962	0	0	0	0	0	0		0	0	0	0	0	0
75	Falkland Islands	FK	South America	0	0	0	0	0	0	0		#DIV/0!	#DIV/0!	#DIV/0!	#DIV/0!	#DIV/0!	#DIV/0!
76	Faroe Islands	FO	Europe	0	0	0	0	0	0	0		#DIV/0!	#DIV/0!	#DIV/0!	#DIV/0!	#DIV/0!	#DIV/0!
77	Fiji	FJ	oceania	3013.6	0	0	0	0	0	0		0	0	0	0	0	0
78	Finland	FI	Europe	0	0	0	0	0	0	0		#DIV/0!	#DIV/0!	#DIV/0!	#DIV/0!	#DIV/0!	#DIV/0!
79	France	FR	Europe	9	0	0	0	0	0	0		0	0	0	0	0	0
80	French Guiana	GF	South America	6515.6	0	0	0	1430.1	0	0		0	0	0	0.219489	0	0
81	French Polynesia	PF	oceania	34.1	0	0	0	0	0	0		0	0	0	0	0	0
82	French Southern Territories	TF	other	0	0	0	0	0	0	0		#DIV/0!	#DIV/0!	#DIV/0!	#DIV/0!	#DIV/0!	#DIV/0!
83	Gabon	GA	Central Africa	13455.4	0	0	0	0	0	0		0	0	0	0	0	0
84	Gambia	GM	West Africa	228.5	0	0	0	299.928	0	0		0	0	0	1.3126	0	0
85	Georgia	GE	West Asia	0	0	0	0	0	0	0		#DIV/0!	#DIV/0!	#DIV/0!	#DIV/0!	#DIV/0!	#DIV/0!
86	Germany	DE	Europe	0	0	0	0	0	0	0		#DIV/0!	#DIV/0!	#DIV/0!	#DIV/0!	#DIV/0!	#DIV/0!
87	Ghana	GH	West Africa	60946	0	0	0	0	0	0		0	0	0	0	0	0
88	Gibraltar	GI	europe	0.203088	0	0	0	0	0	0		0	0	0	0	0	0
89	Glorioso Islands	TF	other	0	0	0	0	0	0	0		#DIV/0!	#DIV/0!	#DIV/0!	#DIV/0!	#DIV/0!	#DIV/0!
90	Greece	GR	europe	2149.5	0	0	0	0	0	0		0	0	0	0	0	0
91	Greenland	GL	europe	0	0	0	0	0	0	0		#DIV/0!	#DIV/0!	#DIV/0!	#DIV/0!	#DIV/0!	#DIV/0!
92	Grenada	GD	Caribbean	313.6	0	0	313.6	0	0	313.6		0	0	1	0	0	1
93	Guadeloupe	GP	Caribbean	39222.5	0	0	32638.7	0	0	32638.7		0	0	0.832142	0	0	0.832142
94	Guam	GU	oceania	287.1	0	0	0	0	0	0		0	0	0	0	0	0
95	Guatemala	GT	Central America	1.97851e+06	1.43185e+06	318156	0	0	300325	0		0.723699	0.160805	0	0	0.151793	0
96	Guernsey	GG	Europe	0	0	0	0	0	0	0		#DIV/0!	#DIV/0!	#DIV/0!	#DIV/0!	#DIV/0!	#DIV/0!
97	Guinea	GN	West Africa	198890	0	0	0	25868.1	0	0		0	0	0	0.130062	0	0
98	Guinea-Bissau	GW	West Africa	4726.1	0	0	0	379.7	0	0		0	0	0	0.0803411	0	0
99	Guyana	GY	South America	4906.5	534.3	0	0	1660.3	196.1	0		0.108896	0	0	0.338388	0.0399674	0
100	Haiti	HT	Caribbean	270074	0	0	264825	0	0	264825		0	0	0.980565	0	0	0.980565
101	Heard Island and McDonald Islands	HM	other	0	0	0	0	0	0	0		#DIV/0!	#DIV/0!	#DIV/0!	#DIV/0!	#DIV/0!	#DIV/0!
102	Honduras	HN	Central America	637787	3357.6	543423	2832.7	0	291032	2632.6		0.00526445	0.852045	0.00444145	0	0.456316	0.00412771
103	Hungary	HU	Europe	0	0	0	0	0	0	0		#DIV/0!	#DIV/0!	#DIV/0!	#DIV/0!	#DIV/0!	#DIV/0!
104	Iceland	IS	Europe	0	0	0	0	0	0	0		#DIV/0!	#DIV/0!	#DIV/0!	#DIV/0!	#DIV/0!	#DIV/0!
105	India	IN	South Asia	2.24733e+07	3.87101e+06	1.34264e+07	1.10584e+06	4.32075e+06	1.40619e+07	64914		0.17225	0.597437	0.0492067	0.192261	0.625718	0.0028885
106	Indonesia	ID	Southeast Asia	4.97488e+06	599553	60118.7	0	2.61211e+06	95891.9	0		0.120516	0.0120845	0	0.525061	0.0192752	0
107	Iran	IR	Middle East and North Africa	73820.8	370.1	188.6	0	370.1	188.6	0		0.00501349	0.00255484	0	0.00501349	0.00255484	0
108	Iraq	IQ	Middle East and North Africa	381.1	0	0	0	0	0	0		0	0	0	0	0	0
109	Ireland	IE	Europe	0	0	0	0	0	0	0		#DIV/0!	#DIV/0!	#DIV/0!	#DIV/0!	#DIV/0!	#DIV/0!
110	Isle of Man	IM	Europe	0	0	0	0	0	0	0		#DIV/0!	#DIV/0!	#DIV/0!	#DIV/0!	#DIV/0!	#DIV/0!
111	Israel	IL	Middle East and North Africa	62937.6	0	0	0	0	0	0		0	0	0	0	0	0
112	Italy	IT	Europe	224.1	0	0	0	0	0	0		0	0	0	0	0	0
113	Jamaica	JM	Caribbean	36808.9	0	0	36633.7	0	0	36633.7		0	0	0.99524	0	0	0.99524
114	Japan	JP	East Asia	36.2	0	0	0	0	0	0		0	0	0	0	0	0
115	Jersey	JE	Europe	0	0	0	0	0	0	0		#DIV/0!	#DIV/0!	#DIV/0!	#DIV/0!	#DIV/0!	#DIV/0!
116	Jordan	JO	Middle East and North Africa	36662.6	0	0	0	0	0	0		0	0	0	0	0	0
117	Juan De Nova Island	TF	other	0	0	0	0	0	0	0		#DIV/0!	#DIV/0!	#DIV/0!	#DIV/0!	#DIV/0!	#DIV/0!
118	Kazakhstan	KZ	West Asia	0	0	0	0	0	0	0		#DIV/0!	#DIV/0!	#DIV/0!	#DIV/0!	#DIV/0!	#DIV/0!
119	Kenya	KE	East Africa	1.19802e+06	0	0	0	0	0	0		0	0	0	0	0	0
120	Kiribati	KI	oceania	0	0	0	0	0	0	0		#DIV/0!	#DIV/0!	#DIV/0!	#DIV/0!	#DIV/0!	#DIV/0!
121	Kuwait	KW	Middle East and North Africa	0	0	0	0	0	0	0		#DIV/0!	#DIV/0!	#DIV/0!	#DIV/0!	#DIV/0!	#DIV/0!
122	Kyrgyzstan	KG	West Asia	0	0	0	0	0	0	0		#DIV/0!	#DIV/0!	#DIV/0!	#DIV/0!	#DIV/0!	#DIV/0!
123	Laos	LA	Southeast Asia	158149	32493	41033.5	0	57907.2	58275.4	0		0.205459	0.259462	0	0.366157	0.368485	0
124	Latvia	LV	Europe	0	0	0	0	0	0	0		#DIV/0!	#DIV/0!	#DIV/0!	#DIV/0!	#DIV/0!	#DIV/0!
125	Lebanon	LB	Middle East and North Africa	50679.7	0	0	0	0	0	0		0	0	0	0	0	0
126	Lesotho	LS	South Africa	80.4	0	0	0	0	0	0		0	0	0	0	0	0
127	Liberia	LR	West Africa	106328	0	0	0	0	0	0		0	0	0	0	0	0
128	Libya	LY	Middle East and North Africa	0	0	0	0	0	0	0		#DIV/0!	#DIV/0!	#DIV/0!	#DIV/0!	#DIV/0!	#DIV/0!
129	Liechtenstein	LI	Europe	0	0	0	0	0	0	0		#DIV/0!	#DIV/0!	#DIV/0!	#DIV/0!	#DIV/0!	#DIV/0!
130	Lithuania	LT	Europe	0	0	0	0	0	0	0		#DIV/0!	#DIV/0!	#DIV/0!	#DIV/0!	#DIV/0!	#DIV/0!
131	Luxembourg	LU	Europe	0	0	0	0	0	0	0		#DIV/0!	#DIV/0!	#DIV/0!	#DIV/0!	#DIV/0!	#DIV/0!
132	Madagascar	MG	East Africa	267985	70.2	197244	48461.8	0	96475.2	149301		0.000261955	0.736026	0.180838	0	0.360002	0.557124
133	Madeira	PT	Europe	0	0	0	0	0	0	0		#DIV/0!	#DIV/0!	#DIV/0!	#DIV/0!	#DIV/0!	#DIV/0!
134	Malawi	MW	East Africa	365517	68.9	0	0	881.7	0	0		0.0001885	0	0	0.0024122	0	0
135	Malaysia	MY	Southeast Asia	268665	2630.5	0	0	23064.4	0	0		0.009791	0	0	0.0858481	0	0
136	Maldives	MV	South Asia	40.3328	0	0	0	0	0	0		0	0	0	0	0	0
137	Mali	ML	West Africa	45560.7	0	0	0	0	0	0		0	0	0	0	0	0
138	Malta	MT	europe	0	0	0	0	0	0	0		#DIV/0!	#DIV/0!	#DIV/0!	#DIV/0!	#DIV/0!	#DIV/0!
139	Marshall Islands	MH	oceania	0	0	0	0	0	0	0		#DIV/0!	#DIV/0!	#DIV/0!	#DIV/0!	#DIV/0!	#DIV/0!
140	Martinique	MQ	Caribbean	208737	0	0	157982	0	0	157982		0	0	0.756847	0	0	0.756847
141	Mauritania	MR	West Africa	0	0	0	0	0	0	0		#DIV/0!	#DIV/0!	#DIV/0!	#DIV/0!	#DIV/0!	#DIV/0!
142	Mauritius	MU	East Africa	7272.9	0	3036.4	3548.2	0	0	6584.6		0	0.417495	0.487866	0	0	0.905361
143	Mayotte	YT	East Africa	0	0	0	0	0	0	0		#DIV/0!	#DIV/0!	#DIV/0!	#DIV/0!	#DIV/0!	#DIV/0!
144	Mexico	MX	central america	1.91677e+06	1.0044e+06	171676	83443.4	474508	157112	98006.9		0.524007	0.0895651	0.0435333	0.247556	0.0819672	0.0511312
145	Micronesia	FM	oceania	357.9	119.8	178.7	0	119.8	178.7	0		0.33473	0.499301	0	0.33473	0.499301	0
146	Moldova	MD	Europe	0	0	0	0	0	0	0		#DIV/0!	#DIV/0!	#DIV/0!	#DIV/0!	#DIV/0!	#DIV/0!
147	Monaco	MC	Europe	0	0	0	0	0	0	0		#DIV/0!	#DIV/0!	#DIV/0!	#DIV/0!	#DIV/0!	#DIV/0!
148	Mongolia	MN	East Asia	0	0	0	0	0	0	0		#DIV/0!	#DIV/0!	#DIV/0!	#DIV/0!	#DIV/0!	#DIV/0!
149	Montenegro	ME	Europe	0	0	0	0	0	0	0		#DIV/0!	#DIV/0!	#DIV/0!	#DIV/0!	#DIV/0!	#DIV/0!
150	Montserrat	MS	Caribbean	138	0	0	138	0	0	138		0	0	1	0	0	1
151	Morocco	MA	Middle East and North Africa	187680	0	187680	0	0	187680	0		0	1	0	0	1	0
152	Mozambique	MZ	East Africa	245445	78351.8	132509	0	64312.8	161296	0		0.319223	0.53987	0	0.262025	0.657157	0
153	Myanmar	MM	Southeast Asia	11612.7	1002.5	676	0	3412.2	0	0		0.0863279	0.0582121	0	0.293833	0	0
154	Namibia	NA	South Africa	27302.8	0	0	0	0	0	0		0	0	0	0	0	0
155	Nauru	NR	oceania	0	0	0	0	0	0	0		#DIV/0!	#DIV/0!	#DIV/0!	#DIV/0!	#DIV/0!	#DIV/0!
156	Nepal	NP	south asia	65043.4	0	0	0	0	0	0		0	0	0	0	0	0
157	Netherlands	NL	Europe	0	0	0	0	0	0	0		#DIV/0!	#DIV/0!	#DIV/0!	#DIV/0!	#DIV/0!	#DIV/0!
158	New Caledonia	NC	oceania	688.2	0	619	0	0	0	619		0	0.899448	0	0	0	0.899448
159	New Zealand	NZ	oceania	0	0	0	0	0	0	0		#DIV/0!	#DIV/0!	#DIV/0!	#DIV/0!	#DIV/0!	#DIV/0!
160	Nicaragua	NI	central america	40000.2	0	28443.6	0	0	0	0		0	0.711086	0	0	0	0
161	Niger	NE	West Africa	86.3	0	0	0	0	0	0		0	0	0	0	0	0
162	Nigeria	NG	West Africa	1610.6	0	0	0	0	0	0		0	0	0	0	0	0
163	Niue	NU	oceania	80	0	0	0	0	0	0		0	0	0	0	0	0
164	Norfolk Island	NF	other	0	0	0	0	0	0	0		#DIV/0!	#DIV/0!	#DIV/0!	#DIV/0!	#DIV/0!	#DIV/0!
165	North Korea	KP	East Asia	0	0	0	0	0	0	0		#DIV/0!	#DIV/0!	#DIV/0!	#DIV/0!	#DIV/0!	#DIV/0!
166	North Macedonia	MK	Europe	2.4	0	0	0	0	0	0		0	0	0	0	0	0
167	Northern Mariana Islands	MP	oceania	0	0	0	0	0	0	0		#DIV/0!	#DIV/0!	#DIV/0!	#DIV/0!	#DIV/0!	#DIV/0!
168	Norway	NO	Europe	0	0	0	0	0	0	0		#DIV/0!	#DIV/0!	#DIV/0!	#DIV/0!	#DIV/0!	#DIV/0!
169	Oman	OM	Middle East and North Africa	28080	2838.5	20168.5	0	3323.3	20624.2	58.3		0.101086	0.718251	0	0.118351	0.73448	0.00207621
170	Pakistan	PK	South Asia	100170	17543.8	60914	0	17859.5	63941.2	34.7		0.17514	0.608107	0	0.178292	0.638327	0.000346411
171	Palau	PW	oceania	0	0	0	0	0	0	0		#DIV/0!	#DIV/0!	#DIV/0!	#DIV/0!	#DIV/0!	#DIV/0!
172	Palestinian Territory	PS	Middle East and North Africa	940	0	0	0	0	0	0		0	0	0	0	0	0
173	Panama	PA	central america	256733	54168.8	0	0	112603	0	0		0.210993	0	0	0.4386	0	0
174	Papua New Guinea	PG	oceania	830337	64900.7	86626.5	0	105602	101635	772.2		0.0781619	0.104327	0	0.12718	0.122402	0.000929984
175	Paraguay	PY	South America	57529.1	0	0	0	0	0	0		0	0	0	0	0	0
176	Peru	PE	South America	66380.2	0	0	0	0	0	0		0	0	0	0	0	0
177	Philippines	PH	Southeast Asia	7.83521e+06	462618	5.33697e+06	1.4384e+06	71314	5.68559e+06	1.48126e+06		0.0590435	0.681153	0.183582	0.00910174	0.725646	0.189052
178	Pitcairn	PN	other	0	0	0	0	0	0	0		#DIV/0!	#DIV/0!	#DIV/0!	#DIV/0!	#DIV/0!	#DIV/0!
179	Poland	PL	Europe	0	0	0	0	0	0	0		#DIV/0!	#DIV/0!	#DIV/0!	#DIV/0!	#DIV/0!	#DIV/0!
180	Portugal	PT	Europe	18164.9	0	705.9	0	0	705.9	0		0	0.0388607	0	0	0.0388607	0
181	Puerto Rico	PR	Caribbean	45995.3	0	0	39681.8	0	0	39681.8		0	0	0.862736	0	0	0.862736
182	Qatar	QA	Middle East and North Africa	0	0	0	0	0	0	0		#DIV/0!	#DIV/0!	#DIV/0!	#DIV/0!	#DIV/0!	#DIV/0!
183	RÃ©union	RE	other	0	0	0	0	0	0	0		#DIV/0!	#DIV/0!	#DIV/0!	#DIV/0!	#DIV/0!	#DIV/0!
184	Romania	RO	europe	0	0	0	0	0	0	0		#DIV/0!	#DIV/0!	#DIV/0!	#DIV/0!	#DIV/0!	#DIV/0!
185	Russian Federation	RU	europe	0	0	0	0	0	0	0		#DIV/0!	#DIV/0!	#DIV/0!	#DIV/0!	#DIV/0!	#DIV/0!
186	Rwanda	RW	East Africa	2.2932e+06	0	0	0	0	0	0		0	0	0	0	0	0
187	Saba	BQ	Caribbean	0	0	0	0	0	0	0		#DIV/0!	#DIV/0!	#DIV/0!	#DIV/0!	#DIV/0!	#DIV/0!
188	Saint Barthelemy	BL	Caribbean	0	0	0	0	0	0	0		#DIV/0!	#DIV/0!	#DIV/0!	#DIV/0!	#DIV/0!	#DIV/0!
189	Saint Eustatius	BQ	Caribbean	0	0	0	0	0	0	0		#DIV/0!	#DIV/0!	#DIV/0!	#DIV/0!	#DIV/0!	#DIV/0!
190	Saint Helena	SH	other	0	0	0	0	0	0	0		#DIV/0!	#DIV/0!	#DIV/0!	#DIV/0!	#DIV/0!	#DIV/0!
191	Saint Kitts and Nevis	KN	Caribbean	0	0	0	0	0	0	0		#DIV/0!	#DIV/0!	#DIV/0!	#DIV/0!	#DIV/0!	#DIV/0!
192	Saint Lucia	LC	Caribbean	19704.2	0	0	16937.7	0	0	16937.7		0	0	0.859598	0	0	0.859598
193	Saint Martin	MF	Caribbean	0	0	0	0	0	0	0		#DIV/0!	#DIV/0!	#DIV/0!	#DIV/0!	#DIV/0!	#DIV/0!
194	Saint Pierre and Miquelon	PM	north america	0	0	0	0	0	0	0		#DIV/0!	#DIV/0!	#DIV/0!	#DIV/0!	#DIV/0!	#DIV/0!
195	Saint Vincent and the Grenadines	VC	Caribbean	37001.6	0	0	37001.6	0	0	37001.6		0	0	1	0	0	1
196	Samoa	WS	oceania	0	0	0	0	0	0	0		#DIV/0!	#DIV/0!	#DIV/0!	#DIV/0!	#DIV/0!	#DIV/0!
197	San Marino	SM	Europe	0	0	0	0	0	0	0		#DIV/0!	#DIV/0!	#DIV/0!	#DIV/0!	#DIV/0!	#DIV/0!
198	Sao Tome and Principe	ST	west africa	21101.9	0	0	0	0	0	0		0	0	0	0	0	0
199	Saudi Arabia	SA	Middle East and North Africa	0	0	0	0	0	0	0		#DIV/0!	#DIV/0!	#DIV/0!	#DIV/0!	#DIV/0!	#DIV/0!
200	Senegal	SN	West Africa	29992.3	0	0	0	6387.6	0	0		0	0	0	0.212975	0	0
201	Serbia	RS	Europe	0	0	0	0	0	0	0		#DIV/0!	#DIV/0!	#DIV/0!	#DIV/0!	#DIV/0!	#DIV/0!
202	Seychelles	SC	south asia	401	0	0	0	0	0	0		0	0	0	0	0	0
203	Sierra Leone	SL	West Africa	1422.5	0	0	0	0	0	0		0	0	0	0	0	0
204	Singapore	SG	Southeast Asia	0	0	0	0	0	0	0		#DIV/0!	#DIV/0!	#DIV/0!	#DIV/0!	#DIV/0!	#DIV/0!
205	Sint Maarten	SX	Caribbean	0	0	0	0	0	0	0		#DIV/0!	#DIV/0!	#DIV/0!	#DIV/0!	#DIV/0!	#DIV/0!
206	Slovakia	SK	Europe	0	0	0	0	0	0	0		#DIV/0!	#DIV/0!	#DIV/0!	#DIV/0!	#DIV/0!	#DIV/0!
207	Slovenia	SI	Europe	0	0	0	0	0	0	0		#DIV/0!	#DIV/0!	#DIV/0!	#DIV/0!	#DIV/0!	#DIV/0!
208	Solomon Islands	SB	oceania	197.7	0	0	0	0	0	0		0	0	0	0	0	0
209	Somalia	SO	East Africa	22114.1	0	0	0	0	0	0		0	0	0	0	0	0
210	South Africa	ZA	South Africa	296905	11977.3	2860.4	0	40703.8	9859	0		0.0403405	0.00963404	0	0.137093	0.0332059	0
211	South Georgia and South Sandwich Islands	GS	other	0	0	0	0	0	0	0		#DIV/0!	#DIV/0!	#DIV/0!	#DIV/0!	#DIV/0!	#DIV/0!
212	South Korea	KR	East Asia	0	0	0	0	0	0	0		#DIV/0!	#DIV/0!	#DIV/0!	#DIV/0!	#DIV/0!	#DIV/0!
213	South Sudan	SS	East Africa	511344	0	0	0	0	0	0		0	0	0	0	0	0
214	Spain	ES	Europe	248926	497	32240.4	0	0	32737.4	0		0.00199658	0.129518	0	0	0.131515	0
215	Sri Lanka	LK	south asia	0	0	0	0	0	0	0		#DIV/0!	#DIV/0!	#DIV/0!	#DIV/0!	#DIV/0!	#DIV/0!
216	Sudan	SD	Middle East and North Africa	1870.5	0	0	0	0	0	0		0	0	0	0	0	0
217	Suriname	SR	Caribbean	78910.4	0	0	0	70910.8	0	0		0	0	0	0.898624	0	0
218	Svalbard	SJ	Europe	0	0	0	0	0	0	0		#DIV/0!	#DIV/0!	#DIV/0!	#DIV/0!	#DIV/0!	#DIV/0!
219	Sweden	SE	Europe	0	0	0	0	0	0	0		#DIV/0!	#DIV/0!	#DIV/0!	#DIV/0!	#DIV/0!	#DIV/0!
220	Switzerland	CH	Europe	0	0	0	0	0	0	0		#DIV/0!	#DIV/0!	#DIV/0!	#DIV/0!	#DIV/0!	#DIV/0!
221	Syria	SY	Middle East and North Africa	167.9	0	0	0	0	0	0		0	0	0	0	0	0
222	Tajikistan	TJ	West Asia	0	0	0	0	0	0	0		#DIV/0!	#DIV/0!	#DIV/0!	#DIV/0!	#DIV/0!	#DIV/0!
223	Tanzania	TZ	east africa	2.72944e+06	1183.9	0	0	3691.8	1165.1	0		0.000433753	0	0	0.00135259	0.000426865	0
224	Thailand	TH	Southeast Asia	1.24567e+06	589311	42252	0	471644	413529	0		0.473089	0.0339192	0	0.378628	0.331974	0
225	Timor-Leste	TL	Southeast Asia	553	163	0	0	0	163	0		0.294756	0	0	0	0.294756	0
226	Togo	TG	West Africa	18506.4	0	0	0	0	0	0		0	0	0	0	0	0
227	Tokelau	TK	oceania	0	0	0	0	0	0	0		#DIV/0!	#DIV/0!	#DIV/0!	#DIV/0!	#DIV/0!	#DIV/0!
228	Tonga	TO	oceania	34.1249	0	0	0	0	0	0		0	0	0	0	0	0
229	Trinidad and Tobago	TT	Caribbean	3156.9	0	578	1417.5	0	262.4	1733.1		0	0.183091	0.449016	0	0.0831195	0.548988
230	Tunisia	TN	Middle East and North Africa	0	0	0	0	0	0	0		#DIV/0!	#DIV/0!	#DIV/0!	#DIV/0!	#DIV/0!	#DIV/0!
231	Turkiye	TR	West Asia	115865	0	0	0	0	0	0		0	0	0	0	0	0
232	Turkmenistan	TM	West Asia	70.1	0	0	0	0	0	0		0	0	0	0	0	0
233	Turks and Caicos Islands	TC	Caribbean	0	0	0	0	0	0	0		#DIV/0!	#DIV/0!	#DIV/0!	#DIV/0!	#DIV/0!	#DIV/0!
234	Tuvalu	TV	oceania	0	0	0	0	0	0	0		#DIV/0!	#DIV/0!	#DIV/0!	#DIV/0!	#DIV/0!	#DIV/0!
235	Uganda	UG	east africa	538001	0	0	0	0	0	0		0	0	0	0	0	0
236	Ukraine	UA	Europe	0	0	0	0	0	0	0		#DIV/0!	#DIV/0!	#DIV/0!	#DIV/0!	#DIV/0!	#DIV/0!
237	United Arab Emirates	AE	Middle East and North Africa	178.9	0	0	0	26.1089	0	0		0	0	0	0.145941	0	0
238	United Kingdom	GB	Europe	0	0	0	0	0	0	0		#DIV/0!	#DIV/0!	#DIV/0!	#DIV/0!	#DIV/0!	#DIV/0!
239	United States	US	north america	6609.5	0	0	5501.6	0	0	5501.6		0	0	0.832378	0	0	0.832378
240	United States Minor Outlying Islands	UM	other	0	0	0	0	0	0	0		#DIV/0!	#DIV/0!	#DIV/0!	#DIV/0!	#DIV/0!	#DIV/0!
241	Uruguay	UY	South America	0	0	0	0	0	0	0		#DIV/0!	#DIV/0!	#DIV/0!	#DIV/0!	#DIV/0!	#DIV/0!
242	US Virgin Islands	VI	Caribbean	0	0	0	0	0	0	0		#DIV/0!	#DIV/0!	#DIV/0!	#DIV/0!	#DIV/0!	#DIV/0!
243	Uzbekistan	UZ	west asia	0	0	0	0	0	0	0		#DIV/0!	#DIV/0!	#DIV/0!	#DIV/0!	#DIV/0!	#DIV/0!
244	Vanuatu	VU	oceania	10925.8	0	975.8	7872.9	0	0	8848.7		0	0.0893115	0.720579	0	0	0.80989
245	Vatican City	VA	Europe	0	0	0	0	0	0	0		#DIV/0!	#DIV/0!	#DIV/0!	#DIV/0!	#DIV/0!	#DIV/0!
246	Venezuela	VE	South America	356557	93885.5	129487	2609.5	95599	131993	103.5		0.263311	0.363159	0.0073186	0.268117	0.370188	0.000290276
247	Vietnam	VN	Southeast Asia	1.30723e+06	86796.5	1.1207e+06	0	8296.8	1.1992e+06	0		0.0663973	0.857313	0	0.00634686	0.917363	0
248	Wallis and Futuna	WF	other	468.768	0	0	0	0	0	0		0	0	0	0	0	0
249	Yemen	YE	Middle East and North Africa	90666	4072.3	2421.1	0	6463.5	2063.6	0		0.0449154	0.0267035	0	0.0712891	0.0227605	0
250	Zambia	ZM	East Africa	2211.9	0	0	0	0	0	0		0	0	0	0	0	0
251	Zimbabwe	ZW	East Africa	75643.5	28401.8	0	0	53270.2	116.5	0		0.375469	0	0	0.704227	0.00154012	0
