# Supplementary material for: Assessing future impacts of tropical cyclones on global banana production
Source: Copernicus journal article supplement (doi:10.5194/nhess-2023-182), 2023-12-12
Supplement: Supplementary file 2 [file nhess-2023-182-supplement.zip]

### S3 Production tables of the zonal statistics. This enables calculating per region production and share

Table S3.1 RP10

| Row Labels                   | Sum of total production | Sum of present_class1 | Sum of present_class2 | Sum of present_class3 | Sum of future_class1 | Sum of future_class2 | Sum of future_class3 |
|------------------------------|-------------------------|-----------------------|-----------------------|-----------------------|----------------------|----------------------|----------------------|
| Caribbean                    | 1471666,734             | 145344,6993           | 1144092,053           | 0                     | 207739,899           | 1081696,854          | 0                    |
| Central Africa               | 2120346,098             | 0                     | 0                     | 0                     | 0                    | 0                    | 0                    |
| Central America              | 6759779,985             | 131601,4995           | 46828,2998            | 0                     | 127059,0002          | 95469,0993           | 0                    |
| East Africa                  | 10419154,6              | 216794,9999           | 28230,9999            | 0                     | 165583,0999          | 126669,3998          | 0                    |
| East Asia                    | 7466479,325             | 1919903,808           | 3939396,307           | 0                     | 413063,4991          | 5520880,315          | 0                    |
| Europe                       | 273793,5057             | 0                     | 0                     | 0                     | 219,6000061          | 0                    | 0                    |
| Middle East and North Africa | 1350525,399             | 0                     | 0                     | 0                     | 0                    | 0                    | 0                    |
| north america                | 6609,500012             | 0                     | 5501,600016           | 0                     | 0                    | 5501,600016          | 0                    |
| Oceania                      | 1042495,125             | 106627,7995           | 9467,699963           | 0                     | 131117,3996          | 11145,29997          | 0                    |
| other                        | 468,7675426             | 0                     | 0                     | 0                     | 0                    | 0                    | 0                    |
| South Africa                 | 329157,7004             | 0                     | 0                     | 0                     | 0                    | 0                    | 0                    |
| South America                | 14521905,79             | 30379,30008           | 0                     | 0                     | 79610,09969          | 0                    | 0                    |
| South Asia                   | 23371732,94             | 1483648,201           | 0                     | 0                     | 2887581,707          | 0                    | 0                    |
| Southeast Asia               | 15956888,51             | 3352997,108           | 1578694,504           | 0                     | 4871179,517          | 1952351,904          | 0                    |
| West Africa                  | 1897883,899             | 0                     | 0                     | 0                     | 0                    | 0                    | 0                    |
| West Asia                    | 115935,5992             | 0                     | 0                     | 0                     | 0                    | 0                    | 0                    |
| (blank)                      |                         |                       |                       |                       |                      |                      |                      |
| <b>Grand Total</b>           | <b>87104823,48</b>      | <b>7387297,415</b>    | <b>6752211,464</b>    | <b>0</b>              | <b>8883153,822</b>   | <b>8793714,473</b>   | <b>0</b>             |

Table S3.2 RP50

| Row Labels                   | Sum of total production | Sum of present_class1 | Sum of present_class2 | Sum of present_class3 | Sum of future_class1 | Sum of future_class2 | Sum of future_class3 |
|------------------------------|-------------------------|-----------------------|-----------------------|-----------------------|----------------------|----------------------|----------------------|
| Caribbean                    | 1471666,734             | 0                     | 1013962,315           | 275501,7381           | 0                    | 1029134,415          | 260329,6378          |
| Central Africa               | 2120346,098             | 0                     | 0                     | 0                     | 0                    | 0                    | 0                    |
| Central America              | 6759779,985             | 862419,702            | 333020,2995           | 0                     | 2247325,579          | 226116,9989          | 32598,2002           |
| East Africa                  | 10419154,6              | 126651,3997           | 273387,4997           | 0                     | 133661,5             | 322719,3996          | 0                    |
| East Asia                    | 7466479,325             | 367246,5002           | 5675014,316           | 8017,700001           | 867258,5075          | 5645004,913          | 224404,1019          |
| Europe                       | 273793,5057             | 33750,49962           | 0                     | 0                     | 1922,899982          | 31827,59964          | 0                    |
| Middle East and North Africa | 1350525,399             | 207812,0005           | 153,3000031           | 0                     | 11131,29995          | 200164,4006          | 0                    |
| north america                | 6609,500012             | 0                     | 5501,600016           | 0                     | 0                    | 0                    | 5501,600016          |
| Oceania                      | 1042495,125             | 79898,69977           | 131586,5996           | 0                     | 74286,39984          | 164627,1996          | 8848,699961          |
| other                        | 468,7675426             | 0                     | 0                     | 0                     | 0                    | 0                    | 0                    |
| South Africa                 | 329157,7004             | 1339,400005           | 0                     | 0                     | 10343,0999           | 0                    | 0                    |
| South America                | 14521905,79             | 146146,6011           | 97992,19955           | 0                     | 326463,5008          | 99882,6995           | 0                    |
| South Asia                   | 23371732,94             | 11016593,88           | 4245100,609           | 0                     | 13557142,88          | 3865152,708          | 0                    |
| Southeast Asia               | 15956888,51             | 4518558,505           | 3979373,508           | 436713,7024           | 2437861,495          | 6023503,017          | 1043544,803          |
| West Africa                  | 1897883,899             | 3459,900034           | 0                     | 0                     | 0                    | 3459,900034          | 0                    |
| West Asia                    | 115935,5992             | 0                     | 0                     | 0                     | 0                    | 0                    | 0                    |
| (blank)                      |                         |                       |                       |                       |                      |                      |                      |
| <b>Grand Total</b>           | <b>87104823,48</b>      | <b>17363877,08</b>    | <b>15755092,25</b>    | <b>720233,1404</b>    | <b>19667397,16</b>   | <b>17611593,25</b>   | <b>1575227,043</b>   |

Table S3.3 RP100

| Row Labels                   | Sum of total production | Sum of present_class1 | Sum of present_class2 | Sum of present_class3 | Sum of future_class1 | Sum of future_class2 | Sum of future_class3 |
|------------------------------|-------------------------|-----------------------|-----------------------|-----------------------|----------------------|----------------------|----------------------|
| Caribbean                    | 1471666,734             | 0                     | 286653,201            | 1002810,852           | 0                    | 430361,7002          | 859102,3526          |
| Central Africa               | 2120346,098             | 0                     | 0                     | 0                     | 0                    | 0                    | 0                    |
| Central America              | 6759779,985             | 2058391,781           | 837223,4975           | 0                     | 2403327,783          | 599799,8997          | 89167,89951          |
| East Africa                  | 10419154,6              | 114964,1999           | 336415,1997           | 0                     | 119790,8             | 298353,2998          | 82848,99974          |
| East Asia                    | 7466479,325             | 576860,303            | 5634280,813           | 223276,8019           | 857104,7089          | 4937821,107          | 990270,9077          |
| Europe                       | 273793,5057             | 4156,999989           | 29593,49963           | 0                     | 497                  | 33253,49962          | 0                    |
| Middle East and North Africa | 1350525,399             | 76551,40064           | 134921,9999           | 0                     | 6794,300024          | 209631,8005          | 0                    |
| north america                | 6609,500012             | 0                     | 0                     | 5501,600016           | 0                    | 0                    | 5501,600016          |
| Oceania                      | 1042495,125             | 50631,29997           | 199176,3995           | 0                     | 86955,80013          | 213896,0996          | 9467,699963          |
| other                        | 468,7675426             | 0                     | 0                     | 0                     | 0                    | 0                    | 0                    |
| South Africa                 | 329157,7004             | 10280,4999            | 0                     | 0                     | 31462,69962          | 505,7999992          | 0                    |
| South America                | 14521905,79             | 340210,6005           | 146222,0999           | 0                     | 362234,0009          | 149751,5999          | 0                    |
| South Asia                   | 23371732,94             | 7864428,965           | 9811141,419           | 154124,9001           | 8551649,16           | 9885716,822          | 0                    |
| Southeast Asia               | 15956888,51             | 1853649,298           | 6165126,312           | 1264474,005           | 2180054,999          | 6923495,011          | 1410661,704          |
| West Africa                  | 1897883,899             | 0                     | 3459,900034           | 0                     | 275,6000061          | 3459,900034          | 0                    |
| West Asia                    | 115935,5992             | 0                     | 0                     | 0                     | 0                    | 0                    | 0                    |
| (blank)                      |                         |                       |                       |                       |                      |                      |                      |
| <b>Grand Total</b>           | <b>87104823,48</b>      | <b>12950125,35</b>    | <b>23584214,34</b>    | <b>2650188,159</b>    | <b>14600146,85</b>   | <b>23686046,54</b>   | <b>3447021,164</b>   |

Table S3.4 RP200

| Row Labels                   | Sum of total production | Sum of present_class1 | Sum of present_class2 | Sum of present_class3 | Sum of future_class1 | Sum of future_class2 | Sum of future_class3 |
|------------------------------|-------------------------|-----------------------|-----------------------|-----------------------|----------------------|----------------------|----------------------|
| Caribbean                    | 1471666,734             | 0                     | 577,9999977           | 1288886,053           | 70910,80114          | 262,3999977          | 1289201,653          |
| Central Africa               | 2120346,098             | 0                     | 0                     | 0                     | 357087,798           | 0                    | 0                    |
| Central America              | 6759779,985             | 3789593,645           | 1455677,794           | 149610,3997           | 742314,8044          | 2260832,578          | 163973,7994          |
| East Africa                  | 10419154,6              | 108076,6              | 332788,8996           | 52009,99991           | 122156,5002          | 259052,8997          | 155885,2998          |
| East Asia                    | 7466479,325             | 861705,9075           | 5634542,013           | 244990,2019           | 764599,5072          | 4851467,809          | 1228121,407          |
| Europe                       | 273793,5057             | 497                   | 33253,49962           | 0                     | 0                    | 33750,49962          | 0                    |
| Middle East and North Africa | 1350525,399             | 7280,900036           | 210458,2005           | 0                     | 10273,84113          | 210556,4005          | 58,29999924          |
| north america                | 6609,500012             | 0                     | 0                     | 5501,600016           | 0                    | 0                    | 5501,600016          |
| Oceania                      | 1042495,125             | 65556,90034           | 226110,5995           | 7872,899958           | 106552,5002          | 237462,3995          | 12446,39997          |
| other                        | 468,7675426             | 0                     | 0                     | 0                     | 0                    | 0                    | 0                    |
| South Africa                 | 329157,7004             | 16027,69978           | 2860,399982           | 0                     | 44583,19997          | 10029,99989          | 0                    |
| South America                | 14521905,79             | 330236,4994           | 241232,1006           | 2609,5                | 316728,5995          | 261711,7006          | 103,5                |
| South Asia                   | 23371732,94             | 3897875,961           | 13786492,02           | 1371512,396           | 4359921,254          | 14678500,92          | 64948,69976          |
| Southeast Asia               | 15956888,51             | 1822205,101           | 6697344,811           | 1438400,504           | 3271527,401          | 7572122,311          | 1481259,904          |
| West Africa                  | 1897883,899             | 0                     | 3459,900034           | 0                     | 32935,32828          | 3459,900034          | 0                    |
| West Asia                    | 115935,5992             | 0                     | 0                     | 0                     | 0                    | 0                    | 0                    |
| (blank)                      |                         |                       |                       |                       |                      |                      |                      |
| <b>Grand Total</b>           | <b>87104823,48</b>      | <b>10899056,21</b>    | <b>28624798,24</b>    | <b>4561393,554</b>    | <b>10199591,53</b>   | <b>30379209,82</b>   | <b>4401500,563</b>   |
