# Supplementary material for: Assessing future impacts of tropical cyclones on global banana production
Source: Copernicus journal article supplement (doi:10.5194/nhess-2023-182), 2023-12-12
Supplement: Supplementary file 2 [file S1.xlsx]

## Sheet: Database 
S1 Tropical cyclones that affected banana plantation
Table S1									0.88
	Date	Land of event	Name Cyclone	Basin	Location of plantation	Wind speed (kt)	% destroyed	Windspeed (m/s) *0,511	(x0.88 Harper, 2010)	Link to Cyclone Track	Link to source	Additional information
	2012-12-05	The Philippines	Typhoon Pablo (Bopha)	North Western Pacific	Mindanao	150	1	77.1667	67.9067	NOAA: https://coast.noaa.gov/hurricanes/#map=4/32/-80	https://www.hurriyetdailynews.com/typhoon-destroys-quarter-of-philippine-banana-crop-36245 + https://www.rappler.com/business/17451-pablo-destroys-quarter-of-ph-banana-crop/	https://www.promusa.org/blogpost212-Typhoon-Pablo-flattens-banana-plantations
	1979	Dominica	Hurricane David	North Atlantic	"completely destroyed the country’s banana crop"	97	1	49.9011	43.913	Wind speed from article	https://pdf.sciencedirectassets.com/271787/1-s2.0-S0306919217X0002X/1-s2.0-S030691921630642X/main.pdf?X-Amz-Security-Token=IQoJb3JpZ2luX2VjEKD%2F%2F%2F%2F%2F%2F%2F%2F%2F%2FwEaCXVzLWVhc3QtMSJIMEYCIQC2fKXn04mCa5fpDnBboetGVvgC0YiFYlAUftp9QPVngQIhAMBrydbpStX7dmzWqRya2kJZ1o%2FTFYWHd3MtkZ4AWB9hKtUECIn%2F%2F%2F%2F%2F%2F%2F%2F%2F%2FwEQBRoMMDU5MDAzNTQ2ODY1Igz6aKIb5SjpvRwZqPsqqQRl0TeTnaBhFUu5kz6OwQk4BuncpX…
	2017-09-01	Dominican Republic	Hurricane Irma	North Atlantic	In 2017, around 60 percent of all banana harvests in the Dominican Republic were lost due to hurricane Irma.	90	0.6	46.3	40.744	NOAA: https://coast.noaa.gov/hurricanes/#map=4/32/-80	https://www.delaat.nl/en/knowledge-base/bananas-and-hurricanes-not-the-best-duo
	2020-11-01	Honduras	Hurrican Eta	North Atlantic	No specific location	30	0.82	15.4333	13.5813	NOAA: https://coast.noaa.gov/hurricanes/#map=4/32/-80	FAO market review (2022)	https://www.itfnet.org/v1/2021/12/honduras-banana-exports-slashed/
	2007-08-01	Martinique	Hurricane Dean	North Atlantic	no specific location, but region small enough to check cyclone track	80	1	41.1556	36.2169	Wind speed from article	https://www.reuters.com/article/us-storm-dean-bananas-idUSL1861011420070818	photo: https://www.flickr.com/photos/11729878@N04/sets/72157601570957993
	2007-08-01	Guadalope	Hurricane Dean	North Atlantic	no specific location, but region small enough to check cyclone track	100	0.9	51.4444	45.2711	wind speed from article	https://en.wikipedia.org/wiki/Effects_of_Hurricane_Dean_in_the_Lesser_Antilles	https://www.liberation.fr/societe/2007/08/19/le-cyclone-dean-a-fait-d-enormes-degats-en-guadeloupe-et-en-martinique_10656/#:~:text=Le%20cyclone%20a%20d%C3%A9truit%20environ,%2Fh%20sur%20l'%C3%Aele
	2022-09-01	Puerto Rico	Hurricane Fiona	North Atlantic	Southern puerto rico	75	0.9	38.5833	33.9533	NOAA: https://coast.noaa.gov/hurricanes/#map=4/32/-80	https://www.washingtonpost.com/business/2022/09/24/fiona-puerto-rico-farm-damage/
	2011-02-03	Queensland	Cyclone Yasi	South Pacific	North Queensland	80	0.75	41.1556	36.2169	NOAA: https://coast.noaa.gov/hurricanes/#map=4/32/-80	https://australianfoodtimeline.com.au/cyclone-yasi/
	2012-10-01	Jamaica	Hurricane Sandy	North Atlantic	St Mary	75	0.85	38.5833	33.9533	NOAA: https://coast.noaa.gov/hurricanes/#map=4/32/-80	https://nlj.gov.jm/history-notes/History%20of%20Hurricanes%20and%20Floods%20in%20Jamaica.pdf	https://www.ncbcapitalmarkets.com/research/latestnews/745-hurricane-sandy-damaged-over-85-of-jps-banana-crop + https://www.fruitnet.com/fresh-produce-journal/hurricane-sandy-affects-caribbean-produce/56401.article
	2015-08-01	Dominica	Storm Erika	North Atlantic	no specific location, but region small enough to check cyclone track	40	0.8	20.5778	18.1084	Windspeed from article	https://www.freshfruitportal.com/news/2015/09/01/erika-devastates-dominicas-banana-crop/	https://www.nhc.noaa.gov/data/tcr/AL052015_Erika.pdf
	2012-08-01	Dominican republic	Hurricane Isaac	North Atlantic	no specific location, but region small enough to check cyclone track	50	0.1	25.7222	22.6356	NOAA: https://coast.noaa.gov/hurricanes/#map=4/32/-80	https://www.czapp.com/analyst-insights/hurricane-fiona-damages-banana-and-cacao-production-in-dominican-republic/	https://www.freshfruitportal.com/news/2012/08/30/hurricane-isaac-damages-10-of-dominican-republic-banana-crop/
	2015-08-01	Dominican Republic	Storm Erika	North Atlantic	no specific location, but region small enough to check cyclone track	35	0.4	18.0056	15.8449	Windspeed from article	https://www.itfnet.org/v1/2015/10/dominican-republic-tropical-storm-leaves-behind-a-destroyed-banana-crop/	https://www.biotropic.com/index.php/en/home-de-de-2/412-tropensturm-hinterlaesst-zerstoerte-bananenernte-in-der-dominikanischen-republik-gb
	1998-10-01	Honduras	Hurricane Mitch	North Atlantic	no specific location	156	1	80.2533	70.6229	Windspeed from article	https://www.wsj.com/articles/SB910220842441318500	https://digital-media.fao.org/archive/Honduras--Banana-crop-destroyed-by-Hurricane-Mitch-2A6XC5MTORZ.html
	1988-09-01	Jamaica	Hurricane Gilbert	North Atlantic	no specific location	160	1	82.3111	72.4338	Windspeed from site	https://nlj.gov.jm/history-notes/History%20of%20Hurricanes%20and%20Floods%20in%20Jamaica.pdf
	1980-08-01	Jamaica	Hurricane Allen	North Atlantic	no specific location	165	1	84.8833	74.6973	Windspeed from site	https://nlj.gov.jm/history-notes/History%20of%20Hurricanes%20and%20Floods%20in%20Jamaica.pdf
	2021-06-01	Southern Mexico	Storm Dolores	North Eastern Pacific	60% destroyed in Colima, Gustavo Arceo Solis from which 9 000 ha (22 240 acres) of bananas in the state of Colima.	60	0.6	30.8667	27.1627	Windspeed from article	FAO market review (2022)	https://watchers.news/2021/06/22/60-percent-of-banana-crops-in-colima-wiped-out-by-tropical-storm-dolores/
	2021-08-01	Eastern Jamaica	Hurricane Grace	North Eastern Pacific	Banana plantations in Portland and St Mary. Also other agricultural loss in St. Ann, and St James,	50	0.29	25.7222	22.6356	NOAA: https://coast.noaa.gov/hurricanes/#map=4/32/-80	https://jis.gov.jm/50m-for-banana-and-plantain-farmers-affected-by-grace/
	2003-07-01	Philipines	Typhoon Imbudo / Harurot	North Western Pacific	San Mariano	90	0.98	46.3	40.744	NOAA: https://coast.noaa.gov/hurricanes/#map=4/32/-80	Huigen, M. G., & Jens, I. C. (2006) Socio-Economic Impact of Super Typhoon Harurot in San Mariano, Isabela, the Philippines.
	2021-03-01	Australia	Cyclone Niran	South Pacific	Far North Queensland coast	75	0.9	38.5833	33.9533	Windspeed from article	https://www.theguardian.com/australia-news/2021/mar/03/cyclone-niran-wipes-out-banana-crops-in-far-north-queensland	https://www.itfnet.org/v1/2021/12/australia-tc-niran-impacted-banana-farms-nearing-full-production-after-qrida-disaster-assistance-boost/
	2006-03-01	Australia	TC Larry	South Pacific	Queensland	100	0.85	51.4444	45.2711	NOAA: https://coast.noaa.gov/hurricanes/#map=4/32/-80	https://link.springer.com/chapter/10.1007/978-94-007-7269-4_14
	2021-08-01	Southern Mexico	Hurricane Grace	North Eastern Pacific	Veracruz, Tecolutla	100	1	51.4444	45.2711	Windspeed from article	https://www.zenger.news/2021/08/31/hurricane-grace-ravages-communities-in-veracruz-mexicans-complain-about-governments-slow-response/
	2007-08-01	Martinique	Hurricane Dean	North Atlantic	no specific location, but region small enough to check cyclone track	90	1	46.3	40.744	Windspeed from article	https://www.reuters.com/article/us-storm-dean-bananas-idUSL1861011420070818

## Sheet: Datasets
			Country	Cyclone	%destroyed	(m/s)
			Dominican republic	Hurricane Isaac	0.1	23
			Eastern Jamaica	Hurricane Grace	0.29	22.6356
			Dominican Republic	Storm Erika	0.4	15.8449
			Southern Mexico	Storm Dolores	0.6	27.1627
			Dominican Republic	Hurricane Irma	0.6	41
			Queensland	Cyclone Yasi	0.75	36
			Dominica	Storm Erika	0.8	18.1084
			Honduras	Hurrican Eta	0.82	13.5813
			Jamaica	Hurricane Sandy	0.85	33.9533
			Australia	TC Larry	0.85	45.2711
			Australia	Cyclone Niran	0.9	34
			Guadalope	Hurricane Dean	0.9	45.2711
			Puerto Rico	Hurricane Fiona	0.9	33.9533
			Philipines	Typhoon Imbudo / Harurot	0.98	40.744
			Honduras	Hurricane Mitch	1	71
			Martinique	Hurricane Dean	1	36.2169
			Martinique	Hurricane Dean	1	41
			Dominica	Hurricane David	1	43.913
			Southern Mexico	Hurricane Grace	1	45
			The Philippines	Typhoon Pablo (Bopha)	1	67.9067
			Jamaica	Hurricane Gilbert	1	72.4338
			Jamaica	Hurricane Allen	1	74.6973
			Windspeed interval	Average damage	Saffir Simpson	Damage level
			0-10	0.0001	No	No Damage
			10-25	0.482	No	Severe damage
			26-43	0.842222	1-3	Major damage		0	10	25	44
			44>	0.964286	3-5	Complete		0.0001	0.48	0.84	0.96
