# Supplementary material for: Assessing future impacts of tropical cyclones on global banana production
Source: Copernicus journal article supplement (doi:10.5194/nhess-2023-182), 2023-12-12
Supplement: Supplementary file 3 [file nhess-2023-182-supplement.zip]

# S1 Tropical cyclones that affected banana plantation

**Table S1.1**

| Date       | Land of event      | Name Cyclone          | Basin                 | Location of plantation                                                                                                                                     | Destroyed ha                                                                                         | Saffir<br>Simpsons<br>Category | Track chart | Maximum Sustained<br>WindSpeed |
|------------|--------------------|-----------------------|-----------------------|------------------------------------------------------------------------------------------------------------------------------------------------------------|------------------------------------------------------------------------------------------------------|--------------------------------|-------------|--------------------------------|
| 05/12/2012 | The Philippines    | Typhoon Pablo (Bopha) | North Western Pacific | The hurricane force winds and flash floods flattened wide swathes of the hillsides of Davao Oriental province and <b>Compostela Valley</b> , the centre of | 10000 / 25% loss of all crop production in PH                                                        | 5                              | Picture 1   | 140                            |
| 1979       | Dominica           | Hurricane David       | North Atlantic        | "completely destroyed the country's banana crop"                                                                                                           | Full destruction                                                                                     | 4                              | No picture  | 97                             |
| Sep/17     | Dominican Republic | Hurricane Irma        | North Atlantic        | for the three provinces of Monte Cristi, Valverde and Santiago,                                                                                            | 25,00%                                                                                               | 5                              | Picture 4   | 90                             |
| Nov/20     | Honduras           | Hurricane Eta         | North Atlantic        | Location that did not recover (so were fully destructed: Higuerito and Guachies                                                                            | 51% decrease in supply : 2,800ha of farms, equivalent to 82 per cent of the country's banana acreage | 5                              | Picture 5   | 149                            |
| Aug/07     | Martinique         | Hurricane Dean        | North Atlantic        | no specific location, but region small enough to check cyclone track                                                                                       | 100% destroyed in all Martinique.                                                                    | 5                              | Picture 8   | 90                             |
| Aug/07     | Guadalupe          | Hurricane Dean        | North Atlantic        | no specific location, but region small enough to check cyclone track                                                                                       | dependent economies of those three states, as well as that of Guadeloupe, destroying between         | 5                              | Picture 8   | 100                            |
| Sep/22     | Dominican Republic | Hurricane Fiona       | North Atlantic        | no specific location, but region small enough to check cyclone track                                                                                       | 10% of all bananan crop. 80000 tonnes of bananas                                                     | 4                              | Picture 9   | 25                             |
| Sep/22     | Puerto Rico        | Hurricane Fiona       | North Atlantic        | Guanica fully destructed                                                                                                                                   | 100million/About 80 percent of the island's crop value was lost.                                     | 4                              | Picture 9   | 100                            |
| Jan/11     | Queensland         | Cyclone Yasi          | South Pacific         | North Queensland                                                                                                                                           | 80-90% destroyed in Queensland / 75% of total                                                        | 4                              | Picture 10  | 55                             |
| Oct/12     | Jamaica            | Hurricane Sandy       | North Atlantic        | St Mary                                                                                                                                                    | production in Jamaica only by destroyence of St Mary                                                 | 5                              | Picture 11  | 69                             |
| Aug/15     | Dominica           | Storm Erika           | North Atlantic        | no specific location, but region small enough to check cyclone track                                                                                       | 80 % loss of all crop production                                                                     | x                              | Picture 12  | 40                             |
| Aug/12     | Dominican republic | Hurricane Isaac       | North Atlantic        | no specific location, but region small enough to check cyclone track                                                                                       | 10                                                                                                   | 1                              | Pcture 20   | 50                             |
| Aug/15     | Dominican Republic | Storm Erika           | North Atlantic        | no specific location, but region small enough to check cyclone track                                                                                       | 40% destroyed of all crop production                                                                 | x                              | Picture 12  | 45                             |
| Oct/98     | Honduras           | Hurricane Mitch       | North Atlantic        | no specific location                                                                                                                                       | Full destruction                                                                                     | 5                              | Picture 13  | 155                            |
| Sep/88     | Jamaica            | Hurricane Gilbert     | North Atlantic        | no specific location                                                                                                                                       | 100% destroyed                                                                                       | 5                              | No picture  | 160                            |
| Aug/80     | Jamaica            | Hurricane Allen       | North Atlantic        | no specific location                                                                                                                                       | Full destruction                                                                                     | 5                              | No picture  | 165                            |

|        |                 |                         |                       |                                                                           |                                                                   |   |            |     |
|--------|-----------------|-------------------------|-----------------------|---------------------------------------------------------------------------|-------------------------------------------------------------------|---|------------|-----|
| Jun/21 | Southern Mexico | Storm Dolores           | North Eastern Pacific | Arceo Solis from which 9 000 ha (22 240 acres) of bananas in the state of | supply by 5%: to 513000 ton (FAO)   60 % destroyed in             | 1 | Picture 17 | 57  |
| Aug/21 | Southern Mexico | Hurricane Grace         | North Eastern Pacific | Veracruz, Tecolutla                                                       | 100% destroyed                                                    | 2 | picture 18 | 110 |
| Aug/21 | Eastern Jamaica | Hurricane Grace         | North Eastern Pacific | Mary. Also other agricultural loss in Portland was estimated at \$165     | plantain sector, the loss to the sector is coming out at about 29 | x | picture 18 | 45  |
| Jul/03 | Philippines     | Typhoon Imbudo / Haruro | North Western Pacific | San Mariano                                                               | 98% destroyed                                                     | 4 | Picture 16 | 130 |
| Mar/21 | Australia       | Cyclone Niran           | South Pacific         | Far North Queensland coast                                                | 90-100% destroyed                                                 | 2 | Picture 19 | 65  |
| Mar/06 | Australia       | TC Larry                | South Pacific         | Queensland                                                                | 80-90% of banana crop                                             | 5 | Picture 14 | 130 |

| <b>% destroyed</b> | <b>Windspeed<br/>m/s (x0.88<br/>Harper, 2010)</b> | <b>Link to Cyclone Track</b>                                                                                                | <b>Additional info on destruction</b>                                                                                                                                                                                                 | <b>Link to source</b>                                                                                                                                                                                                                                                                                                                                                                    |
|--------------------|---------------------------------------------------|-----------------------------------------------------------------------------------------------------------------------------|---------------------------------------------------------------------------------------------------------------------------------------------------------------------------------------------------------------------------------------|------------------------------------------------------------------------------------------------------------------------------------------------------------------------------------------------------------------------------------------------------------------------------------------------------------------------------------------------------------------------------------------|
| 25%                | 72                                                | <a href="https://sharaku.eorc.jaxa.jp/cgi-bin/typ_db/typ_db.cgi">https://sharaku.eorc.jaxa.jp/cgi-bin/typ_db/typ_db.cgi</a> |                                                                                                                                                                                                                                       | <a href="https://www.hurriyetdailynews.com/typhoon-destroys-quarter-of-philippine-banana-crop-36245">https://www.hurriyetdailynews.com/typhoon-destroys-quarter-of-philippine-banana-crop-36245</a> +<br><a href="https://www.rappler.com/business/17451-pablo-destroys-quarter-of-ph-banana-crop/">https://www.rappler.com/business/17451-pablo-destroys-quarter-of-ph-banana-crop/</a> |
| 100%               | 50                                                |                                                                                                                             |                                                                                                                                                                                                                                       | <a href="https://pdf.sciencedirectassets.com/271787/1-s2.0-S0306919217X0002X/1-s2.0-S030691921630642X/main.pdf?X-Amz-Security-">https://pdf.sciencedirectassets.com/271787/1-s2.0-S0306919217X0002X/1-s2.0-S030691921630642X/main.pdf?X-Amz-Security-</a>                                                                                                                                |
| 60%                | 46                                                | <a href="https://reliefweb.int/map/turks-a">https://reliefweb.int/map/turks-a</a>                                           | <a href="https://www.delaat.nl/en/kn">https://www.delaat.nl/en/kn</a>                                                                                                                                                                 | Varma et al (2020) Mapping the impacts of hurricanes Maria and Irma on banana production area in the Dominican Republic                                                                                                                                                                                                                                                                  |
| 82%                | 77                                                | <a href="https://sharaku.eorc.jaxa.jp/cgi-bin/typ_db/typ_db.cgi">https://sharaku.eorc.jaxa.jp/cgi-bin/typ_db/typ_db.cgi</a> | <a href="https://www.itfnet.org/v1/2015/10/dominican-republic-tropical-storm-leaves-behind-a-destroyed-banana-crop/">https://www.itfnet.org/v1/2015/10/dominican-republic-tropical-storm-leaves-behind-a-destroyed-banana-crop/</a>   | FAO market review (2022)                                                                                                                                                                                                                                                                                                                                                                 |
| 100%               | 46                                                |                                                                                                                             | <a href="https://www.flickr.com/photos/14811420070818/">pgoto: https://www.flickr.com/photos/14811420070818/</a>                                                                                                                      | <a href="https://www.reuters.com/article/us-storm-dean-bananas-idUSL1861011420070818">https://www.reuters.com/article/us-storm-dean-bananas-idUSL1861011420070818</a>                                                                                                                                                                                                                    |
| 90%                | 51                                                | <a href="https://www.liberation.fr/societe">https://www.liberation.fr/societe</a>                                           | <a href="https://www.flickr.com/photos/14811420070818/">High resolution atmospheric and oceanic modelling: Impacts of Hurricane Dean over the</a>                                                                                     | <a href="https://en.wikipedia.org/wiki/Effects_of_Hurricane_Dean_in_the_Lesser_Antilles">https://en.wikipedia.org/wiki/Effects_of_Hurricane_Dean_in_the_Lesser_Antilles</a>                                                                                                                                                                                                              |
| 7%                 | 13                                                | <a href="https://sharaku.eorc.jaxa.jp/cgi-bin/typ_db/typ_db.cgi">https://sharaku.eorc.jaxa.jp/cgi-bin/typ_db/typ_db.cgi</a> |                                                                                                                                                                                                                                       | <a href="https://www.czapp.com/analyst-insights/hurricane-fiona-damages-banana-and-cacao-production-in-dominican-republic/">https://www.czapp.com/analyst-insights/hurricane-fiona-damages-banana-and-cacao-production-in-dominican-republic/</a>                                                                                                                                        |
| 100%               | 51                                                | <a href="https://sharaku.eorc.jaxa.jp/cgi-bin/typ_db/typ_db.cgi">https://sharaku.eorc.jaxa.jp/cgi-bin/typ_db/typ_db.cgi</a> | <a href="https://pipanews.com/hurricane-fiona-damages-banana-and-cacao-production-in-dominican-republic/">https://pipanews.com/hurricane-fiona-damages-banana-and-cacao-production-in-dominican-republic/</a>                         | <a href="https://www.npr.org/2022/09/24/1124950315/puerto-rico-plantain-crops-destroyed-hurricane-fiona">https://www.npr.org/2022/09/24/1124950315/puerto-rico-plantain-crops-destroyed-hurricane-fiona</a>                                                                                                                                                                              |
| 75%                | 28                                                | <a href="https://sharaku.eorc.jaxa.jp/cgi-bin/typ_db/typ_db.cgi">https://sharaku.eorc.jaxa.jp/cgi-bin/typ_db/typ_db.cgi</a> | <a href="https://www.smh.com.au/news/australian-food-timeline-com-au/cyclone-yasi/">https://www.smh.com.au/news/australian-food-timeline-com-au/cyclone-yasi/</a>                                                                     | <a href="https://australianfoodtimeline.com.au/cyclone-yasi/">https://australianfoodtimeline.com.au/cyclone-yasi/</a> + + Article Concatenated Hazards: Beer, Abbs, Alves, 2013                                                                                                                                                                                                          |
| 85%                | 35                                                | <a href="https://sharaku.eorc.jaxa.jp/cgi-bin/typ_db/typ_db.cgi">https://sharaku.eorc.jaxa.jp/cgi-bin/typ_db/typ_db.cgi</a> | <a href="https://www.ncbcapitalmarket.com/hurricane-fiona-damages-banana-and-cacao-production-in-dominican-republic/">https://www.ncbcapitalmarket.com/hurricane-fiona-damages-banana-and-cacao-production-in-dominican-republic/</a> | <a href="https://nlj.gov.jm/history-notes/History%20of%20Hurricanes%20and%20Floods%20in%20Jamaica.pdf">https://nlj.gov.jm/history-notes/History%20of%20Hurricanes%20and%20Floods%20in%20Jamaica.pdf</a>                                                                                                                                                                                  |
| 80%                | 21                                                | <a href="https://sharaku.eorc.jaxa.jp/cgi-bin/typ_db/typ_db.cgi">https://sharaku.eorc.jaxa.jp/cgi-bin/typ_db/typ_db.cgi</a> | <a href="https://www.nhc.noaa.gov/d">https://www.nhc.noaa.gov/d</a>                                                                                                                                                                   | <a href="https://www.freshfruitportal.com/news/2015/09/01/erika-devastates-dominicas-banana-crop/">https://www.freshfruitportal.com/news/2015/09/01/erika-devastates-dominicas-banana-crop/</a>                                                                                                                                                                                          |
| 10%                | 26                                                | <a href="https://sharaku.eorc.jaxa.jp/cgi-bin/typ_db/typ_db.cgi">https://sharaku.eorc.jaxa.jp/cgi-bin/typ_db/typ_db.cgi</a> | <a href="https://www.freshfruitportal.com/news/2015/09/01/erika-devastates-dominicas-banana-crop/">https://www.freshfruitportal.com/news/2015/09/01/erika-devastates-dominicas-banana-crop/</a>                                       | <a href="https://www.czapp.com/analyst-insights/hurricane-fiona-damages-banana-and-cacao-production-in-dominican-republic/">https://www.czapp.com/analyst-insights/hurricane-fiona-damages-banana-and-cacao-production-in-dominican-republic/</a>                                                                                                                                        |
| 40%                | 23                                                | <a href="https://sharaku.eorc.jaxa.jp/cgi-bin/typ_db/typ_db.cgi">https://sharaku.eorc.jaxa.jp/cgi-bin/typ_db/typ_db.cgi</a> | <a href="https://www.biotropic.com/2015/10/dominican-republic-tropical-storm-leaves-behind-a-destroyed-banana-crop/">https://www.biotropic.com/2015/10/dominican-republic-tropical-storm-leaves-behind-a-destroyed-banana-crop/</a>   | <a href="https://www.itfnet.org/v1/2015/10/dominican-republic-tropical-storm-leaves-behind-a-destroyed-banana-crop/">https://www.itfnet.org/v1/2015/10/dominican-republic-tropical-storm-leaves-behind-a-destroyed-banana-crop/</a>                                                                                                                                                      |
| 100%               | 80                                                | <a href="https://sharaku.eorc.jaxa.jp/cgi-bin/typ_db/typ_db.cgi">https://sharaku.eorc.jaxa.jp/cgi-bin/typ_db/typ_db.cgi</a> |                                                                                                                                                                                                                                       | <a href="https://www.wsj.com/articles/SB910220842441318500">https://www.wsj.com/articles/SB910220842441318500</a>                                                                                                                                                                                                                                                                        |
| 100%               | 82                                                |                                                                                                                             |                                                                                                                                                                                                                                       | <a href="https://nlj.gov.jm/history-notes/History%20of%20Hurricanes%20and%20Floods%20in%20Jamaica.pdf">https://nlj.gov.jm/history-notes/History%20of%20Hurricanes%20and%20Floods%20in%20Jamaica.pdf</a>                                                                                                                                                                                  |
| 100%               | 85                                                | <a href="https://en.wikipedia.org/wiki/Hurricane_Allen">https://en.wikipedia.org/wiki/Hurricane_Allen</a>                   |                                                                                                                                                                                                                                       | <a href="https://nlj.gov.jm/history-notes/History%20of%20Hurricanes%20and%20Floods%20in%20Jamaica.pdf">https://nlj.gov.jm/history-notes/History%20of%20Hurricanes%20and%20Floods%20in%20Jamaica.pdf</a>                                                                                                                                                                                  |

|      |    |                                                                                                                             |                                                                                                                                                                                                                           |                                                                                                                                                                                                                                   |
|------|----|-----------------------------------------------------------------------------------------------------------------------------|---------------------------------------------------------------------------------------------------------------------------------------------------------------------------------------------------------------------------|-----------------------------------------------------------------------------------------------------------------------------------------------------------------------------------------------------------------------------------|
| 60%  | 29 | Sharaku.eorc.jaxa                                                                                                           | <a href="https://watchers.news/2021/">https://watchers.news/2021/</a>                                                                                                                                                     | FAO market review (2022)                                                                                                                                                                                                          |
| 100% | 57 | <a href="https://sharaku.eorc.jaxa.jp/cgi-bin/typ_db/typ_db.cgi">https://sharaku.eorc.jaxa.jp/cgi-bin/typ_db/typ_db.cgi</a> | <a href="https://mexiconewsdaily.com/news/hurricane-grace-ravages-communities-in-veracruz-mexicans-2021-08-31/">https://mexiconewsdaily.com/news/hurricane-grace-ravages-communities-in-veracruz-mexicans-2021-08-31/</a> | <a href="https://www.zenger.news/2021/08/31/hurricane-grace-ravages-communities-in-veracruz-mexicans-2021-08-31/">https://www.zenger.news/2021/08/31/hurricane-grace-ravages-communities-in-veracruz-mexicans-2021-08-31/</a>     |
| 29%  | 23 | <a href="https://sharaku.eorc.jaxa.jp/cgi-bin/typ_db/typ_db.cgi">https://sharaku.eorc.jaxa.jp/cgi-bin/typ_db/typ_db.cgi</a> | <a href="https://jis.gov.jm/50m-for-b">https://jis.gov.jm/50m-for-b</a>                                                                                                                                                   | <a href="https://en.wikipedia.org/wiki/Hurricane_Grace">https://en.wikipedia.org/wiki/Hurricane_Grace</a>                                                                                                                         |
| 98%  | 67 | <a href="https://sharaku.eorc.jaxa.jp/cgi-bin/typ_db/typ_db.cgi">https://sharaku.eorc.jaxa.jp/cgi-bin/typ_db/typ_db.cgi</a> |                                                                                                                                                                                                                           | Huigen, M. G., & Jens, I. C. (2006) Socio-Economic Impact of Super Typhoon Harurot in San Mariano, Isabela, the Philippines.                                                                                                      |
| 90%  | 33 | <a href="https://sharaku.eorc.jaxa.jp/cgi-bin/typ_db/typ_db.cgi">https://sharaku.eorc.jaxa.jp/cgi-bin/typ_db/typ_db.cgi</a> | <a href="https://www.itfnet.org/v1/2021/03/03/cyclone-niran-wipes-out-banana-crops-in-australia/">https://www.itfnet.org/v1/2021/03/03/cyclone-niran-wipes-out-banana-crops-in-australia/</a>                             | <a href="https://www.theguardian.com/australia-news/2021/mar/03/cyclone-niran-wipes-out-banana-crops-in-australia/">https://www.theguardian.com/australia-news/2021/mar/03/cyclone-niran-wipes-out-banana-crops-in-australia/</a> |
| 80%  | 67 | <a href="https://sharaku.eorc.jaxa.jp/cgi-bin/typ_db/typ_db.cgi">https://sharaku.eorc.jaxa.jp/cgi-bin/typ_db/typ_db.cgi</a> | <a href="https://www.smh.com.au/news/2021/03/03/cyclone-niran-wipes-out-banana-crops-in-australia/">https://www.smh.com.au/news/2021/03/03/cyclone-niran-wipes-out-banana-crops-in-australia/</a>                         | <a href="https://link.springer.com/chapter/10.1007/978-94-007-7269-4_14">https://link.springer.com/chapter/10.1007/978-94-007-7269-4_14</a>                                                                                       |

Figure S1.1

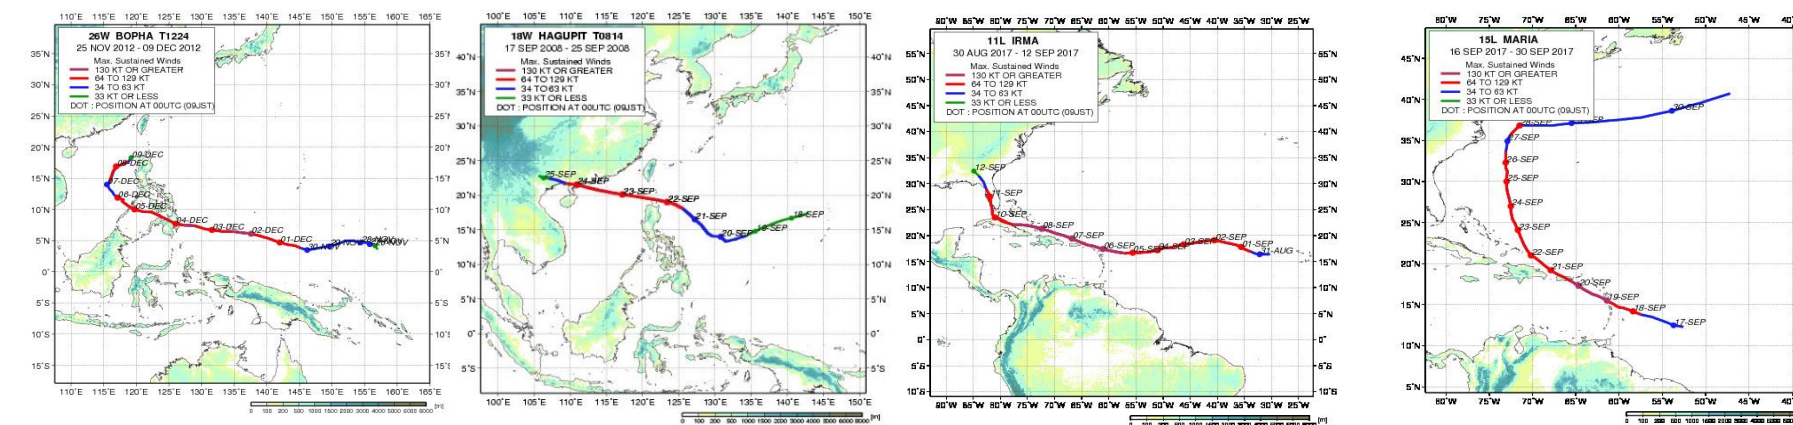

Picture 1: Bopha Track Chart

Picture 2: Hagupit Track Chart

Picture 3: Irma Track Chart

Picture 4: Maria Track Chart

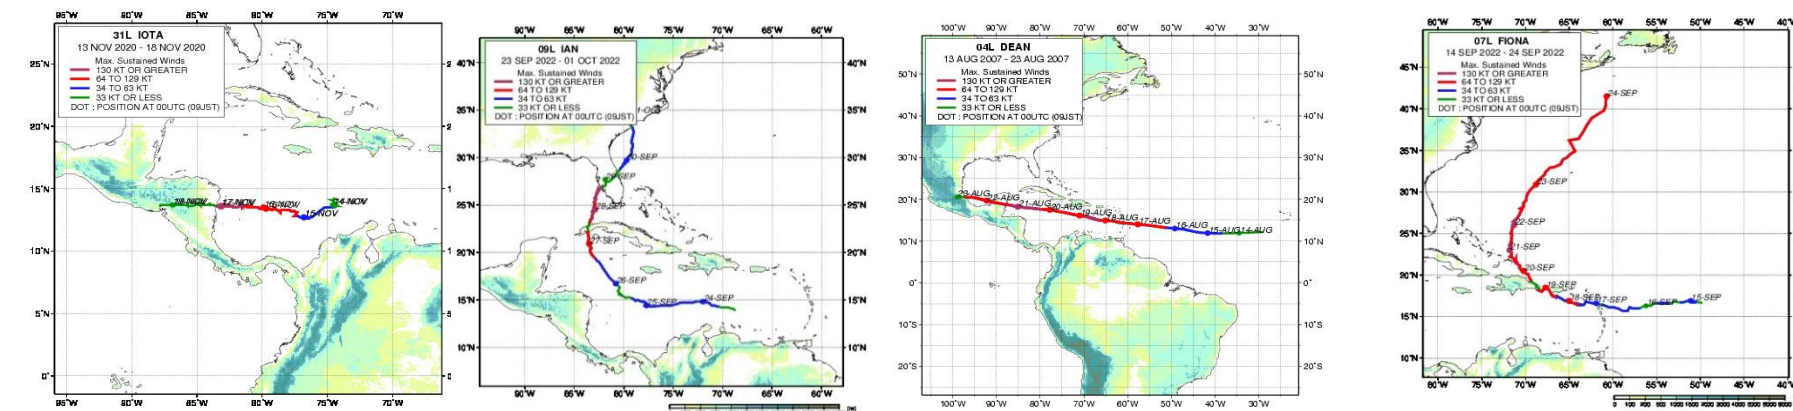

Picture 6: Iota Track Chart

Picture 7: Ian Track Chart

Picture 8: Dean Track Chart

Picture 9: Fiona Track Chart

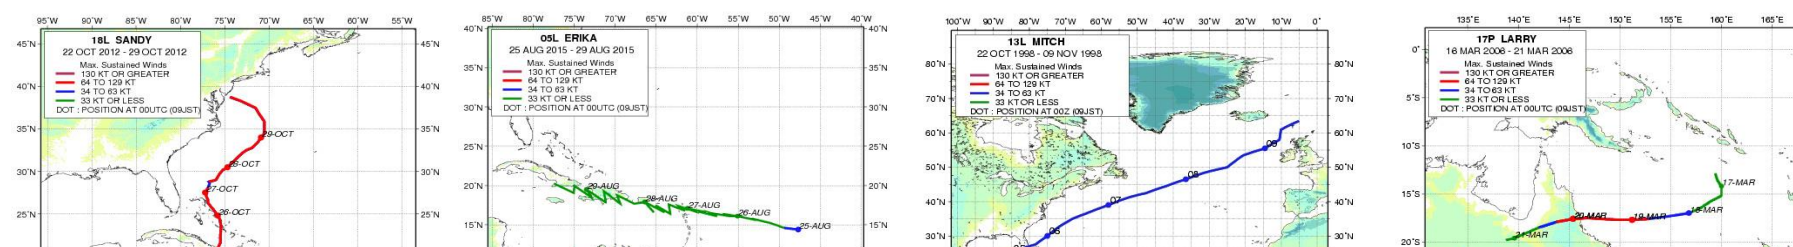

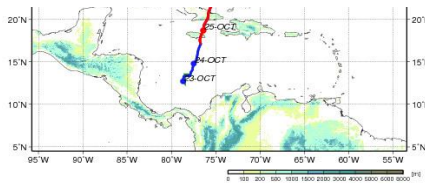

Picture 11: Sandy Track Chart

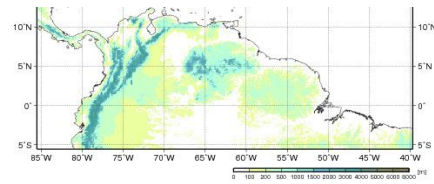

Picture 12: Erika Track Chart

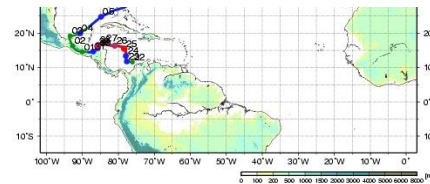

Picture 13: Mitch Track Chart

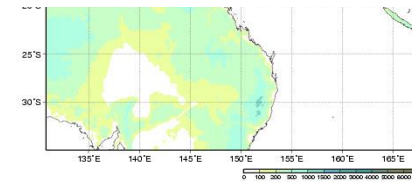

Picture 14: Larry Track Chart

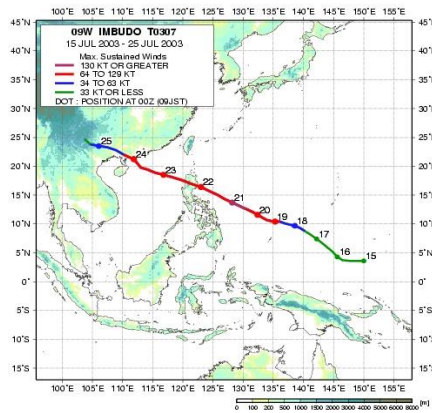

Picture 16: Imbudo Track Chart

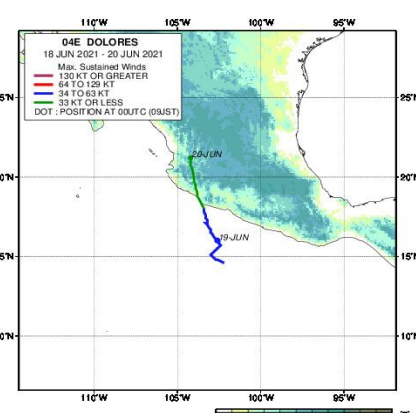

Picture 17: Dolores Track Chart

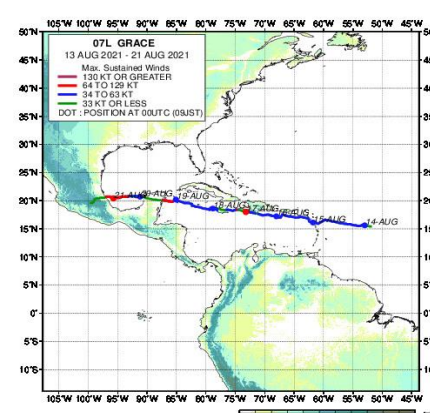

Picture 18: Grace Track Chart

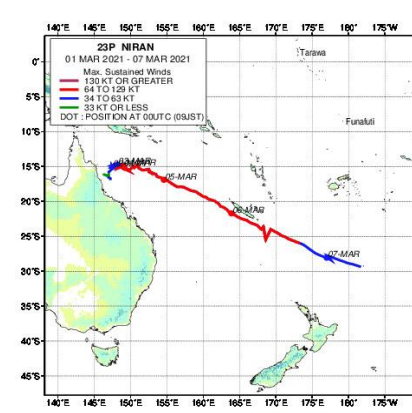

Picture 19: Niran Track Chart

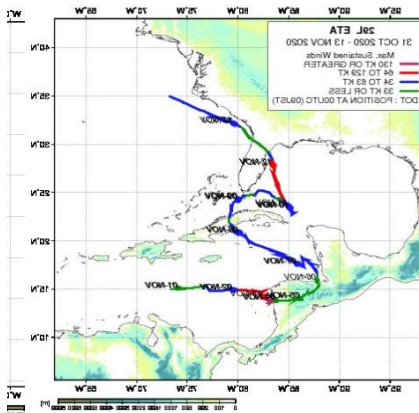

Picture 5: Eta Track Chart

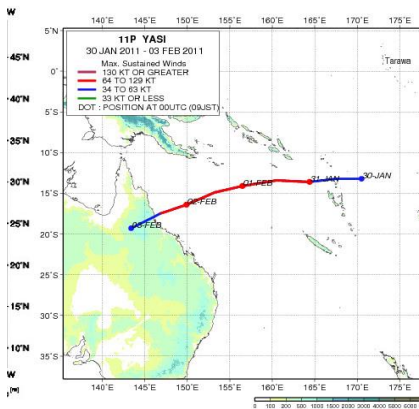

Picture 10: Yasi Track Chart

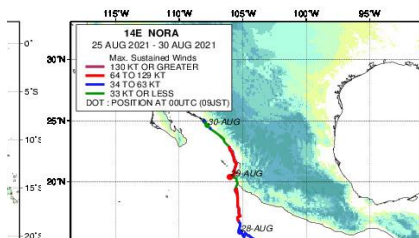

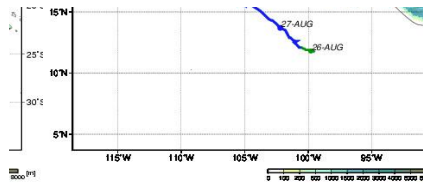

Picture 15: Nora Track Chart

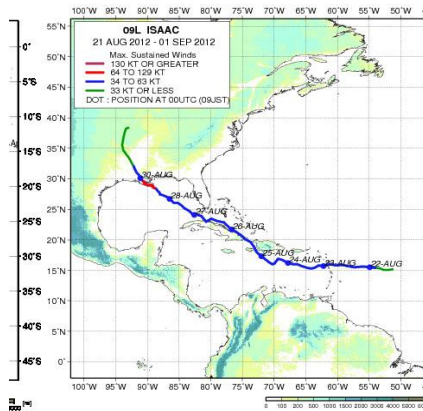

Picture 20: Hurrican Isaac TrackCh

**Table S1.2**

| Country                       | % destroyed | windspeed (m/s) | x 0.88 (Harper, 2010) |
|-------------------------------|-------------|-----------------|-----------------------|
| Dominican Republic            | 7%          | 13              | 11,3                  |
| Dominica                      | 80%         | 21              | 18,1                  |
| Eastern Jamaica               | 29%         | 23              | 20,4                  |
| Dominican Republic            | 40%         | 23              | 20,4                  |
| Dominican republic            | 10%         | 26              | 22,6                  |
| Queensland                    | 75%         | 28              | 24,9                  |
| Southern Mexico               | 60%         | 29              | 25,8                  |
| Australia                     | 90%         | 33              | 29,4                  |
| Jamaica                       | 85%         | 35              | 30,8                  |
| Dominican Republic            | 60%         | 46              | 40,5                  |
| Martinique                    | 100%        | 46              | 40,7                  |
| Dominica                      | 100%        | 50              | 43,9                  |
| Guadalope                     | 90%         | 51              | 45,3                  |
| Puerto Rico                   | 100%        | 51              | 45,3                  |
| Southern Mexico               | 100%        | 57              | 49,8                  |
| Australia                     | 85%         | 67              | 58,9                  |
| Philipines                    | 98%         | 67              | 58,9                  |
| The Philippines               | 100%        | 72              | 63,4                  |
| Honduras (hieguerto en Huegi) | 100%        | 77              | 67,5                  |
| Honduras                      | 100%        | 80              | 70,2                  |
| Jamaica                       | 100%        | 82              | 72,4                  |
| Jamaica                       | 100%        | 85              | 74,7                  |

**Table S1.4**

| Windspeed interval | Average damage | Saffir Simpson | Damage level  |
|--------------------|----------------|----------------|---------------|
| 0-10               | 0%             | No             | No Damage     |
| 10-25              | 40%            | No             | Severe damage |
| 26-43              | 79%            | 1-3            | Major damage  |
| 44>                | 97%            | 3-5            | Complete      |

**Table S1.3**

| Input variable | Input variable2 | Damage ratio |
|----------------|-----------------|--------------|
| v1             | d1              | 7%           |
| v2             | d2              | 80%          |
| v3             | d3              | 29%          |
| v4             | d4              | 40%          |
| v5             | d5              | 10%          |
| v6             | d6              | 75%          |
| v7             | d7              | 60%          |
| v8             | d8              | 90%          |
| v9             | d9              | 85%          |
| v10            | d10             | 60%          |
| v11            | d11             | 100%         |
| v12            | d12             | 100%         |
| v13            | d13             | 90%          |
| v14            | d14             | 100%         |
| v15            | d15             | 100%         |
| v16            | d16             | 85%          |
| v17            | d17             | 98%          |
| v18            | d18             | 100%         |
| v19            | d19             | 100%         |
| v20            | d20             | 100%         |
| v21            | d21             | 100%         |
| v22            | d22             | 100%         |
