# Supplementary material for: Assessing future impacts of tropical cyclones on global banana production
Source: Copernicus journal article supplement (doi:10.5194/nhess-2023-182), 2023-12-12
Supplement: Supplementary file 4 [file nhess-2023-182-supplement.zip]

## S2 Global summary of total banana producing area - Comparisong of impact between current and future climate.

57924

Table S2.1

|          | Present |       |       | Future |       |       |
|----------|---------|-------|-------|--------|-------|-------|
|          | RP10    | RP100 | RP200 | RP10   | RP100 | RP200 |
| Severe   | 5890    | 5917  | 6092  | 6345   | 7086  | 7515  |
| Major    | 3645    | 12245 | 12921 | 5488   | 12587 | 13382 |
| Complete | 0       | 1835  | 3660  | 0      | 2755  | 4342  |

Table S2.2 Shares

|          | Present |       |       | Future |       |       |
|----------|---------|-------|-------|--------|-------|-------|
|          | RP10    | RP100 | RP200 | RP10   | RP100 | RP200 |
| Severe   | 10,2%   | 10,2% | 10,5% | 11,0%  | 12,2% | 13,0% |
| Major    | 6,3%    | 21,1% | 22,3% | 9,5%   | 21,7% | 23,1% |
| Complete | 0,0%    | 3,2%  | 6,3%  | 0,0%   | 4,8%  | 7,5%  |

Table S2.3 difference present vs future climate conditions

|          | RP10  | RP100 | RP200 |
|----------|-------|-------|-------|
| Severe   | 7,7%  | 19,8% | 23,4% |
| Major    | 50,6% | 2,8%  | 3,6%  |
| Complete |       | 50,1% | 18,6% |

Table S2.4 Region - absolute

RP 100

| Region                       | Major   |        | Complete |        |
|------------------------------|---------|--------|----------|--------|
|                              | Present | Future | Present  | Future |
| Caribbean                    | 549     | 600    | 771      | 720    |
| Central America              | 617     | 396    | 0        | 47     |
| South America                | 200     | 209    | 0        | 0      |
| West Africa                  | 14      | 14     | 0        | 0      |
| East Africa                  | 2764    | 2852   | 0        | 315    |
| South Africa                 | 0       | 3      | 0        | 0      |
| Middle East and North Africa | 89      | 121    | 0        | 0      |
| East Asia                    | 1993    | 1841   | 82       | 319    |
| South Asia                   | 2850    | 2744   | 37       | 0      |
| Southeast Asia               | 2826    | 3446   | 927      | 1262   |
| Oceania                      | 301     | 304    | 0        | 74     |

Table S2.5 Region - relative

| Region                       | Major   |        | Complete |        |
|------------------------------|---------|--------|----------|--------|
|                              | Present | Future | Present  | Future |
| Caribbean                    | 40,5%   | 44,3%  | 56,9%    | 53,2%  |
| Central America              | 38,0%   | 24,4%  | 0,0%     | 2,9%   |
| South America                | 1,8%    | 1,9%   | 0,0%     | 0,0%   |
| West Africa                  | 0,3%    | 0,3%   | 0,0%     | 0,0%   |
| East Africa                  | 29,5%   | 30,4%  | 0,0%     | 3,4%   |
| South Africa                 | 0,0%    | 0,9%   | 0,0%     | 0,0%   |
| Middle East and North Africa | 12,3%   | 0,0%   | 0,0%     | 0,0%   |
| East Asia                    | 66,8%   | 61,7%  | 2,7%     | 10,7%  |
| South Asia                   | 39,6%   | 38,1%  | 0,5%     | 0,0%   |
| Southeast Asia               | 24,5%   | 29,9%  | 8,0%     | 10,9%  |
| Oceania                      | 21,0%   | 21,2%  | 0,0%     | 5,2%   |

Fig. S2.1 Present climate conditions

RP10

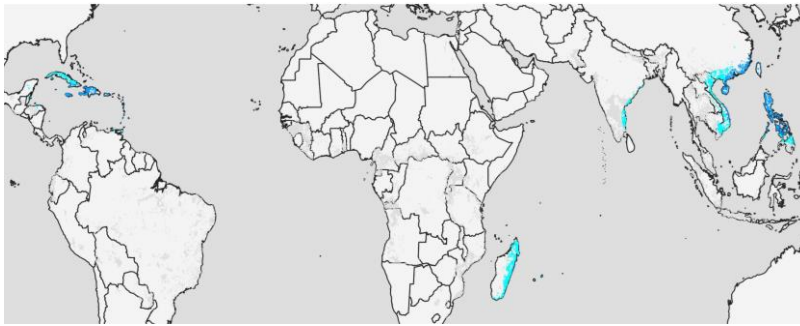

RP100

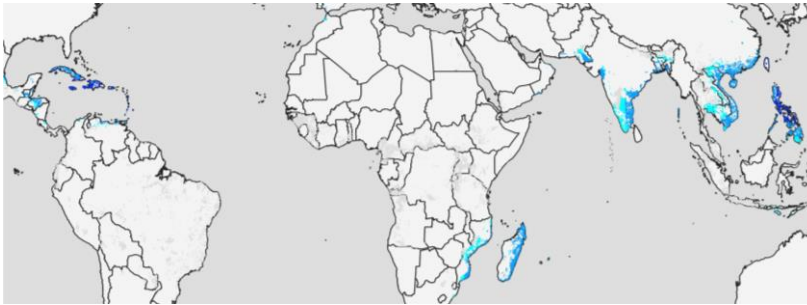

RP200

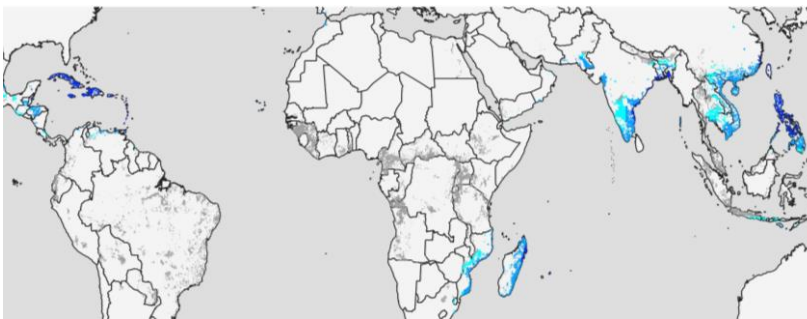

Fig. S2.1 Future climate conditions

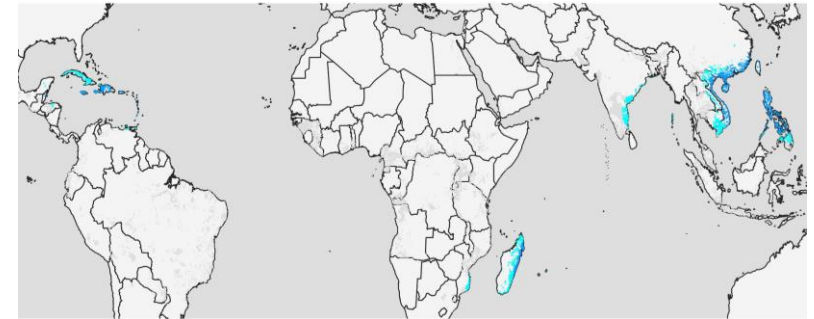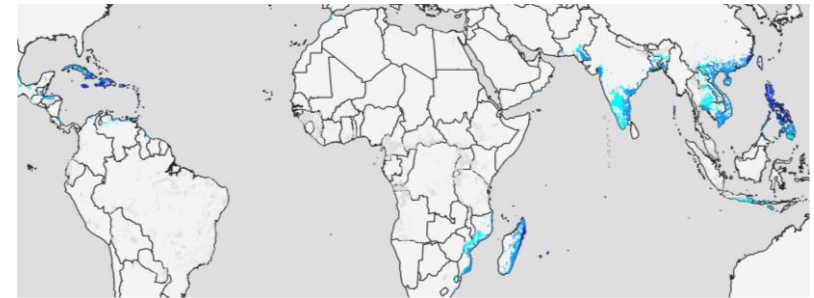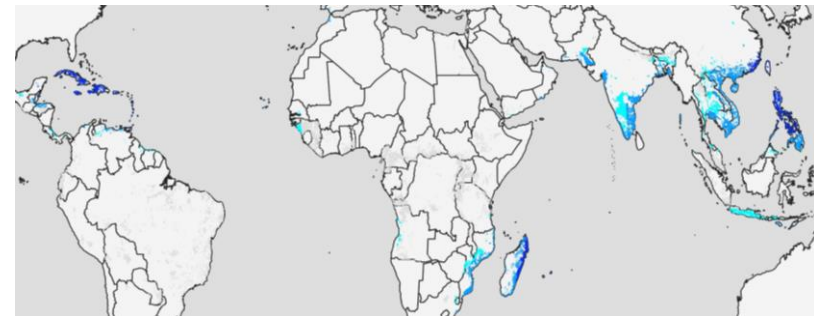

Damage level

■ No Damage

■ Moderate Damage

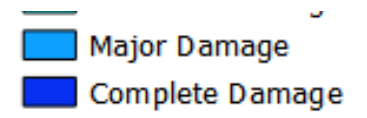

Table S2.6 Pivot 10\_P

| Row Labels                       | Severe     | Major      | Sum of Banana |
|----------------------------------|------------|------------|---------------|
| <b>Caribbean</b>                 | <b>579</b> | <b>741</b> | <b>1354</b>   |
| Anguilla                         | 0          | 0          | 0             |
| Antigua and Barbuda              | 0          | 2          | 2             |
| Aruba                            | 0          | 0          | 0             |
| Bahamas                          | 5          | 0          | 5             |
| Barbados                         | 0          | 4          | 4             |
| Bermuda                          | 0          | 1          | 1             |
| Bonaire                          | 0          | 0          | 0             |
| British Virgin Islands           | 0          | 1          | 1             |
| Cayman Islands                   | 0          | 2          | 2             |
| Cuba                             | 556        | 91         | 647           |
| Curacao                          | 0          | 0          | 0             |
| Dominica                         | 0          | 6          | 6             |
| Dominican Republic               | 0          | 238        | 238           |
| Grenada                          | 0          | 3          | 3             |
| Guadeloupe                       | 0          | 6          | 6             |
| Haiti                            | 0          | 229        | 229           |
| Jamaica                          | 0          | 94         | 94            |
| Martinique                       | 0          | 8          | 8             |
| Montserrat                       | 0          | 2          | 2             |
| Puerto Rico                      | 0          | 45         | 45            |
| Saba                             | 0          | 0          | 0             |
| Saint Barthelemy                 | 0          | 0          | 0             |
| Saint Eustatius                  | 0          | 0          | 0             |
| Saint Kitts and Nevis            | 0          | 0          | 0             |
| Saint Lucia                      | 0          | 5          | 5             |
| Saint Martin                     | 0          | 0          | 0             |
| Saint Vincent and the Grenadines | 0          | 4          | 4             |
| Sint Maarten                     | 0          | 0          | 0             |
| Suriname                         | 0          | 0          | 34            |
| Trinidad and Tobago              | 18         | 0          | 18            |
| Turks and Caicos Islands         | 0          | 0          | 0             |
| US Virgin Islands                | 0          | 0          | 0             |
| <b>Central Africa</b>            | <b>0</b>   | <b>0</b>   | <b>5457</b>   |
| Angola                           | 0          | 0          | 1728          |
| Central African Republic         | 0          | 0          | 1415          |
| Congo                            | 0          | 0          | 492           |
| Congo DRC                        | 0          | 0          | 1563          |
| Equatorial Guinea                | 0          | 0          | 199           |
| Gabon                            | 0          | 0          | 60            |
| <b>Central America</b>           | <b>140</b> | <b>7</b>   | <b>1622</b>   |
| Belize                           | 27         | 0          | 27            |
| Costa Rica                       | 0          | 0          | 67            |
| El Salvador                      | 0          | 0          | 1             |
| Guatemala                        | 0          | 0          | 264           |
| Honduras                         | 36         | 0          | 448           |
| Mexico                           | 77         | 7          | 606           |
| Nicaragua                        | 0          | 0          | 36            |

|                        |             |             |             |
|------------------------|-------------|-------------|-------------|
| Panama                 | 0           | 0           | 173         |
| <b>East Africa</b>     | <b>1889</b> | <b>62</b>   | <b>9375</b> |
| Burundi                | 0           | 0           | 206         |
| Comoros                | 0           | 0           | 0           |
| Djibouti               | 0           | 0           | 0           |
| Eritrea                | 0           | 0           | 0           |
| Ethiopia               | 0           | 0           | 831         |
| Kenya                  | 0           | 0           | 583         |
| Madagascar             | 1889        | 51          | 2153        |
| Malawi                 | 0           | 0           | 104         |
| Mauritius              | 0           | 11          | 11          |
| Mayotte                | 0           | 0           | 0           |
| Mozambique             | 0           | 0           | 1997        |
| Rwanda                 | 0           | 0           | 92          |
| Somalia                | 0           | 0           | 100         |
| South Sudan            | 0           | 0           | 553         |
| Tanzania               | 0           | 0           | 1598        |
| Uganda                 | 0           | 0           | 1062        |
| Zambia                 | 0           | 0           | 6           |
| Zimbabwe               | 0           | 0           | 79          |
| <b>East Asia</b>       | <b>806</b>  | <b>1263</b> | <b>2982</b> |
| China                  | 806         | 1263        | 2982        |
| Japan                  | 0           | 0           | 0           |
| Mongolia               | 0           | 0           | 0           |
| North Korea            | 0           | 0           | 0           |
| South Korea            | 0           | 0           | 0           |
| <b>Europe</b>          | <b>0</b>    | <b>0</b>    | <b>80</b>   |
| Albania                | 0           | 0           | 0           |
| Andorra                | 0           | 0           | 0           |
| Austria                | 0           | 0           | 0           |
| Azores                 | 0           | 0           | 0           |
| Belarus                | 0           | 0           | 0           |
| Belgium                | 0           | 0           | 0           |
| Bosnia and Herzegovina | 0           | 0           | 0           |
| Bouvet Island          | 0           | 0           | 0           |
| Bulgaria               | 0           | 0           | 0           |
| Canarias               | 0           | 0           | 2           |
| Croatia                | 0           | 0           | 0           |
| Cyprus                 | 0           | 0           | 9           |
| Czech Republic         | 0           | 0           | 0           |
| Denmark                | 0           | 0           | 0           |
| Estonia                | 0           | 0           | 0           |
| Faroe Islands          | 0           | 0           | 0           |
| Finland                | 0           | 0           | 0           |
| France                 | 0           | 0           | 0           |
| Germany                | 0           | 0           | 0           |
| Gibraltar              | 0           | 0           | 0           |
| Greece                 | 0           | 0           | 0           |
| Greenland              | 0           | 0           | 0           |
| Guernsey               | 0           | 0           | 0           |

|                                     |          |          |            |
|-------------------------------------|----------|----------|------------|
| Hungary                             | 0        | 0        | 0          |
| Iceland                             | 0        | 0        | 0          |
| Ireland                             | 0        | 0        | 0          |
| Isle of Man                         | 0        | 0        | 0          |
| Italy                               | 0        | 0        | 0          |
| Jersey                              | 0        | 0        | 0          |
| Latvia                              | 0        | 0        | 0          |
| Liechtenstein                       | 0        | 0        | 0          |
| Lithuania                           | 0        | 0        | 0          |
| Luxembourg                          | 0        | 0        | 0          |
| Madeira                             | 0        | 0        | 0          |
| Malta                               | 0        | 0        | 0          |
| Moldova                             | 0        | 0        | 0          |
| Monaco                              | 0        | 0        | 0          |
| Montenegro                          | 0        | 0        | 0          |
| Netherlands                         | 0        | 0        | 0          |
| North Macedonia                     | 0        | 0        | 0          |
| Norway                              | 0        | 0        | 0          |
| Poland                              | 0        | 0        | 0          |
| Portugal                            | 0        | 0        | 9          |
| Romania                             | 0        | 0        | 0          |
| Russian Federation                  | 0        | 0        | 0          |
| San Marino                          | 0        | 0        | 0          |
| Serbia                              | 0        | 0        | 0          |
| Slovakia                            | 0        | 0        | 0          |
| Slovenia                            | 0        | 0        | 0          |
| Spain                               | 0        | 0        | 60         |
| Svalbard                            | 0        | 0        | 0          |
| Sweden                              | 0        | 0        | 0          |
| Switzerland                         | 0        | 0        | 0          |
| Ukraine                             | 0        | 0        | 0          |
| United Kingdom                      | 0        | 0        | 0          |
| Vatican City                        | 0        | 0        | 0          |
| <b>Middle East and North Africa</b> | <b>0</b> | <b>0</b> | <b>725</b> |
| Algeria                             | 0        | 0        | 0          |
| Bahrain                             | 0        | 0        | 0          |
| Egypt                               | 0        | 0        | 258        |
| Iran                                | 0        | 0        | 32         |
| Iraq                                | 0        | 0        | 1          |
| Israel                              | 0        | 0        | 104        |
| Jordan                              | 0        | 0        | 8          |
| Kuwait                              | 0        | 0        | 0          |
| Lebanon                             | 0        | 0        | 14         |
| Libya                               | 0        | 0        | 0          |
| Morocco                             | 0        | 0        | 53         |
| Oman                                | 0        | 0        | 83         |
| Palestinian Territory               | 0        | 0        | 3          |
| Qatar                               | 0        | 0        | 0          |
| Saudi Arabia                        | 0        | 0        | 0          |
| Sudan                               | 0        | 0        | 1          |

|                                          |           |           |             |
|------------------------------------------|-----------|-----------|-------------|
| Syria                                    | 0         | 0         | 0           |
| Tunisia                                  | 0         | 0         | 0           |
| United Arab Emirates                     | 0         | 0         | 0           |
| Yemen                                    | 0         | 0         | 168         |
| <b>north america</b>                     | <b>0</b>  | <b>18</b> | <b>18</b>   |
| Canada                                   | 0         | 0         | 0           |
| Saint Pierre and Miquelon                | 0         | 0         | 0           |
| United States                            | 0         | 18        | 18          |
| <b>Oceania</b>                           | <b>58</b> | <b>74</b> | <b>1431</b> |
| American Samoa                           | 0         | 0         | 0           |
| Australia                                | 58        | 0         | 137         |
| Christmas Island                         | 0         | 0         | 0           |
| Cocos Islands                            | 0         | 0         | 0           |
| Cook Islands                             | 0         | 0         | 0           |
| Fiji                                     | 0         | 0         | 18          |
| French Polynesia                         | 0         | 0         | 0           |
| Guam                                     | 0         | 0         | 0           |
| Kiribati                                 | 0         | 0         | 0           |
| Marshall Islands                         | 0         | 0         | 0           |
| Micronesia                               | 0         | 0         | 5           |
| Nauru                                    | 0         | 0         | 0           |
| New Caledonia                            | 0         | 16        | 16          |
| New Zealand                              | 0         | 0         | 0           |
| Niue                                     | 0         | 0         | 1           |
| Northern Mariana Islands                 | 0         | 0         | 0           |
| Palau                                    | 0         | 0         | 0           |
| Papua New Guinea                         | 0         | 0         | 1194        |
| Samoa                                    | 0         | 0         | 0           |
| Solomon Islands                          | 0         | 0         | 0           |
| Tokelau                                  | 0         | 0         | 0           |
| Tonga                                    | 0         | 0         | 2           |
| Tuvalu                                   | 0         | 0         | 0           |
| Vanuatu                                  | 0         | 58        | 58          |
| <b>other</b>                             | <b>0</b>  | <b>0</b>  | <b>1</b>    |
| French Southern Territories              | 0         | 0         | 0           |
| Glorioso Islands                         | 0         | 0         | 0           |
| Heard Island and McDonald Islands        | 0         | 0         | 0           |
| Juan De Nova Island                      | 0         | 0         | 0           |
| Norfolk Island                           | 0         | 0         | 0           |
| Pitcairn                                 | 0         | 0         | 0           |
| Réunion                                  | 0         | 0         | 0           |
| Saint Helena                             | 0         | 0         | 0           |
| South Georgia and South Sandwich Islands | 0         | 0         | 0           |
| United States Minor Outlying Islands     | 0         | 0         | 0           |
| Wallis and Futuna                        | 0         | 0         | 1           |
| <b>South Africa</b>                      | <b>0</b>  | <b>0</b>  | <b>336</b>  |
| Botswana                                 | 0         | 0         | 0           |
| Eswatini                                 | 0         | 0         | 48          |
| Lesotho                                  | 0         | 0         | 0           |
| Namibia                                  | 0         | 0         | 4           |

|                                |             |             |              |
|--------------------------------|-------------|-------------|--------------|
| South Africa                   | 0           | 0           | 284          |
| <b>South America</b>           | <b>29</b>   | <b>0</b>    | <b>11147</b> |
| Argentina                      | 0           | 0           | 126          |
| Bolivia                        | 0           | 0           | 753          |
| Brazil                         | 0           | 0           | 7674         |
| Chile                          | 0           | 0           | 0            |
| Colombia                       | 0           | 0           | 522          |
| Ecuador                        | 0           | 0           | 644          |
| Falkland Islands               | 0           | 0           | 0            |
| French Guiana                  | 0           | 0           | 11           |
| Guyana                         | 0           | 0           | 57           |
| Paraguay                       | 0           | 0           | 518          |
| Peru                           | 0           | 0           | 386          |
| Uruguay                        | 0           | 0           | 0            |
| Venezuela                      | 29          | 0           | 456          |
| <b>South Asia</b>              | <b>541</b>  | <b>0</b>    | <b>7193</b>  |
| Afghanistan                    | 0           | 0           | 0            |
| Bangladesh                     | 0           | 0           | 376          |
| Bhutan                         | 0           | 0           | 3            |
| British Indian Ocean Territory | 0           | 0           | 0            |
| India                          | 541         | 0           | 5734         |
| Maldives                       | 0           | 0           | 0            |
| Nepal                          | 0           | 0           | 210          |
| Pakistan                       | 0           | 0           | 868          |
| Seychelles                     | 0           | 0           | 2            |
| Sri Lanka                      | 0           | 0           | 0            |
| <b>Southeast Asia</b>          | <b>1848</b> | <b>1480</b> | <b>11526</b> |
| Brunei Darussalam              | 0           | 0           | 8            |
| Cambodia                       | 103         | 0           | 651          |
| Indonesia                      | 0           | 0           | 2881         |
| Laos                           | 109         | 0           | 513          |
| Malaysia                       | 0           | 0           | 1175         |
| Myanmar                        | 0           | 0           | 18           |
| Philippines                    | 377         | 1310        | 2131         |
| Singapore                      | 0           | 0           | 0            |
| Thailand                       | 0           | 0           | 2193         |
| Timor-Leste                    | 0           | 0           | 5            |
| Vietnam                        | 1259        | 170         | 1951         |
| <b>West Africa</b>             | <b>0</b>    | <b>0</b>    | <b>4670</b>  |
| Benin                          | 0           | 0           | 58           |
| Burkina Faso                   | 0           | 0           | 0            |
| Cabo Verde                     | 0           | 0           | 14           |
| Cameroon                       | 0           | 0           | 1584         |
| Chad                           | 0           | 0           | 3            |
| Côte d'Ivoire                  | 0           | 0           | 265          |
| Gambia                         | 0           | 0           | 0            |
| Ghana                          | 0           | 0           | 253          |
| Guinea                         | 0           | 0           | 1730         |
| Guinea-Bissau                  | 0           | 0           | 10           |
| Liberia                        | 0           | 0           | 463          |

|                       |             |             |              |
|-----------------------|-------------|-------------|--------------|
| Mali                  | 0           | 0           | 8            |
| Mauritania            | 0           | 0           | 0            |
| Niger                 | 0           | 0           | 0            |
| Nigeria               | 0           | 0           | 7            |
| Sao Tome and Principe | 0           | 0           | 11           |
| Senegal               | 0           | 0           | 102          |
| Sierra Leone          | 0           | 0           | 4            |
| Togo                  | 0           | 0           | 158          |
| <b>West Asia</b>      | <b>0</b>    | <b>0</b>    | <b>7</b>     |
| Armenia               | 0           | 0           | 0            |
| Azerbaijan            | 0           | 0           | 0            |
| Georgia               | 0           | 0           | 0            |
| Kazakhstan            | 0           | 0           | 0            |
| Kyrgyzstan            | 0           | 0           | 0            |
| Tajikistan            | 0           | 0           | 0            |
| Turkiye               | 0           | 0           | 7            |
| Turkmenistan          | 0           | 0           | 0            |
| Uzbekistan            | 0           | 0           | 0            |
| <b>Grand Total</b>    | <b>5890</b> | <b>3645</b> | <b>57924</b> |

Table S2.7 Pivot 10\_F

| Row Labels                       | Severe     | Major      | Sum of Banana |
|----------------------------------|------------|------------|---------------|
| <b>Caribbean</b>                 | <b>670</b> | <b>650</b> | <b>1354</b>   |
| Anguilla                         | 0          | 0          | 0             |
| Antigua and Barbuda              | 0          | 2          | 2             |
| Aruba                            | 0          | 0          | 0             |
| Bahamas                          | 4          | 1          | 5             |
| Barbados                         | 0          | 4          | 4             |
| Bermuda                          | 0          | 1          | 1             |
| Bonaire                          | 0          | 0          | 0             |
| British Virgin Islands           | 0          | 1          | 1             |
| Cayman Islands                   | 2          | 0          | 2             |
| Cuba                             | 628        | 19         | 647           |
| Curacao                          | 0          | 0          | 0             |
| Dominica                         | 0          | 6          | 6             |
| Dominican Republic               | 0          | 238        | 238           |
| Grenada                          | 0          | 3          | 3             |
| Guadeloupe                       | 0          | 6          | 6             |
| Haiti                            | 18         | 211        | 229           |
| Jamaica                          | 0          | 94         | 94            |
| Martinique                       | 0          | 8          | 8             |
| Montserrat                       | 0          | 2          | 2             |
| Puerto Rico                      | 0          | 45         | 45            |
| Saba                             | 0          | 0          | 0             |
| Saint Barthelemy                 | 0          | 0          | 0             |
| Saint Eustatius                  | 0          | 0          | 0             |
| Saint Kitts and Nevis            | 0          | 0          | 0             |
| Saint Lucia                      | 0          | 5          | 5             |
| Saint Martin                     | 0          | 0          | 0             |
| Saint Vincent and the Grenadines | 0          | 4          | 4             |
| Sint Maarten                     | 0          | 0          | 0             |
| Suriname                         | 0          | 0          | 34            |
| Trinidad and Tobago              | 18         | 0          | 18            |
| Turks and Caicos Islands         | 0          | 0          | 0             |
| US Virgin Islands                | 0          | 0          | 0             |
| <b>Central Africa</b>            | <b>0</b>   | <b>0</b>   | <b>5457</b>   |
| Angola                           | 0          | 0          | 1728          |
| Central African Republic         | 0          | 0          | 1415          |
| Congo                            | 0          | 0          | 492           |
| Congo DRC                        | 0          | 0          | 1563          |
| Equatorial Guinea                | 0          | 0          | 199           |
| Gabon                            | 0          | 0          | 60            |
| <b>Central America</b>           | <b>130</b> | <b>50</b>  | <b>1622</b>   |
| Belize                           | 27         | 0          | 27            |
| Costa Rica                       | 0          | 0          | 67            |
| El Salvador                      | 0          | 0          | 1             |
| Guatemala                        | 0          | 0          | 264           |
| Honduras                         | 69         | 0          | 448           |
| Mexico                           | 34         | 50         | 606           |
| Nicaragua                        | 0          | 0          | 36            |

|                        |             |             |             |
|------------------------|-------------|-------------|-------------|
| Panama                 | 0           | 0           | 173         |
| <b>East Africa</b>     | <b>1751</b> | <b>620</b>  | <b>9375</b> |
| Burundi                | 0           | 0           | 206         |
| Comoros                | 0           | 0           | 0           |
| Djibouti               | 0           | 0           | 0           |
| Eritrea                | 0           | 0           | 0           |
| Ethiopia               | 0           | 0           | 831         |
| Kenya                  | 0           | 0           | 583         |
| Madagascar             | 1511        | 609         | 2153        |
| Malawi                 | 0           | 0           | 104         |
| Mauritius              | 0           | 11          | 11          |
| Mayotte                | 0           | 0           | 0           |
| Mozambique             | 240         | 0           | 1997        |
| Rwanda                 | 0           | 0           | 92          |
| Somalia                | 0           | 0           | 100         |
| South Sudan            | 0           | 0           | 553         |
| Tanzania               | 0           | 0           | 1598        |
| Uganda                 | 0           | 0           | 1062        |
| Zambia                 | 0           | 0           | 6           |
| Zimbabwe               | 0           | 0           | 79          |
| <b>East Asia</b>       | <b>441</b>  | <b>1747</b> | <b>2982</b> |
| China                  | 441         | 1747        | 2982        |
| Japan                  | 0           | 0           | 0           |
| Mongolia               | 0           | 0           | 0           |
| North Korea            | 0           | 0           | 0           |
| South Korea            | 0           | 0           | 0           |
| <b>Europe</b>          | <b>4</b>    | <b>0</b>    | <b>80</b>   |
| Albania                | 0           | 0           | 0           |
| Andorra                | 0           | 0           | 0           |
| Austria                | 0           | 0           | 0           |
| Azores                 | 0           | 0           | 0           |
| Belarus                | 0           | 0           | 0           |
| Belgium                | 0           | 0           | 0           |
| Bosnia and Herzegovina | 0           | 0           | 0           |
| Bouvet Island          | 0           | 0           | 0           |
| Bulgaria               | 0           | 0           | 0           |
| Canarias               | 0           | 0           | 2           |
| Croatia                | 0           | 0           | 0           |
| Cyprus                 | 0           | 0           | 9           |
| Czech Republic         | 0           | 0           | 0           |
| Denmark                | 0           | 0           | 0           |
| Estonia                | 0           | 0           | 0           |
| Faroe Islands          | 0           | 0           | 0           |
| Finland                | 0           | 0           | 0           |
| France                 | 0           | 0           | 0           |
| Germany                | 0           | 0           | 0           |
| Gibraltar              | 0           | 0           | 0           |
| Greece                 | 0           | 0           | 0           |
| Greenland              | 0           | 0           | 0           |
| Guernsey               | 0           | 0           | 0           |

|                                     |          |          |            |
|-------------------------------------|----------|----------|------------|
| Hungary                             | 0        | 0        | 0          |
| Iceland                             | 0        | 0        | 0          |
| Ireland                             | 0        | 0        | 0          |
| Isle of Man                         | 0        | 0        | 0          |
| Italy                               | 0        | 0        | 0          |
| Jersey                              | 0        | 0        | 0          |
| Latvia                              | 0        | 0        | 0          |
| Liechtenstein                       | 0        | 0        | 0          |
| Lithuania                           | 0        | 0        | 0          |
| Luxembourg                          | 0        | 0        | 0          |
| Madeira                             | 0        | 0        | 0          |
| Malta                               | 0        | 0        | 0          |
| Moldova                             | 0        | 0        | 0          |
| Monaco                              | 0        | 0        | 0          |
| Montenegro                          | 0        | 0        | 0          |
| Netherlands                         | 0        | 0        | 0          |
| North Macedonia                     | 0        | 0        | 0          |
| Norway                              | 0        | 0        | 0          |
| Poland                              | 0        | 0        | 0          |
| Portugal                            | 4        | 0        | 9          |
| Romania                             | 0        | 0        | 0          |
| Russian Federation                  | 0        | 0        | 0          |
| San Marino                          | 0        | 0        | 0          |
| Serbia                              | 0        | 0        | 0          |
| Slovakia                            | 0        | 0        | 0          |
| Slovenia                            | 0        | 0        | 0          |
| Spain                               | 0        | 0        | 60         |
| Svalbard                            | 0        | 0        | 0          |
| Sweden                              | 0        | 0        | 0          |
| Switzerland                         | 0        | 0        | 0          |
| Ukraine                             | 0        | 0        | 0          |
| United Kingdom                      | 0        | 0        | 0          |
| Vatican City                        | 0        | 0        | 0          |
| <b>Middle East and North Africa</b> | <b>0</b> | <b>0</b> | <b>725</b> |
| Algeria                             | 0        | 0        | 0          |
| Bahrain                             | 0        | 0        | 0          |
| Egypt                               | 0        | 0        | 258        |
| Iran                                | 0        | 0        | 32         |
| Iraq                                | 0        | 0        | 1          |
| Israel                              | 0        | 0        | 104        |
| Jordan                              | 0        | 0        | 8          |
| Kuwait                              | 0        | 0        | 0          |
| Lebanon                             | 0        | 0        | 14         |
| Libya                               | 0        | 0        | 0          |
| Morocco                             | 0        | 0        | 53         |
| Oman                                | 0        | 0        | 83         |
| Palestinian Territory               | 0        | 0        | 3          |
| Qatar                               | 0        | 0        | 0          |
| Saudi Arabia                        | 0        | 0        | 0          |
| Sudan                               | 0        | 0        | 1          |

|                                          |            |           |             |
|------------------------------------------|------------|-----------|-------------|
| Syria                                    | 0          | 0         | 0           |
| Tunisia                                  | 0          | 0         | 0           |
| United Arab Emirates                     | 0          | 0         | 0           |
| Yemen                                    | 0          | 0         | 168         |
| <b>north america</b>                     | <b>0</b>   | <b>18</b> | <b>18</b>   |
| Canada                                   | 0          | 0         | 0           |
| Saint Pierre and Miquelon                | 0          | 0         | 0           |
| United States                            | 0          | 18        | 18          |
| <b>Oceania</b>                           | <b>112</b> | <b>78</b> | <b>1431</b> |
| American Samoa                           | 0          | 0         | 0           |
| Australia                                | 107        | 4         | 137         |
| Christmas Island                         | 0          | 0         | 0           |
| Cocos Islands                            | 0          | 0         | 0           |
| Cook Islands                             | 0          | 0         | 0           |
| Fiji                                     | 0          | 0         | 18          |
| French Polynesia                         | 0          | 0         | 0           |
| Guam                                     | 0          | 0         | 0           |
| Kiribati                                 | 0          | 0         | 0           |
| Marshall Islands                         | 0          | 0         | 0           |
| Micronesia                               | 3          | 0         | 5           |
| Nauru                                    | 0          | 0         | 0           |
| New Caledonia                            | 0          | 16        | 16          |
| New Zealand                              | 0          | 0         | 0           |
| Niue                                     | 0          | 0         | 1           |
| Northern Mariana Islands                 | 0          | 0         | 0           |
| Palau                                    | 0          | 0         | 0           |
| Papua New Guinea                         | 2          | 0         | 1194        |
| Samoa                                    | 0          | 0         | 0           |
| Solomon Islands                          | 0          | 0         | 0           |
| Tokelau                                  | 0          | 0         | 0           |
| Tonga                                    | 0          | 0         | 2           |
| Tuvalu                                   | 0          | 0         | 0           |
| Vanuatu                                  | 0          | 58        | 58          |
| <b>other</b>                             | <b>0</b>   | <b>0</b>  | <b>1</b>    |
| French Southern Territories              | 0          | 0         | 0           |
| Glorioso Islands                         | 0          | 0         | 0           |
| Heard Island and McDonald Islands        | 0          | 0         | 0           |
| Juan De Nova Island                      | 0          | 0         | 0           |
| Norfolk Island                           | 0          | 0         | 0           |
| Pitcairn                                 | 0          | 0         | 0           |
| Réunion                                  | 0          | 0         | 0           |
| Saint Helena                             | 0          | 0         | 0           |
| South Georgia and South Sandwich Islands | 0          | 0         | 0           |
| United States Minor Outlying Islands     | 0          | 0         | 0           |
| Wallis and Futuna                        | 0          | 0         | 1           |
| <b>South Africa</b>                      | <b>0</b>   | <b>0</b>  | <b>336</b>  |
| Botswana                                 | 0          | 0         | 0           |
| Eswatini                                 | 0          | 0         | 48          |
| Lesotho                                  | 0          | 0         | 0           |
| Namibia                                  | 0          | 0         | 4           |

|                                |             |             |              |
|--------------------------------|-------------|-------------|--------------|
| South Africa                   | 0           | 0           | 284          |
| <b>South America</b>           | <b>66</b>   | <b>0</b>    | <b>11147</b> |
| Argentina                      | 0           | 0           | 126          |
| Bolivia                        | 0           | 0           | 753          |
| Brazil                         | 0           | 0           | 7674         |
| Chile                          | 0           | 0           | 0            |
| Colombia                       | 0           | 0           | 522          |
| Ecuador                        | 0           | 0           | 644          |
| Falkland Islands               | 0           | 0           | 0            |
| French Guiana                  | 0           | 0           | 11           |
| Guyana                         | 0           | 0           | 57           |
| Paraguay                       | 0           | 0           | 518          |
| Peru                           | 0           | 0           | 386          |
| Uruguay                        | 0           | 0           | 0            |
| Venezuela                      | 66          | 0           | 456          |
| <b>South Asia</b>              | <b>1127</b> | <b>0</b>    | <b>7193</b>  |
| Afghanistan                    | 0           | 0           | 0            |
| Bangladesh                     | 10          | 0           | 376          |
| Bhutan                         | 0           | 0           | 3            |
| British Indian Ocean Territory | 0           | 0           | 0            |
| India                          | 1117        | 0           | 5734         |
| Maldives                       | 0           | 0           | 0            |
| Nepal                          | 0           | 0           | 210          |
| Pakistan                       | 0           | 0           | 868          |
| Seychelles                     | 0           | 0           | 2            |
| Sri Lanka                      | 0           | 0           | 0            |
| <b>Southeast Asia</b>          | <b>2044</b> | <b>2325</b> | <b>11526</b> |
| Brunei Darussalam              | 0           | 0           | 8            |
| Cambodia                       | 391         | 0           | 651          |
| Indonesia                      | 0           | 0           | 2881         |
| Laos                           | 288         | 1           | 513          |
| Malaysia                       | 0           | 0           | 1175         |
| Myanmar                        | 0           | 0           | 18           |
| Philippines                    | 467         | 1360        | 2131         |
| Singapore                      | 0           | 0           | 0            |
| Thailand                       | 66          | 0           | 2193         |
| Timor-Leste                    | 0           | 0           | 5            |
| Vietnam                        | 832         | 964         | 1951         |
| <b>West Africa</b>             | <b>0</b>    | <b>0</b>    | <b>4670</b>  |
| Benin                          | 0           | 0           | 58           |
| Burkina Faso                   | 0           | 0           | 0            |
| Cabo Verde                     | 0           | 0           | 14           |
| Cameroon                       | 0           | 0           | 1584         |
| Chad                           | 0           | 0           | 3            |
| Côte d'Ivoire                  | 0           | 0           | 265          |
| Gambia                         | 0           | 0           | 0            |
| Ghana                          | 0           | 0           | 253          |
| Guinea                         | 0           | 0           | 1730         |
| Guinea-Bissau                  | 0           | 0           | 10           |
| Liberia                        | 0           | 0           | 463          |

|                       |             |             |              |
|-----------------------|-------------|-------------|--------------|
| Mali                  | 0           | 0           | 8            |
| Mauritania            | 0           | 0           | 0            |
| Niger                 | 0           | 0           | 0            |
| Nigeria               | 0           | 0           | 7            |
| Sao Tome and Principe | 0           | 0           | 11           |
| Senegal               | 0           | 0           | 102          |
| Sierra Leone          | 0           | 0           | 4            |
| Togo                  | 0           | 0           | 158          |
| <b>West Asia</b>      | <b>0</b>    | <b>0</b>    | <b>7</b>     |
| Armenia               | 0           | 0           | 0            |
| Azerbaijan            | 0           | 0           | 0            |
| Georgia               | 0           | 0           | 0            |
| Kazakhstan            | 0           | 0           | 0            |
| Kyrgyzstan            | 0           | 0           | 0            |
| Tajikistan            | 0           | 0           | 0            |
| Turkiye               | 0           | 0           | 7            |
| Turkmenistan          | 0           | 0           | 0            |
| Uzbekistan            | 0           | 0           | 0            |
| <b>Grand Total</b>    | <b>6345</b> | <b>5488</b> | <b>57924</b> |

Table S2.8 Pivot 100\_P

| Row Labels                          | Severe     | Major       | Complete   | Sum of Banana |
|-------------------------------------|------------|-------------|------------|---------------|
| <b>Caribbean</b>                    | <b>0</b>   | <b>549</b>  | <b>771</b> | <b>1354</b>   |
| <b>Central Africa</b>               | <b>0</b>   | <b>0</b>    | <b>0</b>   | <b>5457</b>   |
| <b>Central America</b>              | <b>312</b> | <b>617</b>  | <b>0</b>   | <b>1622</b>   |
| <b>East Africa</b>                  | <b>985</b> | <b>2764</b> | <b>0</b>   | <b>9375</b>   |
| <b>East Asia</b>                    | <b>251</b> | <b>1993</b> | <b>82</b>  | <b>2982</b>   |
| <b>Europe</b>                       | <b>17</b>  | <b>42</b>   | <b>0</b>   | <b>80</b>     |
| <b>Middle East and North Africa</b> | <b>47</b>  | <b>89</b>   | <b>0</b>   | <b>725</b>    |
| Algeria                             | 0          | 0           | 0          | 0             |
| Bahrain                             | 0          | 0           | 0          | 0             |
| Egypt                               | 0          | 0           | 0          | 258           |
| Iran                                | 0          | 3           | 0          | 32            |
| Iraq                                | 0          | 0           | 0          | 1             |
| Israel                              | 0          | 0           | 0          | 104           |
| Jordan                              | 0          | 0           | 0          | 8             |
| Kuwait                              | 0          | 0           | 0          | 0             |
| Lebanon                             | 0          | 0           | 0          | 14            |
| Libya                               | 0          | 0           | 0          | 0             |
| Morocco                             | 27         | 26          | 0          | 53            |
| Oman                                | 13         | 58          | 0          | 83            |
| Palestinian Territory               | 0          | 0           | 0          | 3             |
| Qatar                               | 0          | 0           | 0          | 0             |
| Saudi Arabia                        | 0          | 0           | 0          | 0             |
| Sudan                               | 0          | 0           | 0          | 1             |
| Syria                               | 0          | 0           | 0          | 0             |
| Tunisia                             | 0          | 0           | 0          | 0             |
| United Arab Emirates                | 0          | 0           | 0          | 0             |
| Yemen                               | 7          | 2           | 0          | 168           |
| <b>north america</b>                | <b>0</b>   | <b>0</b>    | <b>18</b>  | <b>18</b>     |
| Canada                              | 0          | 0           | 0          | 0             |
| Saint Pierre and Miquelon           | 0          | 0           | 0          | 0             |
| United States                       | 0          | 0           | 18         | 18            |
| <b>Oceania</b>                      | <b>150</b> | <b>301</b>  | <b>0</b>   | <b>1431</b>   |
| American Samoa                      | 0          | 0           | 0          | 0             |
| Australia                           | 4          | 131         | 0          | 137           |
| Christmas Island                    | 0          | 0           | 0          | 0             |
| Cocos Islands                       | 0          | 0           | 0          | 0             |
| Cook Islands                        | 0          | 0           | 0          | 0             |
| Fiji                                | 0          | 0           | 0          | 18            |
| French Polynesia                    | 0          | 0           | 0          | 0             |
| Guam                                | 0          | 0           | 0          | 0             |
| Kiribati                            | 0          | 0           | 0          | 0             |
| Marshall Islands                    | 0          | 0           | 0          | 0             |
| Micronesia                          | 5          | 0           | 0          | 5             |
| Nauru                               | 0          | 0           | 0          | 0             |
| New Caledonia                       | 0          | 16          | 0          | 16            |
| New Zealand                         | 0          | 0           | 0          | 0             |
| Niue                                | 0          | 0           | 0          | 1             |
| Northern Mariana Islands            | 0          | 0           | 0          | 0             |

|                                          |             |             |           |              |
|------------------------------------------|-------------|-------------|-----------|--------------|
| Palau                                    | 0           | 0           | 0         | 0            |
| Papua New Guinea                         | 141         | 96          | 0         | 1194         |
| Samoa                                    | 0           | 0           | 0         | 0            |
| Solomon Islands                          | 0           | 0           | 0         | 0            |
| Tokelau                                  | 0           | 0           | 0         | 0            |
| Tonga                                    | 0           | 0           | 0         | 2            |
| Tuvalu                                   | 0           | 0           | 0         | 0            |
| Vanuatu                                  | 0           | 58          | 0         | 58           |
| <b>other</b>                             | <b>0</b>    | <b>0</b>    | <b>0</b>  | <b>1</b>     |
| French Southern Territories              | 0           | 0           | 0         | 0            |
| Glorioso Islands                         | 0           | 0           | 0         | 0            |
| Heard Island and McDonald Islands        | 0           | 0           | 0         | 0            |
| Juan De Nova Island                      | 0           | 0           | 0         | 0            |
| Norfolk Island                           | 0           | 0           | 0         | 0            |
| Pitcairn                                 | 0           | 0           | 0         | 0            |
| Réunion                                  | 0           | 0           | 0         | 0            |
| Saint Helena                             | 0           | 0           | 0         | 0            |
| South Georgia and South Sandwich Islands | 0           | 0           | 0         | 0            |
| United States Minor Outlying Islands     | 0           | 0           | 0         | 0            |
| Wallis and Futuna                        | 0           | 0           | 0         | 1            |
| <b>South Africa</b>                      | <b>42</b>   | <b>0</b>    | <b>0</b>  | <b>336</b>   |
| Botswana                                 | 0           | 0           | 0         | 0            |
| Eswatini                                 | 4           | 0           | 0         | 48           |
| Lesotho                                  | 0           | 0           | 0         | 0            |
| Namibia                                  | 0           | 0           | 0         | 4            |
| South Africa                             | 38          | 0           | 0         | 284          |
| <b>South America</b>                     | <b>100</b>  | <b>200</b>  | <b>0</b>  | <b>11147</b> |
| Argentina                                | 0           | 0           | 0         | 126          |
| Bolivia                                  | 0           | 0           | 0         | 753          |
| Brazil                                   | 0           | 0           | 0         | 7674         |
| Chile                                    | 0           | 0           | 0         | 0            |
| Colombia                                 | 26          | 14          | 0         | 522          |
| Ecuador                                  | 0           | 0           | 0         | 644          |
| Falkland Islands                         | 0           | 0           | 0         | 0            |
| French Guiana                            | 0           | 0           | 0         | 11           |
| Guyana                                   | 5           | 0           | 0         | 57           |
| Paraguay                                 | 0           | 0           | 0         | 518          |
| Peru                                     | 0           | 0           | 0         | 386          |
| Uruguay                                  | 0           | 0           | 0         | 0            |
| Venezuela                                | 69          | 186         | 0         | 456          |
| <b>South Asia</b>                        | <b>1995</b> | <b>2850</b> | <b>37</b> | <b>7193</b>  |
| Afghanistan                              | 0           | 0           | 0         | 0            |
| Bangladesh                               | 58          | 263         | 21        | 376          |
| Bhutan                                   | 0           | 0           | 0         | 3            |
| British Indian Ocean Territory           | 0           | 0           | 0         | 0            |
| India                                    | 1761        | 2096        | 16        | 5734         |
| Maldives                                 | 0           | 0           | 0         | 0            |
| Nepal                                    | 0           | 0           | 0         | 210          |
| Pakistan                                 | 176         | 491         | 0         | 868          |
| Seychelles                               | 0           | 0           | 0         | 2            |

|                       |             |              |             |              |
|-----------------------|-------------|--------------|-------------|--------------|
| Sri Lanka             | 0           | 0            | 0           | 0            |
| <b>Southeast Asia</b> | <b>2018</b> | <b>2826</b>  | <b>927</b>  | <b>11526</b> |
| Brunei Darussalam     | 0           | 0            | 0           | 8            |
| Cambodia              | 478         | 167          | 0           | 651          |
| Indonesia             | 117         | 3            | 0           | 2881         |
| Laos                  | 212         | 102          | 0           | 513          |
| Malaysia              | 2           | 0            | 0           | 1175         |
| Myanmar               | 2           | 0            | 0           | 18           |
| Philippines           | 236         | 967          | 927         | 2131         |
| Singapore             | 0           | 0            | 0           | 0            |
| Thailand              | 609         | 0            | 0           | 2193         |
| Timor-Leste           | 5           | 0            | 0           | 5            |
| Vietnam               | 357         | 1587         | 0           | 1951         |
| <b>West Africa</b>    | <b>0</b>    | <b>14</b>    | <b>0</b>    | <b>4670</b>  |
| Benin                 | 0           | 0            | 0           | 58           |
| Burkina Faso          | 0           | 0            | 0           | 0            |
| Cabo Verde            | 0           | 14           | 0           | 14           |
| Cameroon              | 0           | 0            | 0           | 1584         |
| Chad                  | 0           | 0            | 0           | 3            |
| Côte d'Ivoire         | 0           | 0            | 0           | 265          |
| Gambia                | 0           | 0            | 0           | 0            |
| Ghana                 | 0           | 0            | 0           | 253          |
| Guinea                | 0           | 0            | 0           | 1730         |
| Guinea-Bissau         | 0           | 0            | 0           | 10           |
| Liberia               | 0           | 0            | 0           | 463          |
| Mali                  | 0           | 0            | 0           | 8            |
| Mauritania            | 0           | 0            | 0           | 0            |
| Niger                 | 0           | 0            | 0           | 0            |
| Nigeria               | 0           | 0            | 0           | 7            |
| Sao Tome and Principe | 0           | 0            | 0           | 11           |
| Senegal               | 0           | 0            | 0           | 102          |
| Sierra Leone          | 0           | 0            | 0           | 4            |
| Togo                  | 0           | 0            | 0           | 158          |
| <b>West Asia</b>      | <b>0</b>    | <b>0</b>     | <b>0</b>    | <b>7</b>     |
| Armenia               | 0           | 0            | 0           | 0            |
| Azerbaijan            | 0           | 0            | 0           | 0            |
| Georgia               | 0           | 0            | 0           | 0            |
| Kazakhstan            | 0           | 0            | 0           | 0            |
| Kyrgyzstan            | 0           | 0            | 0           | 0            |
| Tajikistan            | 0           | 0            | 0           | 0            |
| Turkiye               | 0           | 0            | 0           | 7            |
| Turkmenistan          | 0           | 0            | 0           | 0            |
| Uzbekistan            | 0           | 0            | 0           | 0            |
| <b>Grand Total</b>    | <b>5917</b> | <b>12245</b> | <b>1835</b> | <b>57924</b> |

Table S2.9 Pivot 100\_F

| Row Labels                       | Severe     | Major      | Complete   | Sum of Banana |
|----------------------------------|------------|------------|------------|---------------|
| <b>Caribbean</b>                 | <b>0</b>   | <b>600</b> | <b>720</b> | <b>1354</b>   |
| Anguilla                         | 0          | 0          | 0          | 0             |
| Antigua and Barbuda              | 0          | 0          | 2          | 2             |
| Aruba                            | 0          | 0          | 0          | 0             |
| Bahamas                          | 0          | 0          | 5          | 5             |
| Barbados                         | 0          | 0          | 4          | 4             |
| Bermuda                          | 0          | 0          | 1          | 1             |
| Bonaire                          | 0          | 0          | 0          | 0             |
| British Virgin Islands           | 0          | 0          | 1          | 1             |
| Cayman Islands                   | 0          | 0          | 2          | 2             |
| Cuba                             | 0          | 488        | 159        | 647           |
| Curacao                          | 0          | 0          | 0          | 0             |
| Dominica                         | 0          | 0          | 6          | 6             |
| Dominican Republic               | 0          | 28         | 210        | 238           |
| Grenada                          | 0          | 0          | 3          | 3             |
| Guadeloupe                       | 0          | 0          | 6          | 6             |
| Haiti                            | 0          | 66         | 163        | 229           |
| Jamaica                          | 0          | 0          | 94         | 94            |
| Martinique                       | 0          | 0          | 8          | 8             |
| Montserrat                       | 0          | 0          | 2          | 2             |
| Puerto Rico                      | 0          | 0          | 45         | 45            |
| Saba                             | 0          | 0          | 0          | 0             |
| Saint Barthelemy                 | 0          | 0          | 0          | 0             |
| Saint Eustatius                  | 0          | 0          | 0          | 0             |
| Saint Kitts and Nevis            | 0          | 0          | 0          | 0             |
| Saint Lucia                      | 0          | 0          | 5          | 5             |
| Saint Martin                     | 0          | 0          | 0          | 0             |
| Saint Vincent and the Grenadines | 0          | 0          | 4          | 4             |
| Sint Maarten                     | 0          | 0          | 0          | 0             |
| Suriname                         | 0          | 0          | 0          | 34            |
| Trinidad and Tobago              | 0          | 18         | 0          | 18            |
| Turks and Caicos Islands         | 0          | 0          | 0          | 0             |
| US Virgin Islands                | 0          | 0          | 0          | 0             |
| <b>Central Africa</b>            | <b>0</b>   | <b>0</b>   | <b>0</b>   | <b>5457</b>   |
| Angola                           | 0          | 0          | 0          | 1728          |
| Central African Republic         | 0          | 0          | 0          | 1415          |
| Congo                            | 0          | 0          | 0          | 492           |
| Congo DRC                        | 0          | 0          | 0          | 1563          |
| Equatorial Guinea                | 0          | 0          | 0          | 199           |
| Gabon                            | 0          | 0          | 0          | 60            |
| <b>Central America</b>           | <b>269</b> | <b>396</b> | <b>47</b>  | <b>1622</b>   |
| Belize                           | 0          | 26         | 1          | 27            |
| Costa Rica                       | 51         | 0          | 0          | 67            |
| El Salvador                      | 0          | 0          | 0          | 1             |
| Guatemala                        | 14         | 74         | 0          | 264           |
| Honduras                         | 45         | 176        | 0          | 448           |
| Mexico                           | 145        | 120        | 46         | 606           |
| Nicaragua                        | 0          | 0          | 0          | 36            |

|                        |            |             |            |             |
|------------------------|------------|-------------|------------|-------------|
| Panama                 | 14         | 0           | 0          | 173         |
| <b>East Africa</b>     | <b>922</b> | <b>2852</b> | <b>315</b> | <b>9375</b> |
| Burundi                | 0          | 0           | 0          | 206         |
| Comoros                | 0          | 0           | 0          | 0           |
| Djibouti               | 0          | 0           | 0          | 0           |
| Eritrea                | 0          | 0           | 0          | 0           |
| Ethiopia               | 0          | 0           | 0          | 831         |
| Kenya                  | 0          | 0           | 0          | 583         |
| Madagascar             | 0          | 1849        | 304        | 2153        |
| Malawi                 | 3          | 0           | 0          | 104         |
| Mauritius              | 0          | 0           | 11         | 11          |
| Mayotte                | 0          | 0           | 0          | 0           |
| Mozambique             | 865        | 1003        | 0          | 1997        |
| Rwanda                 | 0          | 0           | 0          | 92          |
| Somalia                | 0          | 0           | 0          | 100         |
| South Sudan            | 0          | 0           | 0          | 553         |
| Tanzania               | 11         | 0           | 0          | 1598        |
| Uganda                 | 0          | 0           | 0          | 1062        |
| Zambia                 | 0          | 0           | 0          | 6           |
| Zimbabwe               | 43         | 0           | 0          | 79          |
| <b>East Asia</b>       | <b>331</b> | <b>1841</b> | <b>319</b> | <b>2982</b> |
| China                  | 331        | 1841        | 319        | 2982        |
| Japan                  | 0          | 0           | 0          | 0           |
| Mongolia               | 0          | 0           | 0          | 0           |
| North Korea            | 0          | 0           | 0          | 0           |
| South Korea            | 0          | 0           | 0          | 0           |
| <b>Europe</b>          | <b>2</b>   | <b>57</b>   | <b>0</b>   | <b>80</b>   |
| Albania                | 0          | 0           | 0          | 0           |
| Andorra                | 0          | 0           | 0          | 0           |
| Austria                | 0          | 0           | 0          | 0           |
| Azores                 | 0          | 0           | 0          | 0           |
| Belarus                | 0          | 0           | 0          | 0           |
| Belgium                | 0          | 0           | 0          | 0           |
| Bosnia and Herzegovina | 0          | 0           | 0          | 0           |
| Bouvet Island          | 0          | 0           | 0          | 0           |
| Bulgaria               | 0          | 0           | 0          | 0           |
| Canarias               | 0          | 2           | 0          | 2           |
| Croatia                | 0          | 0           | 0          | 0           |
| Cyprus                 | 0          | 0           | 0          | 9           |
| Czech Republic         | 0          | 0           | 0          | 0           |
| Denmark                | 0          | 0           | 0          | 0           |
| Estonia                | 0          | 0           | 0          | 0           |
| Faroe Islands          | 0          | 0           | 0          | 0           |
| Finland                | 0          | 0           | 0          | 0           |
| France                 | 0          | 0           | 0          | 0           |
| Germany                | 0          | 0           | 0          | 0           |
| Gibraltar              | 0          | 0           | 0          | 0           |
| Greece                 | 0          | 0           | 0          | 0           |
| Greenland              | 0          | 0           | 0          | 0           |
| Guernsey               | 0          | 0           | 0          | 0           |

|                                     |           |            |          |            |
|-------------------------------------|-----------|------------|----------|------------|
| Hungary                             | 0         | 0          | 0        | 0          |
| Iceland                             | 0         | 0          | 0        | 0          |
| Ireland                             | 0         | 0          | 0        | 0          |
| Isle of Man                         | 0         | 0          | 0        | 0          |
| Italy                               | 0         | 0          | 0        | 0          |
| Jersey                              | 0         | 0          | 0        | 0          |
| Latvia                              | 0         | 0          | 0        | 0          |
| Liechtenstein                       | 0         | 0          | 0        | 0          |
| Lithuania                           | 0         | 0          | 0        | 0          |
| Luxembourg                          | 0         | 0          | 0        | 0          |
| Madeira                             | 0         | 0          | 0        | 0          |
| Malta                               | 0         | 0          | 0        | 0          |
| Moldova                             | 0         | 0          | 0        | 0          |
| Monaco                              | 0         | 0          | 0        | 0          |
| Montenegro                          | 0         | 0          | 0        | 0          |
| Netherlands                         | 0         | 0          | 0        | 0          |
| North Macedonia                     | 0         | 0          | 0        | 0          |
| Norway                              | 0         | 0          | 0        | 0          |
| Poland                              | 0         | 0          | 0        | 0          |
| Portugal                            | 0         | 9          | 0        | 9          |
| Romania                             | 0         | 0          | 0        | 0          |
| Russian Federation                  | 0         | 0          | 0        | 0          |
| San Marino                          | 0         | 0          | 0        | 0          |
| Serbia                              | 0         | 0          | 0        | 0          |
| Slovakia                            | 0         | 0          | 0        | 0          |
| Slovenia                            | 0         | 0          | 0        | 0          |
| Spain                               | 2         | 46         | 0        | 60         |
| Svalbard                            | 0         | 0          | 0        | 0          |
| Sweden                              | 0         | 0          | 0        | 0          |
| Switzerland                         | 0         | 0          | 0        | 0          |
| Ukraine                             | 0         | 0          | 0        | 0          |
| United Kingdom                      | 0         | 0          | 0        | 0          |
| Vatican City                        | 0         | 0          | 0        | 0          |
| <b>Middle East and North Africa</b> | <b>35</b> | <b>121</b> | <b>0</b> | <b>725</b> |
| Algeria                             | 0         | 0          | 0        | 0          |
| Bahrain                             | 0         | 0          | 0        | 0          |
| Egypt                               | 0         | 0          | 0        | 258        |
| Iran                                | 3         | 3          | 0        | 32         |
| Iraq                                | 0         | 0          | 0        | 1          |
| Israel                              | 0         | 0          | 0        | 104        |
| Jordan                              | 0         | 0          | 0        | 8          |
| Kuwait                              | 0         | 0          | 0        | 0          |
| Lebanon                             | 0         | 0          | 0        | 14         |
| Libya                               | 0         | 0          | 0        | 0          |
| Morocco                             | 0         | 53         | 0        | 53         |
| Oman                                | 21        | 58         | 0        | 83         |
| Palestinian Territory               | 0         | 0          | 0        | 3          |
| Qatar                               | 0         | 0          | 0        | 0          |
| Saudi Arabia                        | 0         | 0          | 0        | 0          |
| Sudan                               | 0         | 0          | 0        | 1          |

|                                          |            |            |           |             |
|------------------------------------------|------------|------------|-----------|-------------|
| Syria                                    | 0          | 0          | 0         | 0           |
| Tunisia                                  | 0          | 0          | 0         | 0           |
| United Arab Emirates                     | 0          | 0          | 0         | 0           |
| Yemen                                    | 11         | 7          | 0         | 168         |
| <b>north america</b>                     | <b>0</b>   | <b>0</b>   | <b>18</b> | <b>18</b>   |
| Canada                                   | 0          | 0          | 0         | 0           |
| Saint Pierre and Miquelon                | 0          | 0          | 0         | 0           |
| United States                            | 0          | 0          | 18        | 18          |
| <b>Oceania</b>                           | <b>221</b> | <b>304</b> | <b>74</b> | <b>1431</b> |
| American Samoa                           | 0          | 0          | 0         | 0           |
| Australia                                | 3          | 134        | 0         | 137         |
| Christmas Island                         | 0          | 0          | 0         | 0           |
| Cocos Islands                            | 0          | 0          | 0         | 0           |
| Cook Islands                             | 0          | 0          | 0         | 0           |
| Fiji                                     | 0          | 0          | 0         | 18          |
| French Polynesia                         | 0          | 0          | 0         | 0           |
| Guam                                     | 0          | 0          | 0         | 0           |
| Kiribati                                 | 0          | 0          | 0         | 0           |
| Marshall Islands                         | 0          | 0          | 0         | 0           |
| Micronesia                               | 2          | 3          | 0         | 5           |
| Nauru                                    | 0          | 0          | 0         | 0           |
| New Caledonia                            | 0          | 0          | 16        | 16          |
| New Zealand                              | 0          | 0          | 0         | 0           |
| Niue                                     | 0          | 0          | 0         | 1           |
| Northern Mariana Islands                 | 0          | 0          | 0         | 0           |
| Palau                                    | 0          | 0          | 0         | 0           |
| Papua New Guinea                         | 216        | 167        | 0         | 1194        |
| Samoa                                    | 0          | 0          | 0         | 0           |
| Solomon Islands                          | 0          | 0          | 0         | 0           |
| Tokelau                                  | 0          | 0          | 0         | 0           |
| Tonga                                    | 0          | 0          | 0         | 2           |
| Tuvalu                                   | 0          | 0          | 0         | 0           |
| Vanuatu                                  | 0          | 0          | 58        | 58          |
| <b>other</b>                             | <b>0</b>   | <b>0</b>   | <b>0</b>  | <b>1</b>    |
| French Southern Territories              | 0          | 0          | 0         | 0           |
| Glorioso Islands                         | 0          | 0          | 0         | 0           |
| Heard Island and McDonald Islands        | 0          | 0          | 0         | 0           |
| Juan De Nova Island                      | 0          | 0          | 0         | 0           |
| Norfolk Island                           | 0          | 0          | 0         | 0           |
| Pitcairn                                 | 0          | 0          | 0         | 0           |
| Réunion                                  | 0          | 0          | 0         | 0           |
| Saint Helena                             | 0          | 0          | 0         | 0           |
| South Georgia and South Sandwich Islands | 0          | 0          | 0         | 0           |
| United States Minor Outlying Islands     | 0          | 0          | 0         | 0           |
| Wallis and Futuna                        | 0          | 0          | 0         | 1           |
| <b>South Africa</b>                      | <b>100</b> | <b>3</b>   | <b>0</b>  | <b>336</b>  |
| Botswana                                 | 0          | 0          | 0         | 0           |
| Eswatini                                 | 48         | 0          | 0         | 48          |
| Lesotho                                  | 0          | 0          | 0         | 0           |
| Namibia                                  | 0          | 0          | 0         | 4           |

|                                |             |             |             |              |
|--------------------------------|-------------|-------------|-------------|--------------|
| South Africa                   | 52          | 3           | 0           | 284          |
| <b>South America</b>           | <b>133</b>  | <b>209</b>  | <b>0</b>    | <b>11147</b> |
| Argentina                      | 0           | 0           | 0           | 126          |
| Bolivia                        | 0           | 0           | 0           | 753          |
| Brazil                         | 0           | 0           | 0           | 7674         |
| Chile                          | 0           | 0           | 0           | 0            |
| Colombia                       | 25          | 15          | 0           | 522          |
| Ecuador                        | 0           | 0           | 0           | 644          |
| Falkland Islands               | 0           | 0           | 0           | 0            |
| French Guiana                  | 0           | 0           | 0           | 11           |
| Guyana                         | 29          | 0           | 0           | 57           |
| Paraguay                       | 0           | 0           | 0           | 518          |
| Peru                           | 0           | 0           | 0           | 386          |
| Uruguay                        | 0           | 0           | 0           | 0            |
| Venezuela                      | 79          | 194         | 0           | 456          |
| <b>South Asia</b>              | <b>2827</b> | <b>2744</b> | <b>0</b>    | <b>7193</b>  |
| Afghanistan                    | 0           | 0           | 0           | 0            |
| Bangladesh                     | 104         | 238         | 0           | 376          |
| Bhutan                         | 0           | 0           | 0           | 3            |
| British Indian Ocean Territory | 0           | 0           | 0           | 0            |
| India                          | 2512        | 1973        | 0           | 5734         |
| Maldives                       | 0           | 0           | 0           | 0            |
| Nepal                          | 0           | 0           | 0           | 210          |
| Pakistan                       | 211         | 533         | 0           | 868          |
| Seychelles                     | 0           | 0           | 0           | 2            |
| Sri Lanka                      | 0           | 0           | 0           | 0            |
| <b>Southeast Asia</b>          | <b>2238</b> | <b>3446</b> | <b>1262</b> | <b>11526</b> |
| Brunei Darussalam              | 0           | 0           | 0           | 8            |
| Cambodia                       | 283         | 368         | 0           | 651          |
| Indonesia                      | 497         | 48          | 0           | 2881         |
| Laos                           | 164         | 268         | 0           | 513          |
| Malaysia                       | 43          | 0           | 0           | 1175         |
| Myanmar                        | 9           | 0           | 0           | 18           |
| Philippines                    | 142         | 727         | 1262        | 2131         |
| Singapore                      | 0           | 0           | 0           | 0            |
| Thailand                       | 957         | 222         | 0           | 2193         |
| Timor-Leste                    | 5           | 0           | 0           | 5            |
| Vietnam                        | 138         | 1813        | 0           | 1951         |
| <b>West Africa</b>             | <b>8</b>    | <b>14</b>   | <b>0</b>    | <b>4670</b>  |
| Benin                          | 0           | 0           | 0           | 58           |
| Burkina Faso                   | 0           | 0           | 0           | 0            |
| Cabo Verde                     | 0           | 14          | 0           | 14           |
| Cameroon                       | 0           | 0           | 0           | 1584         |
| Chad                           | 0           | 0           | 0           | 3            |
| Côte d'Ivoire                  | 0           | 0           | 0           | 265          |
| Gambia                         | 0           | 0           | 0           | 0            |
| Ghana                          | 0           | 0           | 0           | 253          |
| Guinea                         | 0           | 0           | 0           | 1730         |
| Guinea-Bissau                  | 8           | 0           | 0           | 10           |
| Liberia                        | 0           | 0           | 0           | 463          |

|                       |             |              |             |              |
|-----------------------|-------------|--------------|-------------|--------------|
| Mali                  | 0           | 0            | 0           | 8            |
| Mauritania            | 0           | 0            | 0           | 0            |
| Niger                 | 0           | 0            | 0           | 0            |
| Nigeria               | 0           | 0            | 0           | 7            |
| Sao Tome and Principe | 0           | 0            | 0           | 11           |
| Senegal               | 0           | 0            | 0           | 102          |
| Sierra Leone          | 0           | 0            | 0           | 4            |
| Togo                  | 0           | 0            | 0           | 158          |
| <b>West Asia</b>      | <b>0</b>    | <b>0</b>     | <b>0</b>    | <b>7</b>     |
| Armenia               | 0           | 0            | 0           | 0            |
| Azerbaijan            | 0           | 0            | 0           | 0            |
| Georgia               | 0           | 0            | 0           | 0            |
| Kazakhstan            | 0           | 0            | 0           | 0            |
| Kyrgyzstan            | 0           | 0            | 0           | 0            |
| Tajikistan            | 0           | 0            | 0           | 0            |
| Turkiye               | 0           | 0            | 0           | 7            |
| Turkmenistan          | 0           | 0            | 0           | 0            |
| Uzbekistan            | 0           | 0            | 0           | 0            |
| <b>Grand Total</b>    | <b>7086</b> | <b>12587</b> | <b>2755</b> | <b>57924</b> |

Table S2.10 Pivot 200\_P

| Row Labels                               | Severe     | Major       | Complete    | Sum of Banana |
|------------------------------------------|------------|-------------|-------------|---------------|
| <b>Caribbean</b>                         | <b>0</b>   | <b>8</b>    | <b>1312</b> | <b>1354</b>   |
| <b>Central Africa</b>                    | <b>0</b>   | <b>0</b>    | <b>0</b>    | <b>5457</b>   |
| <b>Central America</b>                   | <b>392</b> | <b>777</b>  | <b>70</b>   | <b>1622</b>   |
| <b>East Africa</b>                       | <b>841</b> | <b>2984</b> | <b>219</b>  | <b>9375</b>   |
| <b>East Asia</b>                         | <b>290</b> | <b>1979</b> | <b>149</b>  | <b>2982</b>   |
| <b>Europe</b>                            | <b>2</b>   | <b>57</b>   | <b>0</b>    | <b>80</b>     |
| <b>Middle East and North Africa</b>      | <b>32</b>  | <b>130</b>  | <b>0</b>    | <b>725</b>    |
| <b>north america</b>                     | <b>0</b>   | <b>0</b>    | <b>18</b>   | <b>18</b>     |
| Canada                                   | 0          | 0           | 0           | 0             |
| Saint Pierre and Miquelon                | 0          | 0           | 0           | 0             |
| United States                            | 0          | 0           | 18          | 18            |
| <b>Oceania</b>                           | <b>175</b> | <b>348</b>  | <b>52</b>   | <b>1431</b>   |
| American Samoa                           | 0          | 0           | 0           | 0             |
| Australia                                | 3          | 133         | 0           | 137           |
| Christmas Island                         | 0          | 0           | 0           | 0             |
| Cocos Islands                            | 0          | 0           | 0           | 0             |
| Cook Islands                             | 0          | 0           | 0           | 0             |
| Fiji                                     | 0          | 0           | 0           | 18            |
| French Polynesia                         | 0          | 0           | 0           | 0             |
| Guam                                     | 0          | 0           | 0           | 0             |
| Kiribati                                 | 0          | 0           | 0           | 0             |
| Marshall Islands                         | 0          | 0           | 0           | 0             |
| Micronesia                               | 2          | 3           | 0           | 5             |
| Nauru                                    | 0          | 0           | 0           | 0             |
| New Caledonia                            | 0          | 16          | 0           | 16            |
| New Zealand                              | 0          | 0           | 0           | 0             |
| Niue                                     | 0          | 0           | 0           | 1             |
| Northern Mariana Islands                 | 0          | 0           | 0           | 0             |
| Palau                                    | 0          | 0           | 0           | 0             |
| Papua New Guinea                         | 170        | 190         | 0           | 1194          |
| Samoa                                    | 0          | 0           | 0           | 0             |
| Solomon Islands                          | 0          | 0           | 0           | 0             |
| Tokelau                                  | 0          | 0           | 0           | 0             |
| Tonga                                    | 0          | 0           | 0           | 2             |
| Tuvalu                                   | 0          | 0           | 0           | 0             |
| Vanuatu                                  | 0          | 6           | 52          | 58            |
| <b>other</b>                             | <b>0</b>   | <b>0</b>    | <b>0</b>    | <b>1</b>      |
| French Southern Territories              | 0          | 0           | 0           | 0             |
| Glorioso Islands                         | 0          | 0           | 0           | 0             |
| Heard Island and McDonald Islands        | 0          | 0           | 0           | 0             |
| Juan De Nova Island                      | 0          | 0           | 0           | 0             |
| Norfolk Island                           | 0          | 0           | 0           | 0             |
| Pitcairn                                 | 0          | 0           | 0           | 0             |
| Réunion                                  | 0          | 0           | 0           | 0             |
| Saint Helena                             | 0          | 0           | 0           | 0             |
| South Georgia and South Sandwich Islands | 0          | 0           | 0           | 0             |
| United States Minor Outlying Islands     | 0          | 0           | 0           | 0             |
| Wallis and Futuna                        | 0          | 0           | 0           | 1             |

|                                |             |             |             |              |
|--------------------------------|-------------|-------------|-------------|--------------|
| <b>South Africa</b>            | <b>84</b>   | <b>11</b>   | <b>0</b>    | <b>336</b>   |
| Botswana                       | 0           | 0           | 0           | 0            |
| Eswatini                       | 48          | 0           | 0           | 48           |
| Lesotho                        | 0           | 0           | 0           | 0            |
| Namibia                        | 0           | 0           | 0           | 4            |
| South Africa                   | 36          | 11          | 0           | 284          |
| <b>South America</b>           | <b>119</b>  | <b>238</b>  | <b>4</b>    | <b>11147</b> |
| Argentina                      | 0           | 0           | 0           | 126          |
| Bolivia                        | 0           | 0           | 0           | 753          |
| Brazil                         | 0           | 0           | 0           | 7674         |
| Chile                          | 0           | 0           | 0           | 0            |
| Colombia                       | 14          | 26          | 0           | 522          |
| Ecuador                        | 0           | 0           | 0           | 644          |
| Falkland Islands               | 0           | 0           | 0           | 0            |
| French Guiana                  | 0           | 0           | 0           | 11           |
| Guyana                         | 17          | 0           | 0           | 57           |
| Paraguay                       | 0           | 0           | 0           | 518          |
| Peru                           | 0           | 0           | 0           | 386          |
| Uruguay                        | 0           | 0           | 0           | 0            |
| Venezuela                      | 88          | 212         | 4           | 456          |
| <b>South Asia</b>              | <b>2010</b> | <b>3337</b> | <b>557</b>  | <b>7193</b>  |
| Afghanistan                    | 0           | 0           | 0           | 0            |
| Bangladesh                     | 37          | 148         | 184         | 376          |
| Bhutan                         | 0           | 0           | 0           | 3            |
| British Indian Ocean Territory | 0           | 0           | 0           | 0            |
| India                          | 1871        | 2582        | 373         | 5734         |
| Maldives                       | 0           | 0           | 0           | 0            |
| Nepal                          | 0           | 0           | 0           | 210          |
| Pakistan                       | 102         | 607         | 0           | 868          |
| Seychelles                     | 0           | 0           | 0           | 2            |
| Sri Lanka                      | 0           | 0           | 0           | 0            |
| <b>Southeast Asia</b>          | <b>2147</b> | <b>3038</b> | <b>1279</b> | <b>11526</b> |
| Brunei Darussalam              | 0           | 0           | 0           | 8            |
| Cambodia                       | 362         | 289         | 0           | 651          |
| Indonesia                      | 311         | 52          | 0           | 2881         |
| Laos                           | 167         | 192         | 0           | 513          |
| Malaysia                       | 26          | 0           | 0           | 1175         |
| Myanmar                        | 3           | 2           | 0           | 18           |
| Philippines                    | 130         | 721         | 1279        | 2131         |
| Singapore                      | 0           | 0           | 0           | 0            |
| Thailand                       | 904         | 70          | 0           | 2193         |
| Timor-Leste                    | 5           | 0           | 0           | 5            |
| Vietnam                        | 239         | 1712        | 0           | 1951         |
| <b>West Africa</b>             | <b>0</b>    | <b>14</b>   | <b>0</b>    | <b>4670</b>  |
| Benin                          | 0           | 0           | 0           | 58           |
| Burkina Faso                   | 0           | 0           | 0           | 0            |
| Cabo Verde                     | 0           | 14          | 0           | 14           |
| Cameroon                       | 0           | 0           | 0           | 1584         |
| Chad                           | 0           | 0           | 0           | 3            |
| Côte d'Ivoire                  | 0           | 0           | 0           | 265          |

|                       |             |              |             |              |
|-----------------------|-------------|--------------|-------------|--------------|
| Gambia                | 0           | 0            | 0           | 0            |
| Ghana                 | 0           | 0            | 0           | 253          |
| Guinea                | 0           | 0            | 0           | 1730         |
| Guinea-Bissau         | 0           | 0            | 0           | 10           |
| Liberia               | 0           | 0            | 0           | 463          |
| Mali                  | 0           | 0            | 0           | 8            |
| Mauritania            | 0           | 0            | 0           | 0            |
| Niger                 | 0           | 0            | 0           | 0            |
| Nigeria               | 0           | 0            | 0           | 7            |
| Sao Tome and Principe | 0           | 0            | 0           | 11           |
| Senegal               | 0           | 0            | 0           | 102          |
| Sierra Leone          | 0           | 0            | 0           | 4            |
| Togo                  | 0           | 0            | 0           | 158          |
| <b>West Asia</b>      | <b>0</b>    | <b>0</b>     | <b>0</b>    | <b>7</b>     |
| Armenia               | 0           | 0            | 0           | 0            |
| Azerbaijan            | 0           | 0            | 0           | 0            |
| Georgia               | 0           | 0            | 0           | 0            |
| Kazakhstan            | 0           | 0            | 0           | 0            |
| Kyrgyzstan            | 0           | 0            | 0           | 0            |
| Tajikistan            | 0           | 0            | 0           | 0            |
| Turkiye               | 0           | 0            | 0           | 7            |
| Turkmenistan          | 0           | 0            | 0           | 0            |
| Uzbekistan            | 0           | 0            | 0           | 0            |
| <b>Grand Total</b>    | <b>6092</b> | <b>12921</b> | <b>3660</b> | <b>57924</b> |

Table S2.11 Pivot 200\_F

| Row Labels                       | Severe     | Major       | Complete    | Sum of Banana |
|----------------------------------|------------|-------------|-------------|---------------|
| <b>Caribbean</b>                 | <b>34</b>  | <b>5</b>    | <b>1315</b> | <b>1354</b>   |
| Anguilla                         | 0          | 0           | 0           | 0             |
| Antigua and Barbuda              | 0          | 0           | 2           | 2             |
| Aruba                            | 0          | 0           | 0           | 0             |
| Bahamas                          | 0          | 0           | 5           | 5             |
| Barbados                         | 0          | 0           | 4           | 4             |
| Bermuda                          | 0          | 0           | 1           | 1             |
| Bonaire                          | 0          | 0           | 0           | 0             |
| British Virgin Islands           | 0          | 0           | 1           | 1             |
| Cayman Islands                   | 0          | 0           | 2           | 2             |
| Cuba                             | 0          | 0           | 647         | 647           |
| Curacao                          | 0          | 0           | 0           | 0             |
| Dominica                         | 0          | 0           | 6           | 6             |
| Dominican Republic               | 0          | 0           | 238         | 238           |
| Grenada                          | 0          | 0           | 3           | 3             |
| Guadeloupe                       | 0          | 0           | 6           | 6             |
| Haiti                            | 0          | 0           | 229         | 229           |
| Jamaica                          | 0          | 0           | 94          | 94            |
| Martinique                       | 0          | 0           | 8           | 8             |
| Montserrat                       | 0          | 0           | 2           | 2             |
| Puerto Rico                      | 0          | 0           | 45          | 45            |
| Saba                             | 0          | 0           | 0           | 0             |
| Saint Barthelemy                 | 0          | 0           | 0           | 0             |
| Saint Eustatius                  | 0          | 0           | 0           | 0             |
| Saint Kitts and Nevis            | 0          | 0           | 0           | 0             |
| Saint Lucia                      | 0          | 0           | 5           | 5             |
| Saint Martin                     | 0          | 0           | 0           | 0             |
| Saint Vincent and the Grenadines | 0          | 0           | 4           | 4             |
| Sint Maarten                     | 0          | 0           | 0           | 0             |
| Suriname                         | 34         | 0           | 0           | 34            |
| Trinidad and Tobago              | 0          | 5           | 13          | 18            |
| Turks and Caicos Islands         | 0          | 0           | 0           | 0             |
| US Virgin Islands                | 0          | 0           | 0           | 0             |
| <b>Central Africa</b>            | <b>209</b> | <b>0</b>    | <b>0</b>    | <b>5457</b>   |
| Angola                           | 209        | 0           | 0           | 1728          |
| Central African Republic         | 0          | 0           | 0           | 1415          |
| Congo                            | 0          | 0           | 0           | 492           |
| Congo DRC                        | 0          | 0           | 0           | 1563          |
| Equatorial Guinea                | 0          | 0           | 0           | 199           |
| Gabon                            | 0          | 0           | 0           | 60            |
| <b>Central America</b>           | <b>224</b> | <b>454</b>  | <b>99</b>   | <b>1622</b>   |
| Belize                           | 0          | 0           | 27          | 27            |
| Costa Rica                       | 24         | 35          | 0           | 67            |
| El Salvador                      | 0          | 0           | 0           | 1             |
| Guatemala                        | 0          | 88          | 0           | 264           |
| Honduras                         | 0          | 219         | 2           | 448           |
| Mexico                           | 157        | 112         | 70          | 606           |
| Nicaragua                        | 0          | 0           | 0           | 36            |
| Panama                           | 43         | 0           | 0           | 173           |
| <b>East Africa</b>               | <b>733</b> | <b>2603</b> | <b>903</b>  | <b>9375</b>   |
| Burundi                          | 0          | 0           | 0           | 206           |
| Comoros                          | 0          | 0           | 0           | 0             |
| Djibouti                         | 0          | 0           | 0           | 0             |
| Eritrea                          | 0          | 0           | 0           | 0             |

|                        |            |             |            |             |
|------------------------|------------|-------------|------------|-------------|
| Ethiopia               | 0          | 0           | 0          | 831         |
| Kenya                  | 0          | 0           | 0          | 583         |
| Madagascar             | 0          | 1261        | 892        | 2153        |
| Malawi                 | 5          | 0           | 0          | 104         |
| Mauritius              | 0          | 0           | 11         | 11          |
| Mayotte                | 0          | 0           | 0          | 0           |
| Mozambique             | 636        | 1330        | 0          | 1997        |
| Rwanda                 | 0          | 0           | 0          | 92          |
| Somalia                | 0          | 0           | 0          | 100         |
| South Sudan            | 0          | 0           | 0          | 553         |
| Tanzania               | 27         | 10          | 0          | 1598        |
| Uganda                 | 0          | 0           | 0          | 1062        |
| Zambia                 | 0          | 0           | 0          | 6           |
| Zimbabwe               | 65         | 2           | 0          | 79          |
| <b>East Asia</b>       | <b>361</b> | <b>1681</b> | <b>557</b> | <b>2982</b> |
| China                  | 361        | 1681        | 557        | 2982        |
| Japan                  | 0          | 0           | 0          | 0           |
| Mongolia               | 0          | 0           | 0          | 0           |
| North Korea            | 0          | 0           | 0          | 0           |
| South Korea            | 0          | 0           | 0          | 0           |
| <b>Europe</b>          | <b>0</b>   | <b>59</b>   | <b>0</b>   | <b>80</b>   |
| Albania                | 0          | 0           | 0          | 0           |
| Andorra                | 0          | 0           | 0          | 0           |
| Austria                | 0          | 0           | 0          | 0           |
| Azores                 | 0          | 0           | 0          | 0           |
| Belarus                | 0          | 0           | 0          | 0           |
| Belgium                | 0          | 0           | 0          | 0           |
| Bosnia and Herzegovina | 0          | 0           | 0          | 0           |
| Bouvet Island          | 0          | 0           | 0          | 0           |
| Bulgaria               | 0          | 0           | 0          | 0           |
| Canarias               | 0          | 2           | 0          | 2           |
| Croatia                | 0          | 0           | 0          | 0           |
| Cyprus                 | 0          | 0           | 0          | 9           |
| Czech Republic         | 0          | 0           | 0          | 0           |
| Denmark                | 0          | 0           | 0          | 0           |
| Estonia                | 0          | 0           | 0          | 0           |
| Faroe Islands          | 0          | 0           | 0          | 0           |
| Finland                | 0          | 0           | 0          | 0           |
| France                 | 0          | 0           | 0          | 0           |
| Germany                | 0          | 0           | 0          | 0           |
| Gibraltar              | 0          | 0           | 0          | 0           |
| Greece                 | 0          | 0           | 0          | 0           |
| Greenland              | 0          | 0           | 0          | 0           |
| Guernsey               | 0          | 0           | 0          | 0           |
| Hungary                | 0          | 0           | 0          | 0           |
| Iceland                | 0          | 0           | 0          | 0           |
| Ireland                | 0          | 0           | 0          | 0           |
| Isle of Man            | 0          | 0           | 0          | 0           |
| Italy                  | 0          | 0           | 0          | 0           |
| Jersey                 | 0          | 0           | 0          | 0           |
| Latvia                 | 0          | 0           | 0          | 0           |
| Liechtenstein          | 0          | 0           | 0          | 0           |
| Lithuania              | 0          | 0           | 0          | 0           |
| Luxembourg             | 0          | 0           | 0          | 0           |
| Madeira                | 0          | 0           | 0          | 0           |
| Malta                  | 0          | 0           | 0          | 0           |

|                                     |            |            |           |             |
|-------------------------------------|------------|------------|-----------|-------------|
| Moldova                             | 0          | 0          | 0         | 0           |
| Monaco                              | 0          | 0          | 0         | 0           |
| Montenegro                          | 0          | 0          | 0         | 0           |
| Netherlands                         | 0          | 0          | 0         | 0           |
| North Macedonia                     | 0          | 0          | 0         | 0           |
| Norway                              | 0          | 0          | 0         | 0           |
| Poland                              | 0          | 0          | 0         | 0           |
| Portugal                            | 0          | 9          | 0         | 9           |
| Romania                             | 0          | 0          | 0         | 0           |
| Russian Federation                  | 0          | 0          | 0         | 0           |
| San Marino                          | 0          | 0          | 0         | 0           |
| Serbia                              | 0          | 0          | 0         | 0           |
| Slovakia                            | 0          | 0          | 0         | 0           |
| Slovenia                            | 0          | 0          | 0         | 0           |
| Spain                               | 0          | 48         | 0         | 60          |
| Svalbard                            | 0          | 0          | 0         | 0           |
| Sweden                              | 0          | 0          | 0         | 0           |
| Switzerland                         | 0          | 0          | 0         | 0           |
| Ukraine                             | 0          | 0          | 0         | 0           |
| United Kingdom                      | 0          | 0          | 0         | 0           |
| Vatican City                        | 0          | 0          | 0         | 0           |
| <b>Middle East and North Africa</b> | <b>51</b>  | <b>130</b> | <b>1</b>  | <b>725</b>  |
| Algeria                             | 0          | 0          | 0         | 0           |
| Bahrain                             | 0          | 0          | 0         | 0           |
| Egypt                               | 0          | 0          | 0         | 258         |
| Iran                                | 3          | 3          | 0         | 32          |
| Iraq                                | 0          | 0          | 0         | 1           |
| Israel                              | 0          | 0          | 0         | 104         |
| Jordan                              | 0          | 0          | 0         | 8           |
| Kuwait                              | 0          | 0          | 0         | 0           |
| Lebanon                             | 0          | 0          | 0         | 14          |
| Libya                               | 0          | 0          | 0         | 0           |
| Morocco                             | 0          | 53         | 0         | 53          |
| Oman                                | 16         | 66         | 1         | 83          |
| Palestinian Territory               | 0          | 0          | 0         | 3           |
| Qatar                               | 0          | 0          | 0         | 0           |
| Saudi Arabia                        | 0          | 0          | 0         | 0           |
| Sudan                               | 0          | 0          | 0         | 1           |
| Syria                               | 0          | 0          | 0         | 0           |
| Tunisia                             | 0          | 0          | 0         | 0           |
| United Arab Emirates                | 0          | 0          | 0         | 0           |
| Yemen                               | 32         | 8          | 0         | 168         |
| <b>north america</b>                | <b>0</b>   | <b>0</b>   | <b>18</b> | <b>18</b>   |
| Canada                              | 0          | 0          | 0         | 0           |
| Saint Pierre and Miquelon           | 0          | 0          | 0         | 0           |
| United States                       | 0          | 0          | 18        | 18          |
| <b>Oceania</b>                      | <b>251</b> | <b>368</b> | <b>84</b> | <b>1431</b> |
| American Samoa                      | 0          | 0          | 0         | 0           |
| Australia                           | 3          | 126        | 8         | 137         |
| Christmas Island                    | 0          | 0          | 0         | 0           |
| Cocos Islands                       | 0          | 0          | 0         | 0           |
| Cook Islands                        | 0          | 0          | 0         | 0           |
| Fiji                                | 0          | 0          | 0         | 18          |
| French Polynesia                    | 0          | 0          | 0         | 0           |
| Guam                                | 0          | 0          | 0         | 0           |
| Kiribati                            | 0          | 0          | 0         | 0           |

|                                          |             |             |           |              |
|------------------------------------------|-------------|-------------|-----------|--------------|
| Marshall Islands                         | 0           | 0           | 0         | 0            |
| Micronesia                               | 2           | 3           | 0         | 5            |
| Nauru                                    | 0           | 0           | 0         | 0            |
| New Caledonia                            | 0           | 0           | 16        | 16           |
| New Zealand                              | 0           | 0           | 0         | 0            |
| Niue                                     | 0           | 0           | 0         | 1            |
| Northern Mariana Islands                 | 0           | 0           | 0         | 0            |
| Palau                                    | 0           | 0           | 0         | 0            |
| Papua New Guinea                         | 246         | 239         | 2         | 1194         |
| Samoa                                    | 0           | 0           | 0         | 0            |
| Solomon Islands                          | 0           | 0           | 0         | 0            |
| Tokelau                                  | 0           | 0           | 0         | 0            |
| Tonga                                    | 0           | 0           | 0         | 2            |
| Tuvalu                                   | 0           | 0           | 0         | 0            |
| Vanuatu                                  | 0           | 0           | 58        | 58           |
| <b>other</b>                             | <b>0</b>    | <b>0</b>    | <b>0</b>  | <b>1</b>     |
| French Southern Territories              | 0           | 0           | 0         | 0            |
| Glorioso Islands                         | 0           | 0           | 0         | 0            |
| Heard Island and McDonald Islands        | 0           | 0           | 0         | 0            |
| Juan De Nova Island                      | 0           | 0           | 0         | 0            |
| Norfolk Island                           | 0           | 0           | 0         | 0            |
| Pitcairn                                 | 0           | 0           | 0         | 0            |
| Réunion                                  | 0           | 0           | 0         | 0            |
| Saint Helena                             | 0           | 0           | 0         | 0            |
| South Georgia and South Sandwich Islands | 0           | 0           | 0         | 0            |
| United States Minor Outlying Islands     | 0           | 0           | 0         | 0            |
| Wallis and Futuna                        | 0           | 0           | 0         | 1            |
| <b>South Africa</b>                      | <b>78</b>   | <b>40</b>   | <b>0</b>  | <b>336</b>   |
| Botswana                                 | 0           | 0           | 0         | 0            |
| Eswatini                                 | 45          | 3           | 0         | 48           |
| Lesotho                                  | 0           | 0           | 0         | 0            |
| Namibia                                  | 0           | 0           | 0         | 4            |
| South Africa                             | 33          | 37          | 0         | 284          |
| <b>South America</b>                     | <b>160</b>  | <b>249</b>  | <b>2</b>  | <b>11147</b> |
| Argentina                                | 0           | 0           | 0         | 126          |
| Bolivia                                  | 0           | 0           | 0         | 753          |
| Brazil                                   | 0           | 0           | 0         | 7674         |
| Chile                                    | 0           | 0           | 0         | 0            |
| Colombia                                 | 10          | 30          | 0         | 522          |
| Ecuador                                  | 0           | 0           | 0         | 644          |
| Falkland Islands                         | 0           | 0           | 0         | 0            |
| French Guiana                            | 7           | 0           | 0         | 11           |
| Guyana                                   | 38          | 5           | 0         | 57           |
| Paraguay                                 | 0           | 0           | 0         | 518          |
| Peru                                     | 0           | 0           | 0         | 386          |
| Uruguay                                  | 0           | 0           | 0         | 0            |
| Venezuela                                | 105         | 214         | 2         | 456          |
| <b>South Asia</b>                        | <b>2300</b> | <b>3790</b> | <b>10</b> | <b>7193</b>  |
| Afghanistan                              | 0           | 0           | 0         | 0            |
| Bangladesh                               | 77          | 291         | 0         | 376          |
| Bhutan                                   | 0           | 0           | 0         | 3            |
| British Indian Ocean Territory           | 0           | 0           | 0         | 0            |
| India                                    | 2065        | 2871        | 8         | 5734         |
| Maldives                                 | 0           | 0           | 0         | 0            |
| Nepal                                    | 0           | 0           | 0         | 210          |
| Pakistan                                 | 158         | 628         | 2         | 868          |

|                       |             |              |             |              |
|-----------------------|-------------|--------------|-------------|--------------|
| Seychelles            | 0           | 0            | 0           | 2            |
| Sri Lanka             | 0           | 0            | 0           | 0            |
| <b>Southeast Asia</b> | <b>2863</b> | <b>3989</b>  | <b>1353</b> | <b>11526</b> |
| Brunei Darussalam     | 1           | 0            | 0           | 8            |
| Cambodia              | 147         | 504          | 0           | 651          |
| Indonesia             | 1050        | 75           | 0           | 2881         |
| Laos                  | 181         | 303          | 0           | 513          |
| Malaysia              | 189         | 0            | 0           | 1175         |
| Myanmar               | 12          | 0            | 0           | 18           |
| Philippines           | 27          | 751          | 1353        | 2131         |
| Singapore             | 0           | 0            | 0           | 0            |
| Thailand              | 1210        | 446          | 0           | 2193         |
| Timor-Leste           | 0           | 5            | 0           | 5            |
| Vietnam               | 46          | 1905         | 0           | 1951         |
| <b>West Africa</b>    | <b>251</b>  | <b>14</b>    | <b>0</b>    | <b>4670</b>  |
| Benin                 | 0           | 0            | 0           | 58           |
| Burkina Faso          | 0           | 0            | 0           | 0            |
| Cabo Verde            | 0           | 14           | 0           | 14           |
| Cameroon              | 0           | 0            | 0           | 1584         |
| Chad                  | 0           | 0            | 0           | 3            |
| Côte d'Ivoire         | 0           | 0            | 0           | 265          |
| Gambia                | 0           | 0            | 0           | 0            |
| Ghana                 | 0           | 0            | 0           | 253          |
| Guinea                | 207         | 0            | 0           | 1730         |
| Guinea-Bissau         | 10          | 0            | 0           | 10           |
| Liberia               | 0           | 0            | 0           | 463          |
| Mali                  | 0           | 0            | 0           | 8            |
| Mauritania            | 0           | 0            | 0           | 0            |
| Niger                 | 0           | 0            | 0           | 0            |
| Nigeria               | 0           | 0            | 0           | 7            |
| Sao Tome and Principe | 0           | 0            | 0           | 11           |
| Senegal               | 34          | 0            | 0           | 102          |
| Sierra Leone          | 0           | 0            | 0           | 4            |
| Togo                  | 0           | 0            | 0           | 158          |
| <b>West Asia</b>      | <b>0</b>    | <b>0</b>     | <b>0</b>    | <b>7</b>     |
| Armenia               | 0           | 0            | 0           | 0            |
| Azerbaijan            | 0           | 0            | 0           | 0            |
| Georgia               | 0           | 0            | 0           | 0            |
| Kazakhstan            | 0           | 0            | 0           | 0            |
| Kyrgyzstan            | 0           | 0            | 0           | 0            |
| Tajikistan            | 0           | 0            | 0           | 0            |
| Turkiye               | 0           | 0            | 0           | 7            |
| Turkmenistan          | 0           | 0            | 0           | 0            |
| Uzbekistan            | 0           | 0            | 0           | 0            |
| <b>Grand Total</b>    | <b>7515</b> | <b>13382</b> | <b>4342</b> | <b>57924</b> |
